# Supplementary material
Source: PubMed Central journal article supplement (PMC10718299)
Supplement: NIHMS1950211-supplement-Supplemental_materials.pdf [file NIHMS1950211-supplement-Supplemental_materials.pdf]

eTable 1. List of codes to define inclusions, exclusions, and vertebral augmentation.

| Code    | Code Type        | Description                                                                                                  | Category                        |
|---------|------------------|--------------------------------------------------------------------------------------------------------------|---------------------------------|
| M4840   | ICD-10 Diagnosis | Fatigue fracture of vertebra                                                                                 | Osteoporotic Vertebral Fracture |
| M4840XA | ICD-10 Diagnosis | Fatigue fracture of vertebra, site unspecified, initial encounter for fracture                               | Osteoporotic Vertebral Fracture |
| M4840XD | ICD-10 Diagnosis | Fatigue fracture of vertebra, site unspecified, subsequent encounter for fracture with routine healing       | Osteoporotic Vertebral Fracture |
| M4840XG | ICD-10 Diagnosis | Fatigue fracture of vertebra, site unspecified, subsequent encounter for fracture with delayed healing       | Osteoporotic Vertebral Fracture |
| M4840XS | ICD-10 Diagnosis | Fatigue fracture of vertebra, site unspecified, sequela of fracture                                          | Osteoporotic Vertebral Fracture |
| M4843   | ICD-10 Diagnosis | Fatigue fracture of vertebra, cervicothoracic region                                                         | Osteoporotic Vertebral Fracture |
| M4843XA | ICD-10 Diagnosis | Fatigue fracture of vertebra, cervicothoracic region, initial encounter for fracture                         | Osteoporotic Vertebral Fracture |
| M4843XD | ICD-10 Diagnosis | Fatigue fracture of vertebra, cervicothoracic region, subsequent encounter for fracture with routine healing | Osteoporotic Vertebral Fracture |
| M4843XG | ICD-10 Diagnosis | Fatigue fracture of vertebra, cervicothoracic region, subsequent encounter for fracture with delayed healing | Osteoporotic Vertebral Fracture |
| M4843XS | ICD-10 Diagnosis | Fatigue fracture of vertebra, cervicothoracic region, sequela of fracture                                    | Osteoporotic Vertebral Fracture |
| M4844   | ICD-10 Diagnosis | Fatigue fracture of vertebra, thoracic region                                                                | Osteoporotic Vertebral Fracture |
| M4844XA | ICD-10 Diagnosis | Fatigue fracture of vertebra, thoracic region, initial encounter for fracture                                | Osteoporotic Vertebral Fracture |
| M4844XD | ICD-10 Diagnosis | Fatigue fracture of vertebra, thoracic region, subsequent encounter for fracture with routine healing        | Osteoporotic Vertebral Fracture |
| M4844XG | ICD-10 Diagnosis | Fatigue fracture of vertebra, thoracic region, subsequent encounter for fracture with delayed healing        | Osteoporotic Vertebral Fracture |
| M4844XS | ICD-10 Diagnosis | Fatigue fracture of vertebra, thoracic region, sequela of fracture                                           | Osteoporotic Vertebral Fracture |

|         |                  |                                                                                                            |                                 |
|---------|------------------|------------------------------------------------------------------------------------------------------------|---------------------------------|
| M4845   | ICD-10 Diagnosis | Fatigue fracture of vertebra, thoracolumbar region                                                         | Osteoporotic Vertebral Fracture |
| M4845XA | ICD-10 Diagnosis | Fatigue fracture of vertebra, thoracolumbar region, initial encounter for fracture with routine healing    | Osteoporotic Vertebral Fracture |
| M4845XD | ICD-10 Diagnosis | Fatigue fracture of vertebra, thoracolumbar region, subsequent encounter for fracture with routine healing | Osteoporotic Vertebral Fracture |
| M4845XG | ICD-10 Diagnosis | Fatigue fracture of vertebra, thoracolumbar region, subsequent encounter for fracture with delayed healing | Osteoporotic Vertebral Fracture |
| M4845XS | ICD-10 Diagnosis | Fatigue fracture of vertebra, thoracolumbar region, sequela                                                | Osteoporotic Vertebral Fracture |
| M4846   | ICD-10 Diagnosis | Fatigue fracture of vertebra, lumbar region                                                                | Osteoporotic Vertebral Fracture |
| M4846XA | ICD-10 Diagnosis | Fatigue fracture of vertebra, lumbar region, initial encounter for fracture                                | Osteoporotic Vertebral Fracture |
| M4846XD | ICD-10 Diagnosis | Fatigue fracture of vertebra, lumbar region, subsequent encounter for fracture with routine healing        | Osteoporotic Vertebral Fracture |
| M4846XG | ICD-10 Diagnosis | Fatigue fracture of vertebra, lumbar region, subsequent encounter for fracture with delayed healing        | Osteoporotic Vertebral Fracture |
| M4846XS | ICD-10 Diagnosis | Fatigue fracture of vertebra, lumbar region, sequela of fracture                                           | Osteoporotic Vertebral Fracture |
| M4847   | ICD-10 Diagnosis | Fatigue fracture of vertebra, lumbosacral region                                                           | Osteoporotic Vertebral Fracture |
| M4847XA | ICD-10 Diagnosis | Fatigue fracture of vertebra, lumbosacral region, initial encounter for fracture                           | Osteoporotic Vertebral Fracture |
| M4847XD | ICD-10 Diagnosis | Fatigue fracture of vertebra, lumbosacral region, subsequent encounter for fracture with routine healing   | Osteoporotic Vertebral Fracture |
| M4847XG | ICD-10 Diagnosis | Fatigue fracture of vertebra, lumbosacral region, subsequent encounter for fracture with delayed healing   | Osteoporotic Vertebral Fracture |
| M4847XS | ICD-10 Diagnosis | Fatigue fracture of vertebra, lumbosacral region, sequela of fracture                                      | Osteoporotic Vertebral Fracture |
| M4850   | ICD-10 Diagnosis | Collapsed vertebra, not elsewhere classified, site unspecified                                             | Osteoporotic Vertebral Fracture |

|         |                  |                                                                                                                              |                                 |
|---------|------------------|------------------------------------------------------------------------------------------------------------------------------|---------------------------------|
| M4850XA | ICD-10 Diagnosis | Collapsed vertebra, not elsewhere classified, site unspecified, initial encounter for fracture                               | Osteoporotic Vertebral Fracture |
| M4850XD | ICD-10 Diagnosis | Collapsed vertebra, not elsewhere classified, site unspecified, subsequent encounter for fracture with routine healing       | Osteoporotic Vertebral Fracture |
| M4850XG | ICD-10 Diagnosis | Collapsed vertebra, not elsewhere classified, site unspecified, subsequent encounter for fracture with delayed healing       | Osteoporotic Vertebral Fracture |
| M4850XS | ICD-10 Diagnosis | Collapsed vertebra, not elsewhere classified, site unspecified, sequela of fracture                                          | Osteoporotic Vertebral Fracture |
| M4853   | ICD-10 Diagnosis | Collapsed vertebra, not elsewhere classified, cervicothoracic region                                                         | Osteoporotic Vertebral Fracture |
| M4853XA | ICD-10 Diagnosis | Collapsed vertebra, not elsewhere classified, cervicothoracic region, initial encounter for fracture                         | Osteoporotic Vertebral Fracture |
| M4853XD | ICD-10 Diagnosis | Collapsed vertebra, not elsewhere classified, cervicothoracic region, subsequent encounter for fracture with routine healing | Osteoporotic Vertebral Fracture |
| M4853XG | ICD-10 Diagnosis | Collapsed vertebra, not elsewhere classified, cervicothoracic region, subsequent encounter for fracture with delayed healing | Osteoporotic Vertebral Fracture |
| M4853XS | ICD-10 Diagnosis | Collapsed vertebra, not elsewhere classified, cervicothoracic region, sequela of fracture                                    | Osteoporotic Vertebral Fracture |
| M4854   | ICD-10 Diagnosis | Collapsed vertebra, not elsewhere classified, thoracic region                                                                | Osteoporotic Vertebral Fracture |
| M4854XA | ICD-10 Diagnosis | Collapsed vertebra, not elsewhere classified, thoracic region, initial encounter for fracture                                | Osteoporotic Vertebral Fracture |
| M4854XD | ICD-10 Diagnosis | Collapsed vertebra, not elsewhere classified, thoracic region, subsequent encounter for fracture with routine healing        | Osteoporotic Vertebral Fracture |
| M4854XG | ICD-10 Diagnosis | Collapsed vertebra, not elsewhere classified, thoracic region, subsequent encounter for fracture with delayed healing        | Osteoporotic Vertebral Fracture |
| M4854XS | ICD-10 Diagnosis | Collapsed vertebra, not elsewhere classified, thoracic region, sequela of fracture                                           | Osteoporotic Vertebral Fracture |

|         |                  |                                                                                                                            |                                 |
|---------|------------------|----------------------------------------------------------------------------------------------------------------------------|---------------------------------|
| M4855   | ICD-10 Diagnosis | Collapsed vertebra, not elsewhere classified, thoracolumbar region                                                         | Osteoporotic Vertebral Fracture |
| M4855XA | ICD-10 Diagnosis | Collapsed vertebra, not elsewhere classified, thoracolumbar region, initial encounter for fracture                         | Osteoporotic Vertebral Fracture |
| M4855XD | ICD-10 Diagnosis | Collapsed vertebra, not elsewhere classified, thoracolumbar region, subsequent encounter for fracture with routine healing | Osteoporotic Vertebral Fracture |
| M4855XG | ICD-10 Diagnosis | Collapsed vertebra, not elsewhere classified, thoracolumbar region, subsequent encounter for fracture with delayed healing | Osteoporotic Vertebral Fracture |
| M4855XS | ICD-10 Diagnosis | Collapsed vertebra, not elsewhere classified, thoracolumbar region, sequela of fracture                                    | Osteoporotic Vertebral Fracture |
| M4856   | ICD-10 Diagnosis | Collapsed vertebra, not elsewhere classified, lumbar region                                                                | Osteoporotic Vertebral Fracture |
| M4856XA | ICD-10 Diagnosis | Collapsed vertebra, not elsewhere classified, lumbar region, initial encounter for fracture                                | Osteoporotic Vertebral Fracture |
| M4856XD | ICD-10 Diagnosis | Collapsed vertebra, not elsewhere classified, lumbar region, subsequent encounter for fracture with routine healing        | Osteoporotic Vertebral Fracture |
| M4856XG | ICD-10 Diagnosis | Collapsed vertebra, not elsewhere classified, lumbar region, subsequent encounter for fracture with delayed healing        | Osteoporotic Vertebral Fracture |
| M4856XS | ICD-10 Diagnosis | Collapsed vertebra, not elsewhere classified, lumbar region, sequela of fracture                                           | Osteoporotic Vertebral Fracture |
| M4857   | ICD-10 Diagnosis | Collapsed vertebra, not elsewhere classified, lumbosacral region                                                           | Osteoporotic Vertebral Fracture |
| M4857XA | ICD-10 Diagnosis | Collapsed vertebra, not elsewhere classified, lumbosacral region, initial encounter for fracture                           | Osteoporotic Vertebral Fracture |
| M4857XD | ICD-10 Diagnosis | Collapsed vertebra, not elsewhere classified, lumbosacral region, subsequent encounter for fracture with routine healing   | Osteoporotic Vertebral Fracture |
| M4857XG | ICD-10 Diagnosis | Collapsed vertebra, not elsewhere classified, lumbosacral region, subsequent encounter for fracture with delayed healing   | Osteoporotic Vertebral Fracture |

|         |                  |                                                                                                                                  |                                 |
|---------|------------------|----------------------------------------------------------------------------------------------------------------------------------|---------------------------------|
| M4857XS | ICD-10 Diagnosis | Collapsed vertebra, not elsewhere classified, lumbosacral region, sequela of fracture                                            | Osteoporotic Vertebral Fracture |
| M8008   | ICD-10 Diagnosis | Age-related osteoporosis with current pathological fracture, vertebra(e)                                                         | Osteoporotic Vertebral Fracture |
| M8008XA | ICD-10 Diagnosis | Age-related osteoporosis with current pathological fracture, vertebra(e), initial encounter for fracture                         | Osteoporotic Vertebral Fracture |
| M8008XD | ICD-10 Diagnosis | Age-related osteoporosis with current pathological fracture, vertebra(e), subsequent encounter for fracture with routine healing | Osteoporotic Vertebral Fracture |
| M8008XG | ICD-10 Diagnosis | Age-related osteoporosis with current pathological fracture, vertebra(e), subsequent encounter for fracture with delayed healing | Osteoporotic Vertebral Fracture |
| M8008XK | ICD-10 Diagnosis | Age-related osteoporosis with current pathological fracture, vertebra(e), subsequent encounter for fracture with nonunion        | Osteoporotic Vertebral Fracture |
| M8008XP | ICD-10 Diagnosis | Age-related osteoporosis with current pathological fracture, vertebra(e), subsequent encounter for fracture with malunion        | Osteoporotic Vertebral Fracture |
| M8008XS | ICD-10 Diagnosis | Age-related osteoporosis with current pathological fracture, vertebra(e), sequela                                                | Osteoporotic Vertebral Fracture |
| M8088   | ICD-10 Diagnosis | Other osteoporosis with current pathological fracture, vertebrae                                                                 | Osteoporotic Vertebral Fracture |
| M8088XA | ICD-10 Diagnosis | Other osteoporosis with current pathological fracture, vertebra(e), initial encounter for fracture                               | Osteoporotic Vertebral Fracture |
| M8088XD | ICD-10 Diagnosis | Other osteoporosis with current pathological fracture, vertebra(e), subsequent encounter for fracture with routine healing       | Osteoporotic Vertebral Fracture |
| M8088XG | ICD-10 Diagnosis | Other osteoporosis with current pathological fracture, vertebra(e), subsequent encounter for fracture with delayed healing       | Osteoporotic Vertebral Fracture |
| M8088XK | ICD-10 Diagnosis | Other osteoporosis with current pathological fracture, vertebra(e), subsequent encounter for fracture with nonunion              | Osteoporotic Vertebral Fracture |

|         |                  |                                                                                                                     |                                 |
|---------|------------------|---------------------------------------------------------------------------------------------------------------------|---------------------------------|
| M8088XP | ICD-10 Diagnosis | Other osteoporosis with current pathological fracture, vertebra(e), subsequent encounter for fracture with malunion | Osteoporotic Vertebral Fracture |
| M8088XS | ICD-10 Diagnosis | Other osteoporosis with current pathological fracture, vertebra(e), sequela                                         | Osteoporotic Vertebral Fracture |
| S22000A | ICD-10 Diagnosis | Wedge compression fracture of unspecified thoracic vertebra, initial encounter for closed fracture                  | Osteoporotic Vertebral Fracture |
| S22001A | ICD-10 Diagnosis | Stable burst fracture of unspecified thoracic vertebra, initial encounter for closed fracture                       | Osteoporotic Vertebral Fracture |
| S22008A | ICD-10 Diagnosis | Other fracture of unspecified thoracic vertebra, initial encounter for closed fracture                              | Osteoporotic Vertebral Fracture |
| S22009A | ICD-10 Diagnosis | Unspecified fracture of unspecified thoracic vertebra, initial encounter for closed fracture                        | Osteoporotic Vertebral Fracture |
| S22010A | ICD-10 Diagnosis | Wedge compression fracture of first thoracic vertebra, initial encounter for closed fracture                        | Osteoporotic Vertebral Fracture |
| S22011A | ICD-10 Diagnosis | Stable burst fracture of first thoracic vertebra, initial encounter for closed fracture                             | Osteoporotic Vertebral Fracture |
| S22018A | ICD-10 Diagnosis | Other fracture of first thoracic vertebra, initial encounter for closed fracture                                    | Osteoporotic Vertebral Fracture |
| S22019A | ICD-10 Diagnosis | Unspecified fracture of first thoracic vertebra, initial encounter for closed fracture                              | Osteoporotic Vertebral Fracture |
| S22020A | ICD-10 Diagnosis | Wedge compression fracture of second thoracic vertebra, initial encounter for closed fracture                       | Osteoporotic Vertebral Fracture |
| S22021A | ICD-10 Diagnosis | Stable burst fracture of second thoracic vertebra, initial encounter for closed fracture                            | Osteoporotic Vertebral Fracture |
| S22028A | ICD-10 Diagnosis | Other fracture of second thoracic vertebra, initial encounter for closed fracture                                   | Osteoporotic Vertebral Fracture |
| S22029A | ICD-10 Diagnosis | Unspecified fracture of second thoracic vertebra, initial encounter for closed fracture                             | Osteoporotic Vertebral Fracture |
| S22030A | ICD-10 Diagnosis | Wedge compression fracture of third thoracic vertebra, initial encounter for closed fracture                        | Osteoporotic Vertebral Fracture |

|         |                  |                                                                                               |                                 |
|---------|------------------|-----------------------------------------------------------------------------------------------|---------------------------------|
| S22031A | ICD-10 Diagnosis | Stable burst fracture of third thoracic vertebra, initial encounter for closed fracture       | Osteoporotic Vertebral Fracture |
| S22038A | ICD-10 Diagnosis | Other fracture of third thoracic vertebra, initial encounter for closed fracture              | Osteoporotic Vertebral Fracture |
| S22039A | ICD-10 Diagnosis | Unspecified fracture of third thoracic vertebra, initial encounter for closed fracture        | Osteoporotic Vertebral Fracture |
| S22040A | ICD-10 Diagnosis | Wedge compression fracture of fourth thoracic vertebra, initial encounter for closed fracture | Osteoporotic Vertebral Fracture |
| S22041A | ICD-10 Diagnosis | Stable burst fracture of fourth thoracic vertebra, initial encounter for closed fracture      | Osteoporotic Vertebral Fracture |
| S22048A | ICD-10 Diagnosis | Other fracture of fourth thoracic vertebra, initial encounter for closed fracture             | Osteoporotic Vertebral Fracture |
| S22049A | ICD-10 Diagnosis | Unspecified fracture of fourth thoracic vertebra, initial encounter for closed fracture       | Osteoporotic Vertebral Fracture |
| S22050A | ICD-10 Diagnosis | Wedge compression fracture of T5-T6 vertebra, initial encounter for closed fracture           | Osteoporotic Vertebral Fracture |
| S22051A | ICD-10 Diagnosis | Stable burst fracture of T5-T6 vertebra, initial encounter for closed fracture                | Osteoporotic Vertebral Fracture |
| S22058A | ICD-10 Diagnosis | Other fracture of T5-T6 vertebra, initial encounter for closed fracture                       | Osteoporotic Vertebral Fracture |
| S22059A | ICD-10 Diagnosis | Unspecified fracture of T5-T6 vertebra, initial encounter for closed fracture                 | Osteoporotic Vertebral Fracture |
| S22060A | ICD-10 Diagnosis | Wedge compression fracture of T7-T8 vertebra, initial encounter for closed fracture           | Osteoporotic Vertebral Fracture |
| S22061A | ICD-10 Diagnosis | Stable burst fracture of T7-T8 vertebra, initial encounter for closed fracture                | Osteoporotic Vertebral Fracture |
| S22068A | ICD-10 Diagnosis | Other fracture of T7-T8 thoracic vertebra, initial encounter for closed fracture              | Osteoporotic Vertebral Fracture |
| S22069A | ICD-10 Diagnosis | Unspecified fracture of T7-T8 vertebra, initial encounter for closed fracture                 | Osteoporotic Vertebral Fracture |
| S22070A | ICD-10 Diagnosis | Wedge compression fracture of T9-T10 vertebra, initial encounter for closed fracture          | Osteoporotic Vertebral Fracture |

|         |                  |                                                                                                  |                                 |
|---------|------------------|--------------------------------------------------------------------------------------------------|---------------------------------|
| S22071A | ICD-10 Diagnosis | Stable burst fracture of T9-T10 vertebra, initial encounter for closed fracture                  | Osteoporotic Vertebral Fracture |
| S22078A | ICD-10 Diagnosis | Other fracture of T9-T10 vertebra, initial encounter for closed fracture                         | Osteoporotic Vertebral Fracture |
| S22079A | ICD-10 Diagnosis | Unspecified fracture of T9-T10 vertebra, initial encounter for closed fracture                   | Osteoporotic Vertebral Fracture |
| S22080A | ICD-10 Diagnosis | Wedge compression fracture of T11-T12 vertebra, initial encounter for closed fracture            | Osteoporotic Vertebral Fracture |
| S22081A | ICD-10 Diagnosis | Stable burst fracture of T11-T12 vertebra, initial encounter for closed fracture                 | Osteoporotic Vertebral Fracture |
| S22088A | ICD-10 Diagnosis | Other fracture of T11-T12 vertebra, initial encounter for closed fracture                        | Osteoporotic Vertebral Fracture |
| S22089A | ICD-10 Diagnosis | Unspecified fracture of T11-T12 vertebra, initial encounter for closed fracture                  | Osteoporotic Vertebral Fracture |
| S32000A | ICD-10 Diagnosis | Wedge compression fracture of unspecified lumbar vertebra, initial encounter for closed fracture | Osteoporotic Vertebral Fracture |
| S32001A | ICD-10 Diagnosis | Stable burst fracture of unspecified lumbar vertebra, initial encounter for closed fracture      | Osteoporotic Vertebral Fracture |
| S32008A | ICD-10 Diagnosis | Other fracture of unspecified lumbar vertebra, initial encounter for closed fracture             | Osteoporotic Vertebral Fracture |
| S32009A | ICD-10 Diagnosis | Unspecified fracture of unspecified lumbar vertebra, initial encounter for closed fracture       | Osteoporotic Vertebral Fracture |
| S32010A | ICD-10 Diagnosis | Wedge compression fracture of first lumbar vertebra, initial encounter for closed fracture       | Osteoporotic Vertebral Fracture |
| S32011A | ICD-10 Diagnosis | Stable burst fracture of first lumbar vertebra, initial encounter for closed fracture            | Osteoporotic Vertebral Fracture |
| S32018A | ICD-10 Diagnosis | Other fracture of first lumbar vertebra, initial encounter for closed fracture                   | Osteoporotic Vertebral Fracture |
| S32019A | ICD-10 Diagnosis | Unspecified fracture of first lumbar vertebra, initial encounter for closed fracture             | Osteoporotic Vertebral Fracture |
| S32020A | ICD-10 Diagnosis | Wedge compression fracture of second lumbar vertebra, initial encounter for closed fracture      | Osteoporotic Vertebral Fracture |



|         |                  |                                                                                             |                                 |
|---------|------------------|---------------------------------------------------------------------------------------------|---------------------------------|
| S32021A | ICD-10 Diagnosis | Stable burst fracture of second lumbar vertebra, initial encounter for closed fracture      | Osteoporotic Vertebral Fracture |
| S32028A | ICD-10 Diagnosis | Other fracture of second lumbar vertebra, initial encounter for closed fracture             | Osteoporotic Vertebral Fracture |
| S32029A | ICD-10 Diagnosis | Unspecified fracture of second lumbar vertebra, initial encounter for closed fracture       | Osteoporotic Vertebral Fracture |
| S32030A | ICD-10 Diagnosis | Wedge compression fracture of third lumbar vertebra, initial encounter for closed fracture  | Osteoporotic Vertebral Fracture |
| S32031A | ICD-10 Diagnosis | Stable burst fracture of third lumbar vertebra, initial encounter for closed fracture       | Osteoporotic Vertebral Fracture |
| S32038A | ICD-10 Diagnosis | Other fracture of third lumbar vertebra, initial encounter for closed fracture              | Osteoporotic Vertebral Fracture |
| S32039A | ICD-10 Diagnosis | Unspecified fracture of third lumbar vertebra, initial encounter for closed fracture        | Osteoporotic Vertebral Fracture |
| S32040A | ICD-10 Diagnosis | Wedge compression fracture of fourth lumbar vertebra, initial encounter for closed fracture | Osteoporotic Vertebral Fracture |
| S32041A | ICD-10 Diagnosis | Stable burst fracture of fourth lumbar vertebra, initial encounter for closed fracture      | Osteoporotic Vertebral Fracture |
| S32048A | ICD-10 Diagnosis | Other fracture of fourth lumbar vertebra, initial encounter for closed fracture             | Osteoporotic Vertebral Fracture |
| S32049A | ICD-10 Diagnosis | Unspecified fracture of fourth lumbar vertebra, initial encounter for closed fracture       | Osteoporotic Vertebral Fracture |
| S32050A | ICD-10 Diagnosis | Wedge compression fracture of fifth lumbar vertebra, initial encounter for closed fracture  | Osteoporotic Vertebral Fracture |
| S32051A | ICD-10 Diagnosis | Stable burst fracture of fifth lumbar vertebra, initial encounter for closed fracture       | Osteoporotic Vertebral Fracture |
| S32058A | ICD-10 Diagnosis | Other fracture of fifth lumbar vertebra, initial encounter for closed fracture              | Osteoporotic Vertebral Fracture |
| S32059A | ICD-10 Diagnosis | Unspecified fracture of fifth lumbar vertebra, initial encounter for closed fracture        | Osteoporotic Vertebral Fracture |

|         |                  |                                                                                                                                       |                        |
|---------|------------------|---------------------------------------------------------------------------------------------------------------------------------------|------------------------|
| M80000  | ICD-10 Diagnosis | Age-related osteoporosis with current pathological fracture, unspecified site                                                         | Osteoporosis Diagnosis |
| M8000XA | ICD-10 Diagnosis | Age-related osteoporosis with current pathological fracture, unspecified site, initial encounter for fracture                         | Osteoporosis Diagnosis |
| M8000XD | ICD-10 Diagnosis | Age-related osteoporosis with current pathological fracture, unspecified site, subsequent encounter for fracture with routine healing | Osteoporosis Diagnosis |
| M8000XG | ICD-10 Diagnosis | Age-related osteoporosis with current pathological fracture, unspecified site, subsequent encounter for fracture with delayed healing | Osteoporosis Diagnosis |
| M8000XK | ICD-10 Diagnosis | Age-related osteoporosis with current pathological fracture, unspecified site, subsequent encounter for fracture with nonunion        | Osteoporosis Diagnosis |
| M8000XP | ICD-10 Diagnosis | Age-related osteoporosis with current pathological fracture, unspecified site, subsequent encounter for fracture with nonunion        | Osteoporosis Diagnosis |
| M8000XS | ICD-10 Diagnosis | Age-related osteoporosis with current pathological fracture, unspecified site, sequela                                                | Osteoporosis Diagnosis |
| M8001   | ICD-10 Diagnosis | Age-related osteoporosis with current pathological fracture, shoulder                                                                 | Osteoporosis Diagnosis |
| M80011  | ICD-10 Diagnosis | Age-related osteoporosis with current pathological fracture, right shoulder                                                           | Osteoporosis Diagnosis |
| M80011A | ICD-10 Diagnosis | Age-related osteoporosis with current pathological fracture, right shoulder, initial encounter for fracture                           | Osteoporosis Diagnosis |
| M80011D | ICD-10 Diagnosis | Age-related osteoporosis with current pathological fracture, right shoulder subsequent encounter for fracture with routine healing    | Osteoporosis Diagnosis |

|         |                  |                                                                                                                                   |                        |
|---------|------------------|-----------------------------------------------------------------------------------------------------------------------------------|------------------------|
| M80011G | ICD-10 Diagnosis | Age-related osteoporosis with current pathological fracture, right shouldersubsequent encounter for fracture with delayed healing | Osteoporosis Diagnosis |
| M80011K | ICD-10 Diagnosis | Age-related osteoporosis with current pathological fracture, right shouldersubsequent encounter for fracture with nonunion        | Osteoporosis Diagnosis |
| M80011P | ICD-10 Diagnosis | Age-related osteoporosis with current pathological fracture, right shoulder subsequent encounter for fracture with malunion       | Osteoporosis Diagnosis |
| M80011S | ICD-10 Diagnosis | Age-related osteoporosis with current pathological fracture, right shouldersequela                                                | Osteoporosis Diagnosis |
| M80012  | ICD-10 Diagnosis | Age-related osteoporosis with current pathological fracture, left shoulder                                                        | Osteoporosis Diagnosis |
| M80012A | ICD-10 Diagnosis | Age-related osteoporosis with current pathological fracture, left shoulderinitial encounter for fracture                          | Osteoporosis Diagnosis |
| M80012D | ICD-10 Diagnosis | Age-related osteoporosis with current pathological fracture, left shouldersubsequent encounter for fracture with routine healing  | Osteoporosis Diagnosis |
| M80012G | ICD-10 Diagnosis | Age-related osteoporosis with current pathological fracture, left shouldersubsequent encounter for fracture with delayed healing  | Osteoporosis Diagnosis |
| M80012K | ICD-10 Diagnosis | Age-related osteoporosis with current pathological fracture, left shouldersubsequent encounter for fracture with nonunion         | Osteoporosis Diagnosis |
| M80012P | ICD-10 Diagnosis | Age-related osteoporosis with current pathological fracture, left shouldersubsequent encounter for fracture with malunion         | Osteoporosis Diagnosis |
| M80012S | ICD-10 Diagnosis | Age-related osteoporosis with current pathological fracture, left shouldersequela                                                 | Osteoporosis Diagnosis |
| M80019  | ICD-10 Diagnosis | Age-related osteoporosis with current pathological fracture, unspecified shoulder                                                 | Osteoporosis Diagnosis |

|         |                  |                                                                                                                                         |                        |
|---------|------------------|-----------------------------------------------------------------------------------------------------------------------------------------|------------------------|
| M80019A | ICD-10 Diagnosis | Age-related osteoporosis with current pathological fracture, unspecified shoulderinitial encounter for fracture                         | Osteoporosis Diagnosis |
| M80019D | ICD-10 Diagnosis | Age-related osteoporosis with current pathological fracture, unspecified shouldersubsequent encounter for fracture with routine healing | Osteoporosis Diagnosis |
| M80019G | ICD-10 Diagnosis | Age-related osteoporosis with current pathological fracture, unspecified shouldersubsequent encounter for fracture with delayed healing | Osteoporosis Diagnosis |
| M80019K | ICD-10 Diagnosis | Age-related osteoporosis with current pathological fracture, unspecified shouldersubsequent encounter for fracture with nonunion        | Osteoporosis Diagnosis |
| M80019P | ICD-10 Diagnosis | Age-related osteoporosis with current pathological fracture, unspecified shouldersubsequent encounter for fracture with malunion        | Osteoporosis Diagnosis |
| M80019S | ICD-10 Diagnosis | Age-related osteoporosis with current pathological fracture, unspecified shouldersequela                                                | Osteoporosis Diagnosis |
| M8002   | ICD-10 Diagnosis | Age-related osteoporosis with current pathological fracture, humerus                                                                    | Osteoporosis Diagnosis |
| M80021  | ICD-10 Diagnosis | Age-related osteoporosis with current pathological fracture, right humerus                                                              | Osteoporosis Diagnosis |
| M80021A | ICD-10 Diagnosis | Age-related osteoporosis with current pathological fracture, right humerusinitial encounter for fracture                                | Osteoporosis Diagnosis |
| M80021D | ICD-10 Diagnosis | Age-related osteoporosis with current pathological fracture, right humerussubsequent encounter for fracture with routine healing        | Osteoporosis Diagnosis |
| M80021G | ICD-10 Diagnosis | Age-related osteoporosis with current pathological fracture, right humerussubsequent encounter for fracture with delayed healing        | Osteoporosis Diagnosis |

|         |                  |                                                                                                                                   |                        |
|---------|------------------|-----------------------------------------------------------------------------------------------------------------------------------|------------------------|
| M80021K | ICD-10 Diagnosis | Age-related osteoporosis with current pathological fracture, right humerus subsequent encounter for fracture with nonunion        | Osteoporosis Diagnosis |
| M80021P | ICD-10 Diagnosis | Age-related osteoporosis with current pathological fracture, right humerus subsequent encounter for fracture with malunion        | Osteoporosis Diagnosis |
| M80021S | ICD-10 Diagnosis | Age-related osteoporosis with current pathological fracture, right humerus sequela                                                | Osteoporosis Diagnosis |
| M80022  | ICD-10 Diagnosis | Age-related osteoporosis with current pathological fracture, left humerus                                                         | Osteoporosis Diagnosis |
| M80022A | ICD-10 Diagnosis | Age-related osteoporosis with current pathological fracture, left humerus, initial encounter for fracture                         | Osteoporosis Diagnosis |
| M80022A | ICD-10 Diagnosis | Age-related osteoporosis with current pathological fracture, left humerus initial encounter for fracture                          | Osteoporosis Diagnosis |
| M80022D | ICD-10 Diagnosis | Age-related osteoporosis with current pathological fracture, left humerus, subsequent encounter for fracture with routine healing | Osteoporosis Diagnosis |
| M80022D | ICD-10 Diagnosis | Age-related osteoporosis with current pathological fracture, left humerus subsequent encounter for fracture with routine healing  | Osteoporosis Diagnosis |
| M80022G | ICD-10 Diagnosis | Age-related osteoporosis with current pathological fracture, left humerus subsequent encounter for fracture with delayed healing  | Osteoporosis Diagnosis |
| M80022K | ICD-10 Diagnosis | Age-related osteoporosis with current pathological fracture, left humerus subsequent encounter for fracture with nonunion         | Osteoporosis Diagnosis |
| M80022P | ICD-10 Diagnosis | Age-related osteoporosis with current pathological fracture, left humerus subsequent encounter for fracture with malunion         | Osteoporosis Diagnosis |
| M80022S | ICD-10 Diagnosis | Age-related osteoporosis with current pathological fracture, left humerus sequela                                                 | Osteoporosis Diagnosis |
| M80029  | ICD-10 Diagnosis | Age-related osteoporosis with current pathological fracture, unspecified humerus                                                  | Osteoporosis Diagnosis |

|         |                  |                                                                                                                                        |                        |
|---------|------------------|----------------------------------------------------------------------------------------------------------------------------------------|------------------------|
| M80029A | ICD-10 Diagnosis | Age-related osteoporosis with current pathological fracture, unspecified humerusinitial encounter for fracture                         | Osteoporosis Diagnosis |
| M80029D | ICD-10 Diagnosis | Age-related osteoporosis with current pathological fracture, unspecified humerussubsequent encounter for fracture with routine healing | Osteoporosis Diagnosis |
| M80029G | ICD-10 Diagnosis | Age-related osteoporosis with current pathological fracture, unspecified humerussubsequent encounter for fracture with delayed healing | Osteoporosis Diagnosis |
| M80029K | ICD-10 Diagnosis | Age-related osteoporosis with current pathological fracture, unspecified humerus subsequent encounter for fracture with nonunion       | Osteoporosis Diagnosis |
| M80029P | ICD-10 Diagnosis | Age-related osteoporosis with current pathological fracture, unspecified humerus subsequent encounter for fracture with malunion       | Osteoporosis Diagnosis |
| M80029S | ICD-10 Diagnosis | Age-related osteoporosis with current pathological fracture, unspecified humerus sequela                                               | Osteoporosis Diagnosis |
| M8003   | ICD-10 Diagnosis | Age-related osteoporosis with current pathological fracture, forearm                                                                   | Osteoporosis Diagnosis |
| M80031  | ICD-10 Diagnosis | Age-related osteoporosis with current pathological fracture, right forearm                                                             | Osteoporosis Diagnosis |
| M80031A | ICD-10 Diagnosis | Age-related osteoporosis with current pathological fracture, right forearm initial encounter for fracture                              | Osteoporosis Diagnosis |
| M80031D | ICD-10 Diagnosis | Age-related osteoporosis with current pathological fracture, right forearm subsequent encounter for fracture with routine healing      | Osteoporosis Diagnosis |
| M80031G | ICD-10 Diagnosis | Age-related osteoporosis with current pathological fracture, right forearm subsequent encounter for fracture with delayed healing      | Osteoporosis Diagnosis |

|         |                  |                                                                                                                                   |                        |
|---------|------------------|-----------------------------------------------------------------------------------------------------------------------------------|------------------------|
| M80031K | ICD-10 Diagnosis | Age-related osteoporosis with current pathological fracture, right forearm subsequent encounter for fracture with nonunion        | Osteoporosis Diagnosis |
| M80031P | ICD-10 Diagnosis | Age-related osteoporosis with current pathological fracture, right forearm subsequent encounter for fracture with malunion        | Osteoporosis Diagnosis |
| M80031S | ICD-10 Diagnosis | Age-related osteoporosis with current pathological fracture, right forearm sequela                                                | Osteoporosis Diagnosis |
| M80032  | ICD-10 Diagnosis | Age-related osteoporosis with current pathological fracture, left forearm                                                         | Osteoporosis Diagnosis |
| M80032A | ICD-10 Diagnosis | Age-related osteoporosis with current pathological fracture, left forearm, initial encounter for fracture                         | Osteoporosis Diagnosis |
| M80032A | ICD-10 Diagnosis | Age-related osteoporosis with current pathological fracture, left forearm initial encounter for fracture                          | Osteoporosis Diagnosis |
| M80032D | ICD-10 Diagnosis | Age-related osteoporosis with current pathological fracture, left forearm, subsequent encounter for fracture with routine healing | Osteoporosis Diagnosis |
| M80032D | ICD-10 Diagnosis | Age-related osteoporosis with current pathological fracture, left forearm subsequent encounter for fracture with routine healing  | Osteoporosis Diagnosis |
| M80032G | ICD-10 Diagnosis | Age-related osteoporosis with current pathological fracture, left forearm subsequent encounter for fracture with delayed healing  | Osteoporosis Diagnosis |
| M80032K | ICD-10 Diagnosis | Age-related osteoporosis with current pathological fracture, left forearm subsequent encounter for fracture with nonunion         | Osteoporosis Diagnosis |
| M80032P | ICD-10 Diagnosis | Age-related osteoporosis with current pathological fracture, left forearm subsequent encounter for fracture with malunion         | Osteoporosis Diagnosis |
| M80032S | ICD-10 Diagnosis | Age-related osteoporosis with current pathological fracture, left forearm sequela                                                 | Osteoporosis Diagnosis |
| M80039  | ICD-10 Diagnosis | Age-related osteoporosis with current pathological fracture, unspecified forearm                                                  | Osteoporosis Diagnosis |

|         |                  |                                                                                                                                         |                        |
|---------|------------------|-----------------------------------------------------------------------------------------------------------------------------------------|------------------------|
| M80039A | ICD-10 Diagnosis | Age-related osteoporosis with current pathological fracture, unspecified forearm initial encounter for fracture                         | Osteoporosis Diagnosis |
| M80039D | ICD-10 Diagnosis | Age-related osteoporosis with current pathological fracture, unspecified forearm subsequent encounter for fracture with routine healing | Osteoporosis Diagnosis |
| M80039G | ICD-10 Diagnosis | Age-related osteoporosis with current pathological fracture, unspecified forearm subsequent encounter for fracture with delayed healing | Osteoporosis Diagnosis |
| M80039K | ICD-10 Diagnosis | Age-related osteoporosis with current pathological fracture, unspecified forearm subsequent encounter for fracture with nonunion        | Osteoporosis Diagnosis |
| M80039P | ICD-10 Diagnosis | Age-related osteoporosis with current pathological fracture, unspecified forearm subsequent encounter for fracture with malunion        | Osteoporosis Diagnosis |
| M80039S | ICD-10 Diagnosis | Age-related osteoporosis with current pathological fracture, unspecified forearm sequela                                                | Osteoporosis Diagnosis |
| M8004   | ICD-10 Diagnosis | Age-related osteoporosis with current pathological fracture, hand                                                                       | Osteoporosis Diagnosis |
| M80041  | ICD-10 Diagnosis | Age-related osteoporosis with current pathological fracture, right hand                                                                 | Osteoporosis Diagnosis |
| M80041A | ICD-10 Diagnosis | Age-related osteoporosis with current pathological fracture, right hand, initial encounter for fracture                                 | Osteoporosis Diagnosis |
| M80041A | ICD-10 Diagnosis | Age-related osteoporosis with current pathological fracture, right hand initial encounter for fracture                                  | Osteoporosis Diagnosis |
| M80041D | ICD-10 Diagnosis | Age-related osteoporosis with current pathological fracture, right hand subsequent encounter for fracture with routine healing          | Osteoporosis Diagnosis |
| M80041G | ICD-10 Diagnosis | Age-related osteoporosis with current pathological fracture, right hand subsequent encounter for fracture with delayed healing          | Osteoporosis Diagnosis |



|         |                  |                                                                                                                               |                        |
|---------|------------------|-------------------------------------------------------------------------------------------------------------------------------|------------------------|
| M80041K | ICD-10 Diagnosis | Age-related osteoporosis with current pathological fracture, right hand subsequent encounter for fracture with nonunion       | Osteoporosis Diagnosis |
| M80041P | ICD-10 Diagnosis | Age-related osteoporosis with current pathological fracture, right hand subsequent encounter for fracture with malunion       | Osteoporosis Diagnosis |
| M80041S | ICD-10 Diagnosis | Age-related osteoporosis with current pathological fracture, right hand sequela                                               | Osteoporosis Diagnosis |
| M80042  | ICD-10 Diagnosis | Age-related osteoporosis with current pathological fracture, left hand                                                        | Osteoporosis Diagnosis |
| M80042A | ICD-10 Diagnosis | Age-related osteoporosis with current pathological fracture, left hand initial encounter for fracture                         | Osteoporosis Diagnosis |
| M80042D | ICD-10 Diagnosis | Age-related osteoporosis with current pathological fracture, left hand subsequent encounter for fracture with routine healing | Osteoporosis Diagnosis |
| M80042G | ICD-10 Diagnosis | Age-related osteoporosis with current pathological fracture, left hand subsequent encounter for fracture with delayed healing | Osteoporosis Diagnosis |
| M80042K | ICD-10 Diagnosis | Age-related osteoporosis with current pathological fracture, left hand subsequent encounter for fracture with nonunion        | Osteoporosis Diagnosis |
| M80042P | ICD-10 Diagnosis | Age-related osteoporosis with current pathological fracture, left hand subsequent encounter for fracture with malunion        | Osteoporosis Diagnosis |
| M80042S | ICD-10 Diagnosis | Age-related osteoporosis with current pathological fracture, left hand sequela                                                | Osteoporosis Diagnosis |
| M80049  | ICD-10 Diagnosis | Age-related osteoporosis with current pathological fracture, unspecified hand                                                 | Osteoporosis Diagnosis |
| M80049A | ICD-10 Diagnosis | Age-related osteoporosis with current pathological fracture, unspecified hand initial encounter for fracture                  | Osteoporosis Diagnosis |

|         |                  |                                                                                                                                      |                        |
|---------|------------------|--------------------------------------------------------------------------------------------------------------------------------------|------------------------|
| M80049D | ICD-10 Diagnosis | Age-related osteoporosis with current pathological fracture, unspecified hand subsequent encounter for fracture with routine healing | Osteoporosis Diagnosis |
| M80049G | ICD-10 Diagnosis | Age-related osteoporosis with current pathological fracture, unspecified hand subsequent encounter for fracture with delayed healing | Osteoporosis Diagnosis |
| M80049K | ICD-10 Diagnosis | Age-related osteoporosis with current pathological fracture, unspecified hand subsequent encounter for fracture with nonunion        | Osteoporosis Diagnosis |
| M80049P | ICD-10 Diagnosis | Age-related osteoporosis with current pathological fracture, unspecified hand subsequent encounter for fracture with malunion        | Osteoporosis Diagnosis |
| M80049S | ICD-10 Diagnosis | Age-related osteoporosis with current pathological fracture, unspecified hand sequela                                                | Osteoporosis Diagnosis |
| M8005   | ICD-10 Diagnosis | Age-related osteoporosis with current pathological fracture, femur                                                                   | Osteoporosis Diagnosis |
| M80051  | ICD-10 Diagnosis | Age-related osteoporosis with current pathological fracture, right femur                                                             | Osteoporosis Diagnosis |
| M80051A | ICD-10 Diagnosis | Age-related osteoporosis with current pathological fracture, right femur, initial encounter for fracture                             | Osteoporosis Diagnosis |
| M80051A | ICD-10 Diagnosis | Age-related osteoporosis with current pathological fracture, right femur initial encounter for fracture                              | Osteoporosis Diagnosis |
| M80051D | ICD-10 Diagnosis | Age-related osteoporosis with current pathological fracture, right femur, subsequent encounter for fracture with routine healing     | Osteoporosis Diagnosis |
| M80051D | ICD-10 Diagnosis | Age-related osteoporosis with current pathological fracture, right femur subsequent encounter for fracture with routine healing      | Osteoporosis Diagnosis |
| M80051G | ICD-10 Diagnosis | Age-related osteoporosis with current pathological fracture, right femur subsequent encounter for fracture with delayed healing      | Osteoporosis Diagnosis |

|         |                  |                                                                                                                                 |                        |
|---------|------------------|---------------------------------------------------------------------------------------------------------------------------------|------------------------|
| M80051K | ICD-10 Diagnosis | Age-related osteoporosis with current pathological fracture, right femur subsequent encounter for fracture with nonunion        | Osteoporosis Diagnosis |
| M80051P | ICD-10 Diagnosis | Age-related osteoporosis with current pathological fracture, right femur subsequent encounter for fracture with malunion        | Osteoporosis Diagnosis |
| M80051S | ICD-10 Diagnosis | Age-related osteoporosis with current pathological fracture, right femur, sequela                                               | Osteoporosis Diagnosis |
| M80051S | ICD-10 Diagnosis | Age-related osteoporosis with current pathological fracture, right femur sequela                                                | Osteoporosis Diagnosis |
| M80052  | ICD-10 Diagnosis | Age-related osteoporosis with current pathological fracture, left femur                                                         | Osteoporosis Diagnosis |
| M80052A | ICD-10 Diagnosis | Age-related osteoporosis with current pathological fracture, left femur, initial encounter for fracture                         | Osteoporosis Diagnosis |
| M80052A | ICD-10 Diagnosis | Age-related osteoporosis with current pathological fracture, left femur initial encounter for fracture                          | Osteoporosis Diagnosis |
| M80052D | ICD-10 Diagnosis | Age-related osteoporosis with current pathological fracture, left femur, subsequent encounter for fracture with routine healing | Osteoporosis Diagnosis |
| M80052D | ICD-10 Diagnosis | Age-related osteoporosis with current pathological fracture, left femur subsequent encounter for fracture with routine healing  | Osteoporosis Diagnosis |
| M80052D | ICD-10 Diagnosis | Age-related osteoporosis with current pathological fracture, left femur subsequent encounter for fracture with delayed healing  | Osteoporosis Diagnosis |
| M80052G | ICD-10 Diagnosis | Age-related osteoporosis with current pathological fracture, left femur subsequent encounter for fracture with nonunion         | Osteoporosis Diagnosis |
| M80052K | ICD-10 Diagnosis | Age-related osteoporosis with current pathological fracture, left femur subsequent encounter for fracture with malunion         | Osteoporosis Diagnosis |
| M80052P | ICD-10 Diagnosis | Age-related osteoporosis with current pathological fracture, left femur sequela                                                 | Osteoporosis Diagnosis |
| M80052S | ICD-10 Diagnosis | Age-related osteoporosis with current pathological fracture, left femur sequela                                                 | Osteoporosis Diagnosis |
| M80059  | ICD-10 Diagnosis | Age-related osteoporosis with current pathological fracture, unspecified femur                                                  | Osteoporosis Diagnosis |

|         |                  |                                                                                                                                       |                        |
|---------|------------------|---------------------------------------------------------------------------------------------------------------------------------------|------------------------|
| M80059A | ICD-10 Diagnosis | Age-related osteoporosis with current pathological fracture, unspecified femur initial encounter for fracture                         | Osteoporosis Diagnosis |
| M80059D | ICD-10 Diagnosis | Age-related osteoporosis with current pathological fracture, unspecified femur subsequent encounter for fracture with routine healing | Osteoporosis Diagnosis |
| M80059G | ICD-10 Diagnosis | Age-related osteoporosis with current pathological fracture, unspecified femur subsequent encounter for fracture with delayed healing | Osteoporosis Diagnosis |
| M80059K | ICD-10 Diagnosis | Age-related osteoporosis with current pathological fracture, unspecified femur subsequent encounter for fracture with nonunion        | Osteoporosis Diagnosis |
| M80059P | ICD-10 Diagnosis | Age-related osteoporosis with current pathological fracture, unspecified femur subsequent encounter for fracture with malunion        | Osteoporosis Diagnosis |
| M80059S | ICD-10 Diagnosis | Age-related osteoporosis with current pathological fracture, unspecified femur sequela                                                | Osteoporosis Diagnosis |
| M8006   | ICD-10 Diagnosis | Age-related osteoporosis with current pathological fracture, lower leg                                                                | Osteoporosis Diagnosis |
| M80061  | ICD-10 Diagnosis | Age-related osteoporosis with current pathological fracture, right lower leg                                                          | Osteoporosis Diagnosis |
| M80061A | ICD-10 Diagnosis | Age-related osteoporosis with current pathological fracture, right lower leg initial encounter for fracture                           | Osteoporosis Diagnosis |
| M80061D | ICD-10 Diagnosis | Age-related osteoporosis with current pathological fracture, right lower leg subsequent encounter for fracture with routine healing   | Osteoporosis Diagnosis |
| M80061G | ICD-10 Diagnosis | Age-related osteoporosis with current pathological fracture, right lower leg subsequent encounter for fracture with delayed healing   | Osteoporosis Diagnosis |

|         |                  |                                                                                                                                    |                        |
|---------|------------------|------------------------------------------------------------------------------------------------------------------------------------|------------------------|
| M80061K | ICD-10 Diagnosis | Age-related osteoporosis with current pathological fracture, right lower leg subsequent encounter for fracture with nonunion       | Osteoporosis Diagnosis |
| M80061P | ICD-10 Diagnosis | Age-related osteoporosis with current pathological fracture, right lower leg subsequent encounter for fracture with malunion       | Osteoporosis Diagnosis |
| M80061S | ICD-10 Diagnosis | Age-related osteoporosis with current pathological fracture, right lower leg sequela                                               | Osteoporosis Diagnosis |
| M80062  | ICD-10 Diagnosis | Age-related osteoporosis with current pathological fracture, left lower leg                                                        | Osteoporosis Diagnosis |
| M80062A | ICD-10 Diagnosis | Age-related osteoporosis with current pathological fracture, left lower leg initial encounter for fracture                         | Osteoporosis Diagnosis |
| M80062D | ICD-10 Diagnosis | Age-related osteoporosis with current pathological fracture, left lower leg subsequent encounter for fracture with routine healing | Osteoporosis Diagnosis |
| M80062G | ICD-10 Diagnosis | Age-related osteoporosis with current pathological fracture, left lower leg subsequent encounter for fracture with delayed healing | Osteoporosis Diagnosis |
| M80062K | ICD-10 Diagnosis | Age-related osteoporosis with current pathological fracture, left lower leg subsequent encounter for fracture with nonunion        | Osteoporosis Diagnosis |
| M80062P | ICD-10 Diagnosis | Age-related osteoporosis with current pathological fracture, left lower leg subsequent encounter for fracture with malunion        | Osteoporosis Diagnosis |
| M80062S | ICD-10 Diagnosis | Age-related osteoporosis with current pathological fracture, left lower leg sequela                                                | Osteoporosis Diagnosis |
| M80069  | ICD-10 Diagnosis | Age-related osteoporosis with current pathological fracture, unspecified lower leg                                                 | Osteoporosis Diagnosis |
| M80069A | ICD-10 Diagnosis | Age-related osteoporosis with current pathological fracture, unspecified lower leg initial encounter for fracture                  | Osteoporosis Diagnosis |

|         |                  |                                                                                                                                           |                        |
|---------|------------------|-------------------------------------------------------------------------------------------------------------------------------------------|------------------------|
| M80069D | ICD-10 Diagnosis | Age-related osteoporosis with current pathological fracture, unspecified lower leg subsequent encounter for fracture with routine healing | Osteoporosis Diagnosis |
| M80069G | ICD-10 Diagnosis | Age-related osteoporosis with current pathological fracture, unspecified lower leg subsequent encounter for fracture with delayed healing | Osteoporosis Diagnosis |
| M80069K | ICD-10 Diagnosis | Age-related osteoporosis with current pathological fracture, unspecified lower leg subsequent encounter for fracture with nonunion        | Osteoporosis Diagnosis |
| M80069P | ICD-10 Diagnosis | Age-related osteoporosis with current pathological fracture, unspecified lower leg subsequent encounter for fracture with malunion        | Osteoporosis Diagnosis |
| M80069S | ICD-10 Diagnosis | Age-related osteoporosis with current pathological fracture, unspecified lower leg sequela                                                | Osteoporosis Diagnosis |
| M8007   | ICD-10 Diagnosis | Age-related osteoporosis with current pathological fracture, ankle and foot                                                               | Osteoporosis Diagnosis |
| M80071  | ICD-10 Diagnosis | Age-related osteoporosis with current pathological fracture, right ankle and foot                                                         | Osteoporosis Diagnosis |
| M80071A | ICD-10 Diagnosis | Age-related osteoporosis with current pathological fracture, right ankle and foot initial encounter for fracture                          | Osteoporosis Diagnosis |
| M80071D | ICD-10 Diagnosis | Age-related osteoporosis with current pathological fracture, right ankle and foot subsequent encounter for fracture with routine healing  | Osteoporosis Diagnosis |
| M80071G | ICD-10 Diagnosis | Age-related osteoporosis with current pathological fracture, right ankle and foot subsequent encounter for fracture with delayed healing  | Osteoporosis Diagnosis |

|         |                  |                                                                                                                                         |                        |
|---------|------------------|-----------------------------------------------------------------------------------------------------------------------------------------|------------------------|
| M80071K | ICD-10 Diagnosis | Age-related osteoporosis with current pathological fracture, right ankle and foot subsequent encounter for fracture with nonunion       | Osteoporosis Diagnosis |
| M80071P | ICD-10 Diagnosis | Age-related osteoporosis with current pathological fracture, right ankle and foot subsequent encounter for fracture with malunion       | Osteoporosis Diagnosis |
| M80071S | ICD-10 Diagnosis | Age-related osteoporosis with current pathological fracture, right ankle and foot sequela                                               | Osteoporosis Diagnosis |
| M80072  | ICD-10 Diagnosis | Age-related osteoporosis with current pathological fracture, left ankle and foot                                                        | Osteoporosis Diagnosis |
| M80072A | ICD-10 Diagnosis | Age-related osteoporosis with current pathological fracture, left ankle and foot initial encounter for fracture                         | Osteoporosis Diagnosis |
| M80072D | ICD-10 Diagnosis | Age-related osteoporosis with current pathological fracture, left ankle and foot                                                        | Osteoporosis Diagnosis |
| M80072D | ICD-10 Diagnosis | Age-related osteoporosis with current pathological fracture, left ankle and foot subsequent encounter for fracture with routine healing | Osteoporosis Diagnosis |
| M80072G | ICD-10 Diagnosis | Age-related osteoporosis with current pathological fracture, left ankle and foot subsequent encounter for fracture with delayed healing | Osteoporosis Diagnosis |
| M80072K | ICD-10 Diagnosis | Age-related osteoporosis with current pathological fracture, left ankle and foot subsequent encounter for fracture with nonunion        | Osteoporosis Diagnosis |
| M80072P | ICD-10 Diagnosis | Age-related osteoporosis with current pathological fracture, left ankle and foot subsequent encounter for fracture with malunion        | Osteoporosis Diagnosis |
| M80072S | ICD-10 Diagnosis | Age-related osteoporosis with current pathological fracture, left ankle and foot sequela                                                | Osteoporosis Diagnosis |

|         |                  |                                                                                                                                                |                        |
|---------|------------------|------------------------------------------------------------------------------------------------------------------------------------------------|------------------------|
| M80079  | ICD-10 Diagnosis | Age-related osteoporosis with current pathological fracture, unspecified ankle and foot                                                        | Osteoporosis Diagnosis |
| M80079A | ICD-10 Diagnosis | Age-related osteoporosis with current pathological fracture, unspecified ankle and foot initial encounter for fracture                         | Osteoporosis Diagnosis |
| M80079D | ICD-10 Diagnosis | Age-related osteoporosis with current pathological fracture, unspecified ankle and foot subsequent encounter for fracture with routine healing | Osteoporosis Diagnosis |
| M80079G | ICD-10 Diagnosis | Age-related osteoporosis with current pathological fracture, unspecified ankle and foot subsequent encounter for fracture with delayed healing | Osteoporosis Diagnosis |
| M80079K | ICD-10 Diagnosis | Age-related osteoporosis with current pathological fracture, unspecified ankle and foot subsequent encounter for fracture with nonunion        | Osteoporosis Diagnosis |
| M80079P | ICD-10 Diagnosis | Age-related osteoporosis with current pathological fracture, unspecified ankle and foot subsequent encounter for fracture with malunion        | Osteoporosis Diagnosis |
| M80079S | ICD-10 Diagnosis | Age-related osteoporosis with current pathological fracture, unspecified ankle and foot sequela                                                | Osteoporosis Diagnosis |
| M8008   | ICD-10 Diagnosis | Age-related osteoporosis with current pathological fracture, vertebra(e)                                                                       | Osteoporosis Diagnosis |
| M8008XA | ICD-10 Diagnosis | Age-related osteoporosis with current pathological fracture, vertebra(e), initial encounter for fracture                                       | Osteoporosis Diagnosis |
| M8008XD | ICD-10 Diagnosis | Age-related osteoporosis with current pathological fracture, vertebra(e), subsequent encounter for fracture with routine healing               | Osteoporosis Diagnosis |
| M8008XG | ICD-10 Diagnosis | Age-related osteoporosis with current pathological fracture, vertebra(e), subsequent encounter for fracture with delayed healing               | Osteoporosis Diagnosis |



|         |                  |                                                                                                                                 |                        |
|---------|------------------|---------------------------------------------------------------------------------------------------------------------------------|------------------------|
| M8008XK | ICD-10 Diagnosis | Age-related osteoporosis with current pathological fracture, vertebra(e), subsequent encounter for fracture with nonunion       | Osteoporosis Diagnosis |
| M8008XP | ICD-10 Diagnosis | Age-related osteoporosis with current pathological fracture, vertebra(e), subsequent encounter for fracture with malunion       | Osteoporosis Diagnosis |
| M8008XS | ICD-10 Diagnosis | Age-related osteoporosis with current pathological fracture, vertebra(e), sequela                                               | Osteoporosis Diagnosis |
| M8080   | ICD-10 Diagnosis | Other osteoporosis with current pathological fracture, unspecified site                                                         | Osteoporosis Diagnosis |
| M8080XA | ICD-10 Diagnosis | Other osteoporosis with current pathological fracture, unspecified site, initial encounter for fracture                         | Osteoporosis Diagnosis |
| M8080XD | ICD-10 Diagnosis | Other osteoporosis with current pathological fracture, unspecified site, subsequent encounter for fracture with routine healing | Osteoporosis Diagnosis |
| M8080XG | ICD-10 Diagnosis | Other osteoporosis with current pathological fracture, unspecified site, subsequent encounter for fracture with routine healing | Osteoporosis Diagnosis |
| M8080XK | ICD-10 Diagnosis | Other osteoporosis with current pathological fracture, unspecified site, subsequent encounter for fracture with delayed healing | Osteoporosis Diagnosis |
| M8080XP | ICD-10 Diagnosis | Other osteoporosis with current pathological fracture, unspecified site, subsequent encounter for fracture with nonunion        | Osteoporosis Diagnosis |
| M8080XS | ICD-10 Diagnosis | Other osteoporosis with current pathological fracture, unspecified site, sequela                                                | Osteoporosis Diagnosis |
| M8081   | ICD-10 Diagnosis | Other osteoporosis with pathological fracture, shoulder                                                                         | Osteoporosis Diagnosis |
| M80811  | ICD-10 Diagnosis | Other osteoporosis with current pathological fracture, right shoulder                                                           | Osteoporosis Diagnosis |
| M80811A | ICD-10 Diagnosis | Other osteoporosis with current pathological fracture, right shoulder, initial encounter for fracture                           | Osteoporosis Diagnosis |
| M80811D | ICD-10 Diagnosis | Other osteoporosis with current pathological fracture, right shoulder, subsequent encounter for fracture with routine healing   | Osteoporosis Diagnosis |

|         |                  |                                                                                                                              |                        |
|---------|------------------|------------------------------------------------------------------------------------------------------------------------------|------------------------|
| M80811G | ICD-10 Diagnosis | Other osteoporosis with current pathological fracture, right shoulder subsequent encounter for fracture with delayed healing | Osteoporosis Diagnosis |
| M80811K | ICD-10 Diagnosis | Other osteoporosis with current pathological fracture, right shoulder subsequent encounter for fracture with nonunion        | Osteoporosis Diagnosis |
| M80811P | ICD-10 Diagnosis | Other osteoporosis with current pathological fracture, right shoulder subsequent encounter for fracture with malunion        | Osteoporosis Diagnosis |
| M80811S | ICD-10 Diagnosis | Other osteoporosis with current pathological fracture, right shoulder sequela                                                | Osteoporosis Diagnosis |
| M80812  | ICD-10 Diagnosis | Other osteoporosis with current pathological fracture, left shoulder                                                         | Osteoporosis Diagnosis |
| M80812A | ICD-10 Diagnosis | Other osteoporosis with current pathological fracture, left shoulder initial encounter for fracture                          | Osteoporosis Diagnosis |
| M80812D | ICD-10 Diagnosis | Other osteoporosis with current pathological fracture, left shoulder subsequent encounter for fracture with routine healing  | Osteoporosis Diagnosis |
| M80812G | ICD-10 Diagnosis | Other osteoporosis with current pathological fracture, left shoulder subsequent encounter for fracture with delayed healing  | Osteoporosis Diagnosis |
| M80812K | ICD-10 Diagnosis | Other osteoporosis with current pathological fracture, left shoulder subsequent encounter for fracture with nonunion         | Osteoporosis Diagnosis |
| M80812P | ICD-10 Diagnosis | Other osteoporosis with current pathological fracture, left shoulder subsequent encounter for fracture with malunion         | Osteoporosis Diagnosis |
| M80812S | ICD-10 Diagnosis | Other osteoporosis with current pathological fracture, left shoulder sequela                                                 | Osteoporosis Diagnosis |
| M80819  | ICD-10 Diagnosis | Other osteoporosis with current pathological fracture, unspecified shoulder                                                  | Osteoporosis Diagnosis |
| M80819A | ICD-10 Diagnosis | Other osteoporosis with current pathological fracture, unspecified shoulder initial encounter for fracture                   | Osteoporosis Diagnosis |

|         |                  |                                                                                                                                    |                        |
|---------|------------------|------------------------------------------------------------------------------------------------------------------------------------|------------------------|
| M80819D | ICD-10 Diagnosis | Other osteoporosis with current pathological fracture, unspecified shoulder subsequent encounter for fracture with routine healing | Osteoporosis Diagnosis |
| M80819G | ICD-10 Diagnosis | Other osteoporosis with current pathological fracture, unspecified shoulder subsequent encounter for fracture with delayed healing | Osteoporosis Diagnosis |
| M80819K | ICD-10 Diagnosis | Other osteoporosis with current pathological fracture, unspecified shoulder subsequent encounter for fracture with nonunion        | Osteoporosis Diagnosis |
| M80819P | ICD-10 Diagnosis | Other osteoporosis with current pathological fracture, unspecified shoulder subsequent encounter for fracture with malunion        | Osteoporosis Diagnosis |
| M80819S | ICD-10 Diagnosis | Other osteoporosis with current pathological fracture, unspecified shoulder sequela                                                | Osteoporosis Diagnosis |
| M8082   | ICD-10 Diagnosis | Other osteoporosis with current pathological fracture, humerus                                                                     | Osteoporosis Diagnosis |
| M80821  | ICD-10 Diagnosis | Other osteoporosis with current pathological fracture, right humerus                                                               | Osteoporosis Diagnosis |
| M80821A | ICD-10 Diagnosis | Other osteoporosis with current pathological fracture, right humerus initial encounter for fracture                                | Osteoporosis Diagnosis |
| M80821D | ICD-10 Diagnosis | Other osteoporosis with current pathological fracture, right humerus subsequent encounter for fracture with routine healing        | Osteoporosis Diagnosis |
| M80821G | ICD-10 Diagnosis | Other osteoporosis with current pathological fracture, right humerus subsequent encounter for fracture with delayed healing        | Osteoporosis Diagnosis |
| M80821K | ICD-10 Diagnosis | Other osteoporosis with current pathological fracture, right humerus subsequent encounter for fracture with nonunion               | Osteoporosis Diagnosis |
| M80821P | ICD-10 Diagnosis | Other osteoporosis with current pathological fracture, right humerus subsequent encounter for fracture with malunion               | Osteoporosis Diagnosis |
| M80821S | ICD-10 Diagnosis | Other osteoporosis with current pathological fracture, right humerus sequela                                                       | Osteoporosis Diagnosis |
| M80822  | ICD-10 Diagnosis | Other osteoporosis with current pathological fracture, left humerus                                                                | Osteoporosis Diagnosis |

|         |                  |                                                                                                                                   |                        |
|---------|------------------|-----------------------------------------------------------------------------------------------------------------------------------|------------------------|
| M80822A | ICD-10 Diagnosis | Other osteoporosis with current pathological fracture, left humerus initial encounter for fracture                                | Osteoporosis Diagnosis |
| M80822D | ICD-10 Diagnosis | Other osteoporosis with current pathological fracture, left humerus subsequent encounter for fracture with routine healing        | Osteoporosis Diagnosis |
| M80822G | ICD-10 Diagnosis | Other osteoporosis with current pathological fracture, left humerus subsequent encounter for fracture with delayed healing        | Osteoporosis Diagnosis |
| M80822K | ICD-10 Diagnosis | Other osteoporosis with current pathological fracture, left humerus subsequent encounter for fracture with nonunion               | Osteoporosis Diagnosis |
| M80822P | ICD-10 Diagnosis | Other osteoporosis with current pathological fracture, left humerus subsequent encounter for fracture with malunion               | Osteoporosis Diagnosis |
| M80822S | ICD-10 Diagnosis | Other osteoporosis with current pathological fracture, left humerus sequela                                                       | Osteoporosis Diagnosis |
| M80829  | ICD-10 Diagnosis | Other osteoporosis with current pathological fracture, unspecified humerus                                                        | Osteoporosis Diagnosis |
| M80829A | ICD-10 Diagnosis | Other osteoporosis with current pathological fracture, unspecified humerus initial encounter for fracture                         | Osteoporosis Diagnosis |
| M80829D | ICD-10 Diagnosis | Other osteoporosis with current pathological fracture, unspecified humerus subsequent encounter for fracture with routine healing | Osteoporosis Diagnosis |
| M80829G | ICD-10 Diagnosis | Other osteoporosis with current pathological fracture, unspecified humerus subsequent encounter for fracture with delayed healing | Osteoporosis Diagnosis |
| M80829K | ICD-10 Diagnosis | Other osteoporosis with current pathological fracture, unspecified humerus subsequent encounter for fracture with nonunion        | Osteoporosis Diagnosis |
| M80829P | ICD-10 Diagnosis | Other osteoporosis with current pathological fracture, unspecified humerus subsequent encounter for fracture with malunion        | Osteoporosis Diagnosis |

|         |                  |                                                                                                                             |                        |
|---------|------------------|-----------------------------------------------------------------------------------------------------------------------------|------------------------|
| M80829S | ICD-10 Diagnosis | Other osteoporosis with current pathological fracture, unspecified humerus sequela                                          | Osteoporosis Diagnosis |
| M8083   | ICD-10 Diagnosis | Other osteoporosis with current pathological fracture, forearm                                                              | Osteoporosis Diagnosis |
| M80831  | ICD-10 Diagnosis | Other osteoporosis with current pathological fracture, right forearm                                                        | Osteoporosis Diagnosis |
| M80831A | ICD-10 Diagnosis | Other osteoporosis with current pathological fracture, right forearm initial encounter for fracture                         | Osteoporosis Diagnosis |
| M80831D | ICD-10 Diagnosis | Other osteoporosis with current pathological fracture, right forearm subsequent encounter for fracture with routine healing | Osteoporosis Diagnosis |
| M80831G | ICD-10 Diagnosis | Other osteoporosis with current pathological fracture, right forearm subsequent encounter for fracture with delayed healing | Osteoporosis Diagnosis |
| M80831K | ICD-10 Diagnosis | Other osteoporosis with current pathological fracture, right forearm subsequent encounter for fracture with nonunion        | Osteoporosis Diagnosis |
| M80831P | ICD-10 Diagnosis | Other osteoporosis with current pathological fracture, right forearm subsequent encounter for fracture with malunion        | Osteoporosis Diagnosis |
| M80831S | ICD-10 Diagnosis | Other osteoporosis with current pathological fracture, right forearm sequela                                                | Osteoporosis Diagnosis |
| M80832  | ICD-10 Diagnosis | Other osteoporosis with current pathological fracture, left forearm                                                         | Osteoporosis Diagnosis |
| M80832A | ICD-10 Diagnosis | Other osteoporosis with current pathological fracture, left forearm initial encounter for fracture                          | Osteoporosis Diagnosis |
| M80832D | ICD-10 Diagnosis | Other osteoporosis with current pathological fracture, left forearm subsequent encounter for fracture with routine healing  | Osteoporosis Diagnosis |
| M80832G | ICD-10 Diagnosis | Other osteoporosis with current pathological fracture, left forearm subsequent encounter for fracture with delayed healing  | Osteoporosis Diagnosis |
| M80832K | ICD-10 Diagnosis | Other osteoporosis with current pathological fracture, left forearm subsequent encounter for fracture with nonunion         | Osteoporosis Diagnosis |

|         |                  |                                                                                                                                   |                        |
|---------|------------------|-----------------------------------------------------------------------------------------------------------------------------------|------------------------|
| M80832P | ICD-10 Diagnosis | Other osteoporosis with current pathological fracture, left forearm subsequent encounter for fracture with malunion               | Osteoporosis Diagnosis |
| M80832S | ICD-10 Diagnosis | Other osteoporosis with current pathological fracture, left forearm sequela                                                       | Osteoporosis Diagnosis |
| M80839  | ICD-10 Diagnosis | Other osteoporosis with current pathological fracture, unspecified forearm                                                        | Osteoporosis Diagnosis |
| M80839A | ICD-10 Diagnosis | Other osteoporosis with current pathological fracture, unspecified forearm initial encounter for fracture                         | Osteoporosis Diagnosis |
| M80839D | ICD-10 Diagnosis | Other osteoporosis with current pathological fracture, unspecified forearm subsequent encounter for fracture with routine healing | Osteoporosis Diagnosis |
| M80839G | ICD-10 Diagnosis | Other osteoporosis with current pathological fracture, unspecified forearm subsequent encounter for fracture with delayed healing | Osteoporosis Diagnosis |
| M80839K | ICD-10 Diagnosis | Other osteoporosis with current pathological fracture, unspecified forearm subsequent encounter for fracture with nonunion        | Osteoporosis Diagnosis |
| M80839P | ICD-10 Diagnosis | Other osteoporosis with current pathological fracture, unspecified forearm subsequent encounter for fracture with malunion        | Osteoporosis Diagnosis |
| M80839S | ICD-10 Diagnosis | Other osteoporosis with current pathological fracture, unspecified forearm sequela                                                | Osteoporosis Diagnosis |
| M8084   | ICD-10 Diagnosis | Other osteoporosis with current pathological fracture, hand                                                                       | Osteoporosis Diagnosis |
| M80841  | ICD-10 Diagnosis | Other osteoporosis with current pathological fracture, right hand                                                                 | Osteoporosis Diagnosis |
| M80841A | ICD-10 Diagnosis | Other osteoporosis with current pathological fracture, right hand initial encounter for fracture                                  | Osteoporosis Diagnosis |
| M80841D | ICD-10 Diagnosis | Other osteoporosis with current pathological fracture, right hand subsequent encounter for fracture with routine healing          | Osteoporosis Diagnosis |

|         |                  |                                                                                                                          |                        |
|---------|------------------|--------------------------------------------------------------------------------------------------------------------------|------------------------|
| M80841G | ICD-10 Diagnosis | Other osteoporosis with current pathological fracture, right hand subsequent encounter for fracture with delayed healing | Osteoporosis Diagnosis |
| M80841K | ICD-10 Diagnosis | Other osteoporosis with current pathological fracture, right hand subsequent encounter for fracture with nonunion        | Osteoporosis Diagnosis |
| M80841P | ICD-10 Diagnosis | Other osteoporosis with current pathological fracture, right hand subsequent encounter for fracture with malunion        | Osteoporosis Diagnosis |
| M80841S | ICD-10 Diagnosis | Other osteoporosis with current pathological fracture, right hand sequela                                                | Osteoporosis Diagnosis |
| M80842  | ICD-10 Diagnosis | Other osteoporosis with current pathological fracture, left hand                                                         | Osteoporosis Diagnosis |
| M80842A | ICD-10 Diagnosis | Other osteoporosis with current pathological fracture, left hand initial encounter for fracture                          | Osteoporosis Diagnosis |
| M80842D | ICD-10 Diagnosis | Other osteoporosis with current pathological fracture, left hand subsequent encounter for fracture with routine healing  | Osteoporosis Diagnosis |
| M80842G | ICD-10 Diagnosis | Other osteoporosis with current pathological fracture, left hand subsequent encounter for fracture with delayed healing  | Osteoporosis Diagnosis |
| M80842K | ICD-10 Diagnosis | Other osteoporosis with current pathological fracture, left hand subsequent encounter for fracture with nonunion         | Osteoporosis Diagnosis |
| M80842P | ICD-10 Diagnosis | Other osteoporosis with current pathological fracture, left hand subsequent encounter for fracture with malunion         | Osteoporosis Diagnosis |
| M80842S | ICD-10 Diagnosis | Other osteoporosis with current pathological fracture, left hand sequela                                                 | Osteoporosis Diagnosis |
| M80849  | ICD-10 Diagnosis | Other osteoporosis with current pathological fracture, unspecified hand                                                  | Osteoporosis Diagnosis |
| M80849A | ICD-10 Diagnosis | Other osteoporosis with current pathological fracture, unspecified hand initial encounter for fracture                   | Osteoporosis Diagnosis |

|         |                  |                                                                                                                                |                        |
|---------|------------------|--------------------------------------------------------------------------------------------------------------------------------|------------------------|
| M80849D | ICD-10 Diagnosis | Other osteoporosis with current pathological fracture, unspecified hand subsequent encounter for fracture with routine healing | Osteoporosis Diagnosis |
| M80849G | ICD-10 Diagnosis | Other osteoporosis with current pathological fracture, unspecified hand subsequent encounter for fracture with delayed healing | Osteoporosis Diagnosis |
| M80849K | ICD-10 Diagnosis | Other osteoporosis with current pathological fracture, unspecified hand subsequent encounter for fracture with nonunion        | Osteoporosis Diagnosis |
| M80849P | ICD-10 Diagnosis | Other osteoporosis with current pathological fracture, unspecified hand subsequent encounter for fracture with malunion        | Osteoporosis Diagnosis |
| M80849S | ICD-10 Diagnosis | Other osteoporosis with current pathological fracture, unspecified hand sequela                                                | Osteoporosis Diagnosis |
| M8085   | ICD-10 Diagnosis | Other osteoporosis with current pathological fracture, femur                                                                   | Osteoporosis Diagnosis |
| M80851  | ICD-10 Diagnosis | Other osteoporosis with current pathological fracture, right femur                                                             | Osteoporosis Diagnosis |
| M80851A | ICD-10 Diagnosis | Other osteoporosis with current pathological fracture, right femur initial encounter for fracture                              | Osteoporosis Diagnosis |
| M80851D | ICD-10 Diagnosis | Other osteoporosis with current pathological fracture, right femur subsequent encounter for fracture with routine healing      | Osteoporosis Diagnosis |
| M80851G | ICD-10 Diagnosis | Other osteoporosis with current pathological fracture, right femur subsequent encounter for fracture with delayed healing      | Osteoporosis Diagnosis |
| M80851K | ICD-10 Diagnosis | Other osteoporosis with current pathological fracture, right femur subsequent encounter for fracture with nonunion             | Osteoporosis Diagnosis |
| M80851P | ICD-10 Diagnosis | Other osteoporosis with current pathological fracture, right femur subsequent encounter for fracture with malunion             | Osteoporosis Diagnosis |



|         |                  |                                                                                                                                 |                        |
|---------|------------------|---------------------------------------------------------------------------------------------------------------------------------|------------------------|
| M80851S | ICD-10 Diagnosis | Other osteoporosis with current pathological fracture, right femur sequela                                                      | Osteoporosis Diagnosis |
| M80852  | ICD-10 Diagnosis | Other osteoporosis with current pathological fracture, left femur                                                               | Osteoporosis Diagnosis |
| M80852A | ICD-10 Diagnosis | Other osteoporosis with current pathological fracture, left femur initial encounter for fracture                                | Osteoporosis Diagnosis |
| M80852A | ICD-10 Diagnosis | Other osteoporosis with current pathological fracture, left femur                                                               | Osteoporosis Diagnosis |
| M80852D | ICD-10 Diagnosis | Other osteoporosis with current pathological fracture, left femur subsequent encounter for fracture with routine healing        | Osteoporosis Diagnosis |
| M80852G | ICD-10 Diagnosis | Other osteoporosis with current pathological fracture, left femur subsequent encounter for fracture with delayed healing        | Osteoporosis Diagnosis |
| M80852K | ICD-10 Diagnosis | Other osteoporosis with current pathological fracture, left femur subsequent encounter for fracture with nonunion               | Osteoporosis Diagnosis |
| M80852P | ICD-10 Diagnosis | Other osteoporosis with current pathological fracture, left femur subsequent encounter for fracture with malunion               | Osteoporosis Diagnosis |
| M80852S | ICD-10 Diagnosis | Other osteoporosis with current pathological fracture, left femur sequela                                                       | Osteoporosis Diagnosis |
| M80859  | ICD-10 Diagnosis | Other osteoporosis with current pathological fracture, unspecified femur                                                        | Osteoporosis Diagnosis |
| M80859A | ICD-10 Diagnosis | Other osteoporosis with current pathological fracture, unspecified femur initial encounter for fracture                         | Osteoporosis Diagnosis |
| M80859D | ICD-10 Diagnosis | Other osteoporosis with current pathological fracture, unspecified femur subsequent encounter for fracture with routine healing | Osteoporosis Diagnosis |
| M80859G | ICD-10 Diagnosis | Other osteoporosis with current pathological fracture, unspecified femur subsequent encounter for fracture with delayed healing | Osteoporosis Diagnosis |

|         |                  |                                                                                                                               |                        |
|---------|------------------|-------------------------------------------------------------------------------------------------------------------------------|------------------------|
| M80859K | ICD-10 Diagnosis | Other osteoporosis with current pathological fracture, unspecified femur subsequent encounter for fracture with nonunion      | Osteoporosis Diagnosis |
| M80859P | ICD-10 Diagnosis | Other osteoporosis with current pathological fracture, unspecified femur subsequent encounter for fracture with malunion      | Osteoporosis Diagnosis |
| M80859S | ICD-10 Diagnosis | Other osteoporosis with current pathological fracture, unspecified femur sequela                                              | Osteoporosis Diagnosis |
| M8086   | ICD-10 Diagnosis | Other osteoporosis with current pathological fracture, lower leg                                                              | Osteoporosis Diagnosis |
| M80861  | ICD-10 Diagnosis | Other osteoporosis with current pathological fracture, right lower leg                                                        | Osteoporosis Diagnosis |
| M80861A | ICD-10 Diagnosis | Other osteoporosis with current pathological fracture, right lower leg initial encounter for fracture                         | Osteoporosis Diagnosis |
| M80861D | ICD-10 Diagnosis | Other osteoporosis with current pathological fracture, right lower leg subsequent encounter for fracture with routine healing | Osteoporosis Diagnosis |
| M80861G | ICD-10 Diagnosis | Other osteoporosis with current pathological fracture, right lower leg subsequent encounter for fracture with delayed healing | Osteoporosis Diagnosis |
| M80861K | ICD-10 Diagnosis | Other osteoporosis with current pathological fracture, right lower leg subsequent encounter for fracture with nonunion        | Osteoporosis Diagnosis |
| M80861P | ICD-10 Diagnosis | Other osteoporosis with current pathological fracture, right lower leg subsequent encounter for fracture with malunion        | Osteoporosis Diagnosis |
| M80861S | ICD-10 Diagnosis | Other osteoporosis with current pathological fracture, right lower leg sequela                                                | Osteoporosis Diagnosis |
| M80862  | ICD-10 Diagnosis | Other osteoporosis with current pathological fracture, left lower leg                                                         | Osteoporosis Diagnosis |
| M80862A | ICD-10 Diagnosis | Other osteoporosis with current pathological fracture, left lower leg initial encounter for fracture                          | Osteoporosis Diagnosis |
| M80862D | ICD-10 Diagnosis | Other osteoporosis with current pathological fracture, left lower leg subsequent encounter for fracture with routine healing  | Osteoporosis Diagnosis |

|         |                  |                                                                                                                                     |                        |
|---------|------------------|-------------------------------------------------------------------------------------------------------------------------------------|------------------------|
| M80862G | ICD-10 Diagnosis | Other osteoporosis with current pathological fracture, left lower leg subsequent encounter for fracture with delayed healing        | Osteoporosis Diagnosis |
| M80862K | ICD-10 Diagnosis | Other osteoporosis with current pathological fracture, left lower leg subsequent encounter for fracture with nonunion               | Osteoporosis Diagnosis |
| M80862P | ICD-10 Diagnosis | Other osteoporosis with current pathological fracture, left lower leg subsequent encounter for fracture with malunion               | Osteoporosis Diagnosis |
| M80862S | ICD-10 Diagnosis | Other osteoporosis with current pathological fracture, left lower leg sequela                                                       | Osteoporosis Diagnosis |
| M80869  | ICD-10 Diagnosis | Other osteoporosis with current pathological fracture, unspecified lower leg                                                        | Osteoporosis Diagnosis |
| M80869A | ICD-10 Diagnosis | Other osteoporosis with current pathological fracture, unspecified lower leg initial encounter for fracture                         | Osteoporosis Diagnosis |
| M80869D | ICD-10 Diagnosis | Other osteoporosis with current pathological fracture, unspecified lower leg subsequent encounter for fracture with routine healing | Osteoporosis Diagnosis |
| M80869G | ICD-10 Diagnosis | Other osteoporosis with current pathological fracture, unspecified lower leg subsequent encounter for fracture with delayed healing | Osteoporosis Diagnosis |
| M80869K | ICD-10 Diagnosis | Other osteoporosis with current pathological fracture, unspecified lower leg subsequent encounter for fracture with nonunion        | Osteoporosis Diagnosis |
| M80869P | ICD-10 Diagnosis | Other osteoporosis with current pathological fracture, unspecified lower leg subsequent encounter for fracture with malunion        | Osteoporosis Diagnosis |
| M80869S | ICD-10 Diagnosis | Other osteoporosis with current pathological fracture, unspecified lower leg sequela                                                | Osteoporosis Diagnosis |
| M8087   | ICD-10 Diagnosis | Other osteoporosis with current pathological fracture, ankle and foot                                                               | Osteoporosis Diagnosis |
| M80871  | ICD-10 Diagnosis | Other osteoporosis with current pathological fracture, right ankle and foot                                                         | Osteoporosis Diagnosis |

|         |                  |                                                                                                                                    |                        |
|---------|------------------|------------------------------------------------------------------------------------------------------------------------------------|------------------------|
| M80871A | ICD-10 Diagnosis | Other osteoporosis with current pathological fracture, right ankle and foot initial encounter for fracture                         | Osteoporosis Diagnosis |
| M80871D | ICD-10 Diagnosis | Other osteoporosis with current pathological fracture, right ankle and foot subsequent encounter for fracture with routine healing | Osteoporosis Diagnosis |
| M80871G | ICD-10 Diagnosis | Other osteoporosis with current pathological fracture, right ankle and foot subsequent encounter for fracture with delayed healing | Osteoporosis Diagnosis |
| M80871K | ICD-10 Diagnosis | Other osteoporosis with current pathological fracture, right ankle and foot subsequent encounter for fracture with nonunion        | Osteoporosis Diagnosis |
| M80871P | ICD-10 Diagnosis | Other osteoporosis with current pathological fracture, right ankle and foot subsequent encounter for fracture with malunion        | Osteoporosis Diagnosis |
| M80871S | ICD-10 Diagnosis | Other osteoporosis with current pathological fracture, right ankle and foot sequela                                                | Osteoporosis Diagnosis |
| M80872  | ICD-10 Diagnosis | Other osteoporosis with current pathological fracture, left ankle and foot                                                         | Osteoporosis Diagnosis |
| M80872A | ICD-10 Diagnosis | Other osteoporosis with current pathological fracture, left ankle and foot initial encounter for fracture                          | Osteoporosis Diagnosis |
| M80872D | ICD-10 Diagnosis | Other osteoporosis with current pathological fracture, left ankle and foot subsequent encounter for fracture with routine healing  | Osteoporosis Diagnosis |
| M80872G | ICD-10 Diagnosis | Other osteoporosis with current pathological fracture, left ankle and foot subsequent encounter for fracture with delayed healing  | Osteoporosis Diagnosis |
| M80872K | ICD-10 Diagnosis | Other osteoporosis with current pathological fracture, left ankle and foot subsequent encounter for fracture with nonunion         | Osteoporosis Diagnosis |
| M80872P | ICD-10 Diagnosis | Other osteoporosis with current pathological fracture, left ankle and foot subsequent encounter for fracture with malunion         | Osteoporosis Diagnosis |

|         |                  |                                                                                                                                          |                        |
|---------|------------------|------------------------------------------------------------------------------------------------------------------------------------------|------------------------|
| M80872S | ICD-10 Diagnosis | Other osteoporosis with current pathological fracture, left ankle and foot sequela                                                       | Osteoporosis Diagnosis |
| M80879  | ICD-10 Diagnosis | Other osteoporosis with current pathological fracture, unspecified ankle and foot                                                        | Osteoporosis Diagnosis |
| M80879A | ICD-10 Diagnosis | Other osteoporosis with current pathological fracture, unspecified ankle and foot initial encounter for fracture                         | Osteoporosis Diagnosis |
| M80879D | ICD-10 Diagnosis | Other osteoporosis with current pathological fracture, unspecified ankle and foot subsequent encounter for fracture with routine healing | Osteoporosis Diagnosis |
| M80879G | ICD-10 Diagnosis | Other osteoporosis with current pathological fracture, unspecified ankle and foot subsequent encounter for fracture with delayed healing | Osteoporosis Diagnosis |
| M80879K | ICD-10 Diagnosis | Other osteoporosis with current pathological fracture, unspecified ankle and foot subsequent encounter for fracture with nonunion        | Osteoporosis Diagnosis |
| M80879P | ICD-10 Diagnosis | Other osteoporosis with current pathological fracture, unspecified ankle and foot subsequent encounter for fracture with malunion        | Osteoporosis Diagnosis |
| M80879S | ICD-10 Diagnosis | Other osteoporosis with current pathological fracture, unspecified ankle and foot sequela                                                | Osteoporosis Diagnosis |
| M8088   | ICD-10 Diagnosis | Other osteoporosis with current pathological fracture, vertebra(e)                                                                       | Osteoporosis Diagnosis |
| M8088XA | ICD-10 Diagnosis | Other osteoporosis with current pathological fracture, vertebra(e)                                                                       | Osteoporosis Diagnosis |
| M8088XD | ICD-10 Diagnosis | Other osteoporosis with current pathological fracture, vertebra(e)                                                                       | Osteoporosis Diagnosis |
| M8088XG | ICD-10 Diagnosis | Other osteoporosis with current pathological fracture, vertebra(e)                                                                       | Osteoporosis Diagnosis |
| M8088XK | ICD-10 Diagnosis | Other osteoporosis with current pathological fracture, vertebra(e)                                                                       | Osteoporosis Diagnosis |
| M8088PS | ICD-10 Diagnosis | Other osteoporosis with current pathological fracture, vertebra(e)                                                                       | Osteoporosis Diagnosis |
| M8088XS | ICD-10 Diagnosis | Other osteoporosis with current pathological fracture, vertebra(e)                                                                       | Osteoporosis Diagnosis |
| M810    | ICD-10 Diagnosis | Age-related osteoporosis without current pathological fracture                                                                           | Osteoporosis Diagnosis |

|        |                  |                                                                       |                        |
|--------|------------------|-----------------------------------------------------------------------|------------------------|
| M818   | ICD-10 Diagnosis | Other osteoporosis without current pathological fracture              | Osteoporosis Diagnosis |
| Z87310 | ICD-10 Diagnosis | Personal history of (healed) osteoporosis fracture                    | Osteoporosis Diagnosis |
| C001   | ICD-10 Diagnosis | Malignant neoplasm of external lower lip                              | Neoplasm               |
| C009   | ICD-10 Diagnosis | Malignant neoplasm of lip, unspecified                                | Neoplasm               |
| C01    | ICD-10 Diagnosis | Malignant neoplasm of base of tongue                                  | Neoplasm               |
| C020   | ICD-10 Diagnosis | Malignant neoplasm of dorsal surface of tongue                        | Neoplasm               |
| C022   | ICD-10 Diagnosis | Malignant neoplasm of ventral surface of tongue                       | Neoplasm               |
| C023   | ICD-10 Diagnosis | Malignant neoplasm of anterior two-thirds of tongue, part unspecified | Neoplasm               |
| C024   | ICD-10 Diagnosis | Malignant neoplasm of lingual tonsil                                  | Neoplasm               |
| C028   | ICD-10 Diagnosis | Malignant neoplasm of overlapping sites of tongue                     | Neoplasm               |
| C029   | ICD-10 Diagnosis | Malignant neoplasm of tongue, unspecified                             | Neoplasm               |
| C030   | ICD-10 Diagnosis | Malignant neoplasm of upper gum                                       | Neoplasm               |
| C031   | ICD-10 Diagnosis | Malignant neoplasm of lower gum                                       | Neoplasm               |
| C039   | ICD-10 Diagnosis | Malignant neoplasm of gum, unspecified                                | Neoplasm               |
| C040   | ICD-10 Diagnosis | Malignant neoplasm of anterior floor of mouth                         | Neoplasm               |
| C049   | ICD-10 Diagnosis | Malignant neoplasm of floor of mouth, unspecified                     | Neoplasm               |
| C050   | ICD-10 Diagnosis | Malignant neoplasm of hard palate                                     | Neoplasm               |
| C051   | ICD-10 Diagnosis | Malignant neoplasm of soft palate                                     | Neoplasm               |
| C059   | ICD-10 Diagnosis | Malignant neoplasm of palate, unspecified                             | Neoplasm               |
| C060   | ICD-10 Diagnosis | Malignant neoplasm of cheek mucosa                                    | Neoplasm               |
| C061   | ICD-10 Diagnosis | Malignant neoplasm of vestibule of mouth                              | Neoplasm               |
| C062   | ICD-10 Diagnosis | Malignant neoplasm of retromolar area                                 | Neoplasm               |
| C069   | ICD-10 Diagnosis | Malignant neoplasm of mouth, unspecified                              | Neoplasm               |
| C07    | ICD-10 Diagnosis | Malignant neoplasm of parotid gland                                   | Neoplasm               |
| C080   | ICD-10 Diagnosis | Malignant neoplasm of submandibular gland                             | Neoplasm               |

|      |                  |                                                                         |          |
|------|------------------|-------------------------------------------------------------------------|----------|
| C081 | ICD-10 Diagnosis | Malignant neoplasm of sublingual gland                                  | Neoplasm |
| C089 | ICD-10 Diagnosis | Malignant neoplasm of major salivary gland, unspecified                 | Neoplasm |
| C091 | ICD-10 Diagnosis | Malignant neoplasm of tonsillar pillar (anterior) (posterior)           | Neoplasm |
| C098 | ICD-10 Diagnosis | Malignant neoplasm of overlapping sites of tonsil                       | Neoplasm |
| C099 | ICD-10 Diagnosis | Malignant neoplasm of tonsil, unspecified                               | Neoplasm |
| C10  | ICD-10 Diagnosis | Malignant neoplasm of oropharynx                                        | Neoplasm |
| C100 | ICD-10 Diagnosis | Malignant neoplasm of vallecula                                         | Neoplasm |
| C101 | ICD-10 Diagnosis | Malignant neoplasm of anterior surface of epiglottis                    | Neoplasm |
| C102 | ICD-10 Diagnosis | Malignant neoplasm of lateral wall of oropharynx                        | Neoplasm |
| C103 | ICD-10 Diagnosis | Malignant neoplasm of posterior wall of oropharynx                      | Neoplasm |
| C108 | ICD-10 Diagnosis | Malignant neoplasm of overlapping sites of oropharynx                   | Neoplasm |
| C109 | ICD-10 Diagnosis | Malignant neoplasm of oropharynx, unspecified                           | Neoplasm |
| C111 | ICD-10 Diagnosis | Malignant neoplasm of posterior wall of nasopharynx                     | Neoplasm |
| C118 | ICD-10 Diagnosis | Malignant neoplasm of overlapping sites of nasopharynx                  | Neoplasm |
| C119 | ICD-10 Diagnosis | Malignant neoplasm of nasopharynx, unspecified                          | Neoplasm |
| C12  | ICD-10 Diagnosis | Malignant neoplasm of pyriform sinus                                    | Neoplasm |
| C130 | ICD-10 Diagnosis | Malignant neoplasm of postcricoid region                                | Neoplasm |
| C131 | ICD-10 Diagnosis | Malignant neoplasm of aryepiglottic fold, hypopharyngeal aspect         | Neoplasm |
| C132 | ICD-10 Diagnosis | Malignant neoplasm of posterior wall of hypopharynx                     | Neoplasm |
| C138 | ICD-10 Diagnosis | Malignant neoplasm of overlapping sites of hypopharynx                  | Neoplasm |
| C139 | ICD-10 Diagnosis | Malignant neoplasm of hypopharynx, unspecified                          | Neoplasm |
| C140 | ICD-10 Diagnosis | Malignant neoplasm of pharynx, unspecified                              | Neoplasm |
| C148 | ICD-10 Diagnosis | Malignant neoplasm of overlapping sites of lip, oral cavity and pharynx | Neoplasm |
| C153 | ICD-10 Diagnosis | Malignant neoplasm of upper third of esophagus                          | Neoplasm |

|      |                  |                                                                 |          |
|------|------------------|-----------------------------------------------------------------|----------|
| C154 | ICD-10 Diagnosis | Malignant neoplasm of middle third of esophagus                 | Neoplasm |
| C155 | ICD-10 Diagnosis | Malignant neoplasm of lower third of esophagus                  | Neoplasm |
| C158 | ICD-10 Diagnosis | Malignant neoplasm of overlapping sites of esophagus            | Neoplasm |
| C159 | ICD-10 Diagnosis | Malignant neoplasm of esophagus, unspecified                    | Neoplasm |
| C160 | ICD-10 Diagnosis | Malignant neoplasm of cardia                                    | Neoplasm |
| C162 | ICD-10 Diagnosis | Malignant neoplasm of body of stomach                           | Neoplasm |
| C163 | ICD-10 Diagnosis | Malignant neoplasm of pyloric antrum                            | Neoplasm |
| C165 | ICD-10 Diagnosis | Malignant neoplasm of lesser curvature of stomach, unspecified  | Neoplasm |
| C166 | ICD-10 Diagnosis | Malignant neoplasm of greater curvature of stomach, unspecified | Neoplasm |
| C168 | ICD-10 Diagnosis | Malignant neoplasm of overlapping sites of stomach              | Neoplasm |
| C169 | ICD-10 Diagnosis | Malignant neoplasm of stomach, unspecified                      | Neoplasm |
| C170 | ICD-10 Diagnosis | Malignant neoplasm of duodenum                                  | Neoplasm |
| C171 | ICD-10 Diagnosis | Malignant neoplasm of jejunum                                   | Neoplasm |
| C172 | ICD-10 Diagnosis | Malignant neoplasm of ileum                                     | Neoplasm |
| C178 | ICD-10 Diagnosis | Malignant neoplasm of overlapping sites of small intestine      | Neoplasm |
| C179 | ICD-10 Diagnosis | Malignant neoplasm of small intestine, unspecified              | Neoplasm |
| C180 | ICD-10 Diagnosis | Malignant neoplasm of cecum                                     | Neoplasm |
| C181 | ICD-10 Diagnosis | Malignant neoplasm of appendix                                  | Neoplasm |
| C182 | ICD-10 Diagnosis | Malignant neoplasm of ascending colon                           | Neoplasm |
| C183 | ICD-10 Diagnosis | Malignant neoplasm of hepatic flexure                           | Neoplasm |
| C184 | ICD-10 Diagnosis | Malignant neoplasm of transverse colon                          | Neoplasm |
| C185 | ICD-10 Diagnosis | Malignant neoplasm of splenic flexure                           | Neoplasm |
| C186 | ICD-10 Diagnosis | Malignant neoplasm of descending colon                          | Neoplasm |
| C187 | ICD-10 Diagnosis | Malignant neoplasm of sigmoid colon                             | Neoplasm |
| C188 | ICD-10 Diagnosis | Malignant neoplasm of overlapping sites of colon                | Neoplasm |
| C189 | ICD-10 Diagnosis | Malignant neoplasm of colon, unspecified                        | Neoplasm |



|      |                  |                                                                        |          |
|------|------------------|------------------------------------------------------------------------|----------|
|      |                  | Malignant neoplasm of rectosigmoid junction                            | Neoplasm |
| C19  | ICD-10 Diagnosis |                                                                        |          |
| C20  | ICD-10 Diagnosis | Malignant neoplasm of rectum                                           | Neoplasm |
| C210 | ICD-10 Diagnosis | Malignant neoplasm of anus, unspecified                                | Neoplasm |
| C211 | ICD-10 Diagnosis | Malignant neoplasm of anal canal                                       | Neoplasm |
| C218 | ICD-10 Diagnosis | Malignant neoplasm of overlapping sites of rectum, anus and anal canal | Neoplasm |
| C220 | ICD-10 Diagnosis | Liver cell carcinoma                                                   | Neoplasm |
| C221 | ICD-10 Diagnosis | Intrahepatic bile duct carcinoma                                       | Neoplasm |
| C227 | ICD-10 Diagnosis | Other specified carcinomas of liver                                    | Neoplasm |
| C228 | ICD-10 Diagnosis | Malignant neoplasm of liver, primary, unspecified as to type           | Neoplasm |
| C229 | ICD-10 Diagnosis | Malignant neoplasm of liver, not specified as primary or secondary     | Neoplasm |
| C23  | ICD-10 Diagnosis | Malignant neoplasm of gallbladder                                      | Neoplasm |
| C240 | ICD-10 Diagnosis | Malignant neoplasm of extrahepatic bile duct                           | Neoplasm |
| C241 | ICD-10 Diagnosis | Malignant neoplasm of ampulla of Vater                                 | Neoplasm |
| C249 | ICD-10 Diagnosis | Malignant neoplasm of biliary tract, unspecified                       | Neoplasm |
| C250 | ICD-10 Diagnosis | Malignant neoplasm of head of pancreas                                 | Neoplasm |
| C251 | ICD-10 Diagnosis | Malignant neoplasm of body of pancreas                                 | Neoplasm |
| C252 | ICD-10 Diagnosis | Malignant neoplasm of tail of pancreas                                 | Neoplasm |
| C253 | ICD-10 Diagnosis | Malignant neoplasm of pancreatic duct                                  | Neoplasm |
| C254 | ICD-10 Diagnosis | Malignant neoplasm of endocrine pancreas                               | Neoplasm |
| C257 | ICD-10 Diagnosis | Malignant neoplasm of other parts of pancreas                          | Neoplasm |
| C258 | ICD-10 Diagnosis | Malignant neoplasm of overlapping sites of pancreas                    | Neoplasm |
| C259 | ICD-10 Diagnosis | Malignant neoplasm of pancreas, unspecified                            | Neoplasm |
| C260 | ICD-10 Diagnosis | Malignant neoplasm of intestinal tract, part unspecified               | Neoplasm |
| C269 | ICD-10 Diagnosis | Malignant neoplasm of ill-defined sites within the digestive system    | Neoplasm |
| C300 | ICD-10 Diagnosis | Malignant neoplasm of nasal cavity                                     | Neoplasm |
| C301 | ICD-10 Diagnosis | Malignant neoplasm of middle ear                                       | Neoplasm |
| C310 | ICD-10 Diagnosis | Malignant neoplasm of maxillary sinus                                  | Neoplasm |

|       |                  |                                                                          |          |
|-------|------------------|--------------------------------------------------------------------------|----------|
| C311  | ICD-10 Diagnosis | Malignant neoplasm of ethmoidal sinus                                    | Neoplasm |
| C313  | ICD-10 Diagnosis | Malignant neoplasm of sphenoid sinus                                     | Neoplasm |
| C319  | ICD-10 Diagnosis | Malignant neoplasm of accessory sinus, unspecified                       | Neoplasm |
| C320  | ICD-10 Diagnosis | Malignant neoplasm of glottis                                            | Neoplasm |
| C321  | ICD-10 Diagnosis | Malignant neoplasm of supraglottis                                       | Neoplasm |
| C323  | ICD-10 Diagnosis | Malignant neoplasm of laryngeal cartilage                                | Neoplasm |
| C328  | ICD-10 Diagnosis | Malignant neoplasm of overlapping sites of larynx                        | Neoplasm |
| C329  | ICD-10 Diagnosis | Malignant neoplasm of larynx, unspecified                                | Neoplasm |
| C33   | ICD-10 Diagnosis | Malignant neoplasm of trachea                                            | Neoplasm |
| C3400 | ICD-10 Diagnosis | Malignant neoplasm of unspecified main bronchus                          | Neoplasm |
| C3401 | ICD-10 Diagnosis | Malignant neoplasm of right main bronchus                                | Neoplasm |
| C3402 | ICD-10 Diagnosis | Malignant neoplasm of left main bronchus                                 | Neoplasm |
| C3410 | ICD-10 Diagnosis | Malignant neoplasm of upper lobe, unspecified bronchus or lung           | Neoplasm |
| C3411 | ICD-10 Diagnosis | Malignant neoplasm of upper lobe, right bronchus or lung                 | Neoplasm |
| C3412 | ICD-10 Diagnosis | Malignant neoplasm of upper lobe, left bronchus or lung                  | Neoplasm |
| C342  | ICD-10 Diagnosis | Malignant neoplasm of middle lobe, bronchus or lung                      | Neoplasm |
| C3430 | ICD-10 Diagnosis | Malignant neoplasm of lower lobe, unspecified bronchus or lung           | Neoplasm |
| C3431 | ICD-10 Diagnosis | Malignant neoplasm of lower lobe, right bronchus or lung                 | Neoplasm |
| C3432 | ICD-10 Diagnosis | Malignant neoplasm of lower lobe, left bronchus or lung                  | Neoplasm |
| C3480 | ICD-10 Diagnosis | Malignant neoplasm of overlapping sites of unspecified bronchus and lung | Neoplasm |
| C3481 | ICD-10 Diagnosis | Malignant neoplasm of overlapping sites of right bronchus and lung       | Neoplasm |
| C3482 | ICD-10 Diagnosis | Malignant neoplasm of overlapping sites of left bronchus and lung        | Neoplasm |
| C3490 | ICD-10 Diagnosis | Malignant neoplasm of unspecified part of unspecified bronchus or lung   | Neoplasm |
| C3491 | ICD-10 Diagnosis | Malignant neoplasm of unspecified part of right bronchus or lung         | Neoplasm |

|       |                  |                                          |          |
|-------|------------------|------------------------------------------|----------|
|       |                  | Malignant neoplasm of unspecified part   |          |
| C3492 | ICD-10 Diagnosis | of left bronchus or lung                 | Neoplasm |
| C37   | ICD-10 Diagnosis | Malignant neoplasm of thymus             | Neoplasm |
| C380  | ICD-10 Diagnosis | Malignant neoplasm of heart              | Neoplasm |
|       |                  | Malignant neoplasm of anterior           |          |
| C381  | ICD-10 Diagnosis | mediastinum                              | Neoplasm |
|       |                  | Malignant neoplasm of posterior          |          |
| C382  | ICD-10 Diagnosis | mediastinum                              | Neoplasm |
|       |                  | Malignant neoplasm of mediastinum,       |          |
| C383  | ICD-10 Diagnosis | part unspecified                         | Neoplasm |
| C384  | ICD-10 Diagnosis | Malignant neoplasm of pleura             | Neoplasm |
|       |                  | Malignant neoplasm of upper respiratory  |          |
| C390  | ICD-10 Diagnosis | tract, part unspecified                  | Neoplasm |
|       |                  | Malignant neoplasm of lower respiratory  |          |
| C399  | ICD-10 Diagnosis | tract, part unspecified                  | Neoplasm |
|       |                  | Malignant neoplasm of scapula and long   |          |
| C4000 | ICD-10 Diagnosis | bones of unspecified upper limb          | Neoplasm |
|       |                  | Malignant neoplasm of scapula and long   |          |
| C4001 | ICD-10 Diagnosis | bones of right upper limb                | Neoplasm |
|       |                  | Malignant neoplasm of scapula and long   |          |
| C4002 | ICD-10 Diagnosis | bones of left upper limb                 | Neoplasm |
|       |                  | Malignant neoplasm of short bones of     |          |
| C4012 | ICD-10 Diagnosis | left upper limb                          | Neoplasm |
|       |                  | Malignant neoplasm of long bones of      |          |
| C4021 | ICD-10 Diagnosis | right lower limb                         | Neoplasm |
|       |                  | Malignant neoplasm of long bones of left |          |
| C4022 | ICD-10 Diagnosis | lower limb                               | Neoplasm |
|       |                  | Malignant neoplasm of bones of skull and |          |
| C410  | ICD-10 Diagnosis | face                                     | Neoplasm |
| C411  | ICD-10 Diagnosis | Malignant neoplasm of mandible           | Neoplasm |
|       |                  | Malignant neoplasm of vertebral column   |          |
| C412  | ICD-10 Diagnosis | Malignant neoplasm of ribs, sternum and  | Neoplasm |
|       |                  | clavicle                                 |          |
| C413  | ICD-10 Diagnosis | Malignant neoplasm of pelvic bones,      | Neoplasm |
|       |                  | sacrum and coccyx                        |          |
| C414  | ICD-10 Diagnosis | Malignant neoplasm of bone and           | Neoplasm |
|       |                  | articular cartilage, unspecified         |          |
| C419  | ICD-10 Diagnosis | Malignant melanoma of right eyelid,      | Neoplasm |
|       |                  | including canthus                        |          |
| C4311 | ICD-10 Diagnosis | Malignant melanoma of right ear and      | Neoplasm |
|       |                  | external auricular canal                 |          |
| C4321 | ICD-10 Diagnosis | Malignant melanoma of left ear and       | Neoplasm |
|       |                  | external auricular canal                 |          |
| C4322 | ICD-10 Diagnosis | Malignant melanoma of unspecified part   | Neoplasm |
|       |                  | of face                                  |          |
| C4330 | ICD-10 Diagnosis |                                          | Neoplasm |

|       |                  |                                                                                       |          |
|-------|------------------|---------------------------------------------------------------------------------------|----------|
| C4331 | ICD-10 Diagnosis | Malignant melanoma of nose                                                            | Neoplasm |
| C4339 | ICD-10 Diagnosis | Malignant melanoma of other parts of face                                             | Neoplasm |
| C434  | ICD-10 Diagnosis | Malignant melanoma of scalp and neck                                                  | Neoplasm |
| C4359 | ICD-10 Diagnosis | Malignant melanoma of other part of trunk                                             | Neoplasm |
| C4360 | ICD-10 Diagnosis | Malignant melanoma of unspecified upper limb, including shoulder                      | Neoplasm |
| C4361 | ICD-10 Diagnosis | Malignant melanoma of right upper limb, including shoulder                            | Neoplasm |
| C4362 | ICD-10 Diagnosis | Malignant melanoma of left upper limb, including shoulder                             | Neoplasm |
| C4370 | ICD-10 Diagnosis | Malignant melanoma of unspecified lower limb, including hip                           | Neoplasm |
| C4371 | ICD-10 Diagnosis | Malignant melanoma of right lower limb, including hip                                 | Neoplasm |
| C4372 | ICD-10 Diagnosis | Malignant melanoma of left lower limb, including hip                                  | Neoplasm |
| C439  | ICD-10 Diagnosis | Malignant melanoma of skin, unspecified                                               | Neoplasm |
| C450  | ICD-10 Diagnosis | Mesothelioma of pleura                                                                | Neoplasm |
| C451  | ICD-10 Diagnosis | Mesothelioma of peritoneum                                                            | Neoplasm |
| C457  | ICD-10 Diagnosis | Mesothelioma of other sites                                                           | Neoplasm |
| C459  | ICD-10 Diagnosis | Mesothelioma, unspecified                                                             | Neoplasm |
| C460  | ICD-10 Diagnosis | Kaposi's sarcoma of skin                                                              | Neoplasm |
| C461  | ICD-10 Diagnosis | Kaposi's sarcoma of soft tissue                                                       | Neoplasm |
| C463  | ICD-10 Diagnosis | Kaposi's sarcoma of lymph nodes                                                       | Neoplasm |
| C467  | ICD-10 Diagnosis | Kaposi's sarcoma of other sites                                                       | Neoplasm |
| C469  | ICD-10 Diagnosis | Kaposi's sarcoma, unspecified                                                         | Neoplasm |
| C4710 | ICD-10 Diagnosis | Malignant neoplasm of peripheral nerves of unspecified upper limb, including shoulder | Neoplasm |
| C4721 | ICD-10 Diagnosis | Malignant neoplasm of peripheral nerves of right lower limb, including hip            | Neoplasm |
| C473  | ICD-10 Diagnosis | Malignant neoplasm of peripheral nerves of thorax                                     | Neoplasm |
| C475  | ICD-10 Diagnosis | Malignant neoplasm of peripheral nerves of pelvis                                     | Neoplasm |
| C479  | ICD-10 Diagnosis | Malignant neoplasm of peripheral nerves and autonomic nervous system, unspecified     | Neoplasm |
| C480  | ICD-10 Diagnosis | Malignant neoplasm of retroperitoneum                                                 | Neoplasm |
| C481  | ICD-10 Diagnosis | Malignant neoplasm of specified parts of peritoneum                                   | Neoplasm |

|        |                  |                                                                                           |          |
|--------|------------------|-------------------------------------------------------------------------------------------|----------|
| C482   | ICD-10 Diagnosis | Malignant neoplasm of peritoneum, unspecified                                             | Neoplasm |
| C490   | ICD-10 Diagnosis | Malignant neoplasm of connective and soft tissue of head, face and neck                   | Neoplasm |
| C4911  | ICD-10 Diagnosis | Malignant neoplasm of connective and soft tissue of right upper limb, including shoulder  | Neoplasm |
| C4912  | ICD-10 Diagnosis | Malignant neoplasm of connective and soft tissue of left upper limb, including shoulder   | Neoplasm |
| C4920  | ICD-10 Diagnosis | Malignant neoplasm of connective and soft tissue of unspecified lower limb, including hip | Neoplasm |
| C4921  | ICD-10 Diagnosis | Malignant neoplasm of connective and soft tissue of right lower limb, including hip       | Neoplasm |
| C4922  | ICD-10 Diagnosis | Malignant neoplasm of connective and soft tissue of left lower limb, including hip        | Neoplasm |
| C493   | ICD-10 Diagnosis | Malignant neoplasm of connective and soft tissue of thorax                                | Neoplasm |
| C494   | ICD-10 Diagnosis | Malignant neoplasm of connective and soft tissue of abdomen                               | Neoplasm |
| C495   | ICD-10 Diagnosis | Malignant neoplasm of connective and soft tissue of pelvis                                | Neoplasm |
| C496   | ICD-10 Diagnosis | Malignant neoplasm of connective and soft tissue of trunk, unspecified                    | Neoplasm |
| C499   | ICD-10 Diagnosis | Malignant neoplasm of connective and soft tissue, unspecified                             | Neoplasm |
| C50011 | ICD-10 Diagnosis | Malignant neoplasm of nipple and areola, right female breast                              | Neoplasm |
| C50012 | ICD-10 Diagnosis | Malignant neoplasm of nipple and areola, left female breast                               | Neoplasm |
| C50019 | ICD-10 Diagnosis | Malignant neoplasm of nipple and areola, unspecified female breast                        | Neoplasm |
| C50111 | ICD-10 Diagnosis | Malignant neoplasm of central portion of right female breast                              | Neoplasm |
| C50112 | ICD-10 Diagnosis | Malignant neoplasm of central portion of left female breast                               | Neoplasm |
| C50119 | ICD-10 Diagnosis | Malignant neoplasm of central portion of unspecified female breast                        | Neoplasm |
| C50211 | ICD-10 Diagnosis | Malignant neoplasm of upper-inner quadrant of right female breast                         | Neoplasm |
| C50212 | ICD-10 Diagnosis | Malignant neoplasm of upper-inner quadrant of left female breast                          | Neoplasm |

|        |                  |                                                                         |          |
|--------|------------------|-------------------------------------------------------------------------|----------|
| C50219 | ICD-10 Diagnosis | Malignant neoplasm of upper-inner quadrant of unspecified female breast | Neoplasm |
| C50311 | ICD-10 Diagnosis | Malignant neoplasm of lower-inner quadrant of right female breast       | Neoplasm |
| C50312 | ICD-10 Diagnosis | Malignant neoplasm of lower-inner quadrant of left female breast        | Neoplasm |
| C50319 | ICD-10 Diagnosis | Malignant neoplasm of lower-inner quadrant of unspecified female breast | Neoplasm |
| C50411 | ICD-10 Diagnosis | Malignant neoplasm of upper-outer quadrant of right female breast       | Neoplasm |
| C50412 | ICD-10 Diagnosis | Malignant neoplasm of upper-outer quadrant of left female breast        | Neoplasm |
| C50419 | ICD-10 Diagnosis | Malignant neoplasm of upper-outer quadrant of unspecified female breast | Neoplasm |
| C50511 | ICD-10 Diagnosis | Malignant neoplasm of lower-outer quadrant of right female breast       | Neoplasm |
| C50512 | ICD-10 Diagnosis | Malignant neoplasm of lower-outer quadrant of left female breast        | Neoplasm |
| C50519 | ICD-10 Diagnosis | Malignant neoplasm of lower-outer quadrant of unspecified female breast | Neoplasm |
| C50521 | ICD-10 Diagnosis | Malignant neoplasm of lower-outer quadrant of right male breast         | Neoplasm |
| C50611 | ICD-10 Diagnosis | Malignant neoplasm of axillary tail of right female breast              | Neoplasm |
| C50612 | ICD-10 Diagnosis | Malignant neoplasm of axillary tail of left female breast               | Neoplasm |
| C50619 | ICD-10 Diagnosis | Malignant neoplasm of axillary tail of unspecified female breast        | Neoplasm |
| C50811 | ICD-10 Diagnosis | Malignant neoplasm of overlapping sites of right female breast          | Neoplasm |
| C50812 | ICD-10 Diagnosis | Malignant neoplasm of overlapping sites of left female breast           | Neoplasm |
| C50819 | ICD-10 Diagnosis | Malignant neoplasm of overlapping sites of unspecified female breast    | Neoplasm |
| C50911 | ICD-10 Diagnosis | Malignant neoplasm of unspecified site of right female breast           | Neoplasm |
| C50912 | ICD-10 Diagnosis | Malignant neoplasm of unspecified site of left female breast            | Neoplasm |
| C50919 | ICD-10 Diagnosis | Malignant neoplasm of unspecified site of unspecified female breast     | Neoplasm |
| C50921 | ICD-10 Diagnosis | Malignant neoplasm of unspecified site of right male breast             | Neoplasm |

|        |                  |                                                                   |          |
|--------|------------------|-------------------------------------------------------------------|----------|
| C50922 | ICD-10 Diagnosis | Malignant neoplasm of unspecified site of left male breast        | Neoplasm |
| C50929 | ICD-10 Diagnosis | Malignant neoplasm of unspecified site of unspecified male breast | Neoplasm |
| C510   | ICD-10 Diagnosis | Malignant neoplasm of labium majus                                | Neoplasm |
| C518   | ICD-10 Diagnosis | Malignant neoplasm of overlapping sites of vulva                  | Neoplasm |
| C519   | ICD-10 Diagnosis | Malignant neoplasm of vulva, unspecified                          | Neoplasm |
| C52    | ICD-10 Diagnosis | Malignant neoplasm of vagina                                      | Neoplasm |
| C530   | ICD-10 Diagnosis | Malignant neoplasm of endocervix                                  | Neoplasm |
| C538   | ICD-10 Diagnosis | Malignant neoplasm of overlapping sites of cervix uteri           | Neoplasm |
| C539   | ICD-10 Diagnosis | Malignant neoplasm of cervix uteri, unspecified                   | Neoplasm |
| C541   | ICD-10 Diagnosis | Malignant neoplasm of endometrium                                 | Neoplasm |
| C542   | ICD-10 Diagnosis | Malignant neoplasm of myometrium                                  | Neoplasm |
| C548   | ICD-10 Diagnosis | Malignant neoplasm of overlapping sites of corpus uteri           | Neoplasm |
| C549   | ICD-10 Diagnosis | Malignant neoplasm of corpus uteri, unspecified                   | Neoplasm |
| C55    | ICD-10 Diagnosis | Malignant neoplasm of uterus, part unspecified                    | Neoplasm |
| C561   | ICD-10 Diagnosis | Malignant neoplasm of right ovary                                 | Neoplasm |
| C562   | ICD-10 Diagnosis | Malignant neoplasm of left ovary                                  | Neoplasm |
| C569   | ICD-10 Diagnosis | Malignant neoplasm of unspecified ovary                           | Neoplasm |
| C5700  | ICD-10 Diagnosis | Malignant neoplasm of unspecified fallopian tube                  | Neoplasm |
| C5701  | ICD-10 Diagnosis | Malignant neoplasm of right fallopian tube                        | Neoplasm |
| C5702  | ICD-10 Diagnosis | Malignant neoplasm of left fallopian tube                         | Neoplasm |
| C574   | ICD-10 Diagnosis | Malignant neoplasm of uterine adnexa, unspecified                 | Neoplasm |
| C578   | ICD-10 Diagnosis | Malignant neoplasm of overlapping sites of female genital organs  | Neoplasm |
| C579   | ICD-10 Diagnosis | Malignant neoplasm of female genital organ, unspecified           | Neoplasm |
| C601   | ICD-10 Diagnosis | Malignant neoplasm of glans penis                                 | Neoplasm |
| C608   | ICD-10 Diagnosis | Malignant neoplasm of overlapping sites of penis                  | Neoplasm |
| C609   | ICD-10 Diagnosis | Malignant neoplasm of penis, unspecified                          | Neoplasm |

|       |                  |                                                                                        |          |
|-------|------------------|----------------------------------------------------------------------------------------|----------|
| C61   | ICD-10 Diagnosis | Malignant neoplasm of prostate                                                         | Neoplasm |
| C6200 | ICD-10 Diagnosis | Malignant neoplasm of unspecified undescended testis                                   | Neoplasm |
| C6202 | ICD-10 Diagnosis | Malignant neoplasm of unspecified undescended left testis                              | Neoplasm |
| C6210 | ICD-10 Diagnosis | Malignant neoplasm of unspecified descended testis                                     | Neoplasm |
| C6211 | ICD-10 Diagnosis | Malignant neoplasm of descended right testis                                           | Neoplasm |
| C6212 | ICD-10 Diagnosis | Malignant neoplasm of descended left testis                                            | Neoplasm |
| C6290 | ICD-10 Diagnosis | Malignant neoplasm of unspecified testis, unspecified whether descended or undescended | Neoplasm |
| C6291 | ICD-10 Diagnosis | Malignant neoplasm of right testis, unspecified whether descended or undescended       | Neoplasm |
| C6292 | ICD-10 Diagnosis | Malignant neoplasm of left testis, unspecified whether descended or undescended        | Neoplasm |
| C638  | ICD-10 Diagnosis | Malignant neoplasm of overlapping sites of male genital organs                         | Neoplasm |
| C639  | ICD-10 Diagnosis | Malignant neoplasm of male genital organ, unspecified                                  | Neoplasm |
| C641  | ICD-10 Diagnosis | Malignant neoplasm of right kidney, except renal pelvis                                | Neoplasm |
| C642  | ICD-10 Diagnosis | Malignant neoplasm of left kidney, except renal pelvis                                 | Neoplasm |
| C649  | ICD-10 Diagnosis | Malignant neoplasm of unspecified kidney, except renal pelvis                          | Neoplasm |
| C651  | ICD-10 Diagnosis | Malignant neoplasm of right renal pelvis                                               | Neoplasm |
| C652  | ICD-10 Diagnosis | Malignant neoplasm of left renal pelvis                                                | Neoplasm |
| C659  | ICD-10 Diagnosis | Malignant neoplasm of unspecified renal pelvis                                         | Neoplasm |
| C661  | ICD-10 Diagnosis | Malignant neoplasm of right ureter                                                     | Neoplasm |
| C662  | ICD-10 Diagnosis | Malignant neoplasm of left ureter                                                      | Neoplasm |
| C669  | ICD-10 Diagnosis | Malignant neoplasm of unspecified ureter                                               | Neoplasm |
| C670  | ICD-10 Diagnosis | Malignant neoplasm of trigone of bladder                                               | Neoplasm |
| C671  | ICD-10 Diagnosis | Malignant neoplasm of dome of bladder                                                  | Neoplasm |
| C672  | ICD-10 Diagnosis | Malignant neoplasm of lateral wall of bladder                                          | Neoplasm |



|       |                  |                                                             |          |
|-------|------------------|-------------------------------------------------------------|----------|
| C673  | ICD-10 Diagnosis | Malignant neoplasm of anterior wall of bladder              | Neoplasm |
| C674  | ICD-10 Diagnosis | Malignant neoplasm of posterior wall of bladder             | Neoplasm |
| C675  | ICD-10 Diagnosis | Malignant neoplasm of bladder neck                          | Neoplasm |
| C676  | ICD-10 Diagnosis | Malignant neoplasm of ureteric orifice                      | Neoplasm |
| C678  | ICD-10 Diagnosis | Malignant neoplasm of overlapping sites of bladder          | Neoplasm |
| C679  | ICD-10 Diagnosis | Malignant neoplasm of bladder, unspecified                  | Neoplasm |
| C680  | ICD-10 Diagnosis | Malignant neoplasm of urethra                               | Neoplasm |
| C688  | ICD-10 Diagnosis | Malignant neoplasm of overlapping sites of urinary organs   | Neoplasm |
| C689  | ICD-10 Diagnosis | Malignant neoplasm of urinary organ, unspecified            | Neoplasm |
| C6901 | ICD-10 Diagnosis | Malignant neoplasm of right conjunctiva                     | Neoplasm |
| C6902 | ICD-10 Diagnosis | Malignant neoplasm of left conjunctiva                      | Neoplasm |
| C6930 | ICD-10 Diagnosis | Malignant neoplasm of unspecified choroid                   | Neoplasm |
| C6931 | ICD-10 Diagnosis | Malignant neoplasm of right choroid                         | Neoplasm |
| C6932 | ICD-10 Diagnosis | Malignant neoplasm of left choroid                          | Neoplasm |
| C6952 | ICD-10 Diagnosis | Malignant neoplasm of left lacrimal gland and duct          | Neoplasm |
| C6990 | ICD-10 Diagnosis | Malignant neoplasm of unspecified site of unspecified eye   | Neoplasm |
| C700  | ICD-10 Diagnosis | Malignant neoplasm of cerebral meninges                     | Neoplasm |
| C701  | ICD-10 Diagnosis | Malignant neoplasm of spinal meninges                       | Neoplasm |
| C709  | ICD-10 Diagnosis | Malignant neoplasm of meninges, unspecified                 | Neoplasm |
| C710  | ICD-10 Diagnosis | Malignant neoplasm of cerebrum, except lobes and ventricles | Neoplasm |
| C711  | ICD-10 Diagnosis | Malignant neoplasm of frontal lobe                          | Neoplasm |
| C712  | ICD-10 Diagnosis | Malignant neoplasm of temporal lobe                         | Neoplasm |
| C713  | ICD-10 Diagnosis | Malignant neoplasm of parietal lobe                         | Neoplasm |
| C714  | ICD-10 Diagnosis | Malignant neoplasm of occipital lobe                        | Neoplasm |
| C715  | ICD-10 Diagnosis | Malignant neoplasm of cerebral ventricle                    | Neoplasm |
| C716  | ICD-10 Diagnosis | Malignant neoplasm of cerebellum                            | Neoplasm |
| C717  | ICD-10 Diagnosis | Malignant neoplasm of brain stem                            | Neoplasm |

|       |                  |                                                                        |          |
|-------|------------------|------------------------------------------------------------------------|----------|
| C718  | ICD-10 Diagnosis | Malignant neoplasm of overlapping sites<br>of brain                    | Neoplasm |
| C719  | ICD-10 Diagnosis | Malignant neoplasm of brain, unspecified                               | Neoplasm |
| C720  | ICD-10 Diagnosis | Malignant neoplasm of spinal cord                                      | Neoplasm |
| C721  | ICD-10 Diagnosis | Malignant neoplasm of cauda equina                                     | Neoplasm |
| C7231 | ICD-10 Diagnosis | Malignant neoplasm of right optic nerve                                | Neoplasm |
| C7232 | ICD-10 Diagnosis | Malignant neoplasm of left optic nerve                                 | Neoplasm |
| C7241 | ICD-10 Diagnosis | Malignant neoplasm of right acoustic<br>nerve                          | Neoplasm |
| C7250 | ICD-10 Diagnosis | Malignant neoplasm of unspecified<br>cranial nerve                     | Neoplasm |
| C7259 | ICD-10 Diagnosis | Malignant neoplasm of other cranial<br>nerves                          | Neoplasm |
| C729  | ICD-10 Diagnosis | Malignant neoplasm of central nervous<br>system, unspecified           | Neoplasm |
| C73   | ICD-10 Diagnosis | Malignant neoplasm of thyroid gland                                    | Neoplasm |
| C7400 | ICD-10 Diagnosis | Malignant neoplasm of cortex of<br>unspecified adrenal gland           | Neoplasm |
| C7402 | ICD-10 Diagnosis | Malignant neoplasm of cortex of left<br>adrenal gland                  | Neoplasm |
| C7410 | ICD-10 Diagnosis | Malignant neoplasm of medulla of<br>unspecified adrenal gland          | Neoplasm |
| C7411 | ICD-10 Diagnosis | Malignant neoplasm of medulla of right<br>adrenal gland                | Neoplasm |
| C7412 | ICD-10 Diagnosis | Malignant neoplasm of medulla of left<br>adrenal gland                 | Neoplasm |
| C7490 | ICD-10 Diagnosis | Malignant neoplasm of unspecified part<br>of unspecified adrenal gland | Neoplasm |
| C7491 | ICD-10 Diagnosis | Malignant neoplasm of unspecified part<br>of right adrenal gland       | Neoplasm |
| C7492 | ICD-10 Diagnosis | Malignant neoplasm of unspecified part<br>of left adrenal gland        | Neoplasm |
| C750  | ICD-10 Diagnosis | Malignant neoplasm of parathyroid gland                                | Neoplasm |
| C751  | ICD-10 Diagnosis | Malignant neoplasm of pituitary gland                                  | Neoplasm |
| C753  | ICD-10 Diagnosis | Malignant neoplasm of pineal gland                                     | Neoplasm |
| C754  | ICD-10 Diagnosis | Malignant neoplasm of carotid body                                     | Neoplasm |
| C759  | ICD-10 Diagnosis | Malignant neoplasm of endocrine gland,<br>unspecified                  | Neoplasm |
| C760  | ICD-10 Diagnosis | Malignant neoplasm of head, face and<br>neck                           | Neoplasm |

|       |                  |                                                                                   |          |
|-------|------------------|-----------------------------------------------------------------------------------|----------|
| C761  | ICD-10 Diagnosis | Malignant neoplasm of thorax                                                      | Neoplasm |
| C762  | ICD-10 Diagnosis | Malignant neoplasm of abdomen                                                     | Neoplasm |
| C763  | ICD-10 Diagnosis | Malignant neoplasm of pelvis                                                      | Neoplasm |
| C7640 | ICD-10 Diagnosis | Malignant neoplasm of unspecified upper limb                                      | Neoplasm |
| C7641 | ICD-10 Diagnosis | Malignant neoplasm of right upper limb                                            | Neoplasm |
| C7642 | ICD-10 Diagnosis | Malignant neoplasm of left upper limb                                             | Neoplasm |
| C7651 | ICD-10 Diagnosis | Malignant neoplasm of right lower limb                                            | Neoplasm |
| C7652 | ICD-10 Diagnosis | Malignant neoplasm of left lower limb                                             | Neoplasm |
| C768  | ICD-10 Diagnosis | Malignant neoplasm of other specified ill-defined sites                           | Neoplasm |
| C8100 | ICD-10 Diagnosis | Nodular lymphocyte predominant Hodgkin lymphoma, unspecified site                 | Neoplasm |
| C8111 | ICD-10 Diagnosis | Nodular sclerosis classical Hodgkin lymphoma, lymph nodes of head, face, and neck | Neoplasm |
| C8112 | ICD-10 Diagnosis | Nodular sclerosis classical Hodgkin lymphoma, intrathoracic lymph nodes           | Neoplasm |
| C8140 | ICD-10 Diagnosis | Lymphocyte-rich classical Hodgkin lymphoma, unspecified site                      | Neoplasm |
| C8190 | ICD-10 Diagnosis | Hodgkin lymphoma, unspecified, unspecified site                                   | Neoplasm |
| C8191 | ICD-10 Diagnosis | Hodgkin lymphoma, unspecified, lymph nodes of head, face, and neck                | Neoplasm |
| C8200 | ICD-10 Diagnosis | Follicular lymphoma grade I, unspecified site                                     | Neoplasm |
| C8201 | ICD-10 Diagnosis | Follicular lymphoma grade I, lymph nodes of head, face, and neck                  | Neoplasm |
| C8202 | ICD-10 Diagnosis | Follicular lymphoma grade I, intrathoracic lymph nodes                            | Neoplasm |
| C8203 | ICD-10 Diagnosis | Follicular lymphoma grade I, intra-abdominal lymph nodes                          | Neoplasm |
| C8204 | ICD-10 Diagnosis | Follicular lymphoma grade I, lymph nodes of axilla and upper limb                 | Neoplasm |
| C8205 | ICD-10 Diagnosis | Follicular lymphoma grade I, lymph nodes of inguinal region and lower limb        | Neoplasm |
| C8208 | ICD-10 Diagnosis | Follicular lymphoma grade I, lymph nodes of multiple sites                        | Neoplasm |

|       |                  |                                                                                 |          |
|-------|------------------|---------------------------------------------------------------------------------|----------|
| C8209 | ICD-10 Diagnosis | Follicular lymphoma grade I, extranodal and solid organ sites                   | Neoplasm |
| C8210 | ICD-10 Diagnosis | Follicular lymphoma grade II, unspecified site                                  | Neoplasm |
| C8213 | ICD-10 Diagnosis | Follicular lymphoma grade II, intra-abdominal lymph nodes                       | Neoplasm |
| C8215 | ICD-10 Diagnosis | Follicular lymphoma grade II, lymph nodes of inguinal region and lower limb     | Neoplasm |
| C8218 | ICD-10 Diagnosis | Follicular lymphoma grade II, lymph nodes of multiple sites                     | Neoplasm |
| C8220 | ICD-10 Diagnosis | Follicular lymphoma grade III, unspecified, unspecified site                    | Neoplasm |
| C8221 | ICD-10 Diagnosis | Follicular lymphoma grade III, unspecified, lymph nodes of head, face, and neck | Neoplasm |
| C8228 | ICD-10 Diagnosis | Follicular lymphoma grade III, unspecified, lymph nodes of multiple sites       | Neoplasm |
| C8230 | ICD-10 Diagnosis | Follicular lymphoma grade IIIa, unspecified site                                | Neoplasm |
| C8234 | ICD-10 Diagnosis | Follicular lymphoma grade IIIa, lymph nodes of axilla and upper limb            | Neoplasm |
| C8235 | ICD-10 Diagnosis | Follicular lymphoma grade IIIa, lymph nodes of inguinal region and lower limb   | Neoplasm |
| C8238 | ICD-10 Diagnosis | Follicular lymphoma grade IIIa, lymph nodes of multiple sites                   | Neoplasm |
| C8251 | ICD-10 Diagnosis | Diffuse follicle center lymphoma, lymph nodes of head, face, and neck           | Neoplasm |
| C8280 | ICD-10 Diagnosis | Other types of follicular lymphoma, unspecified site                            | Neoplasm |
| C8281 | ICD-10 Diagnosis | Other types of follicular lymphoma, lymph nodes of head, face, and neck         | Neoplasm |
| C8288 | ICD-10 Diagnosis | Other types of follicular lymphoma, lymph nodes of multiple sites               | Neoplasm |
| C8290 | ICD-10 Diagnosis | Follicular lymphoma, unspecified, unspecified site                              | Neoplasm |
| C8291 | ICD-10 Diagnosis | Follicular lymphoma, unspecified, lymph nodes of head, face, and neck           | Neoplasm |
| C8292 | ICD-10 Diagnosis | Follicular lymphoma, unspecified, intrathoracic lymph nodes                     | Neoplasm |

|       |                  |                                                                                 |          |
|-------|------------------|---------------------------------------------------------------------------------|----------|
| C8294 | ICD-10 Diagnosis | Follicular lymphoma, unspecified, lymph nodes of axilla and upper limb          | Neoplasm |
| C8295 | ICD-10 Diagnosis | Follicular lymphoma, unspecified, lymph nodes of inguinal region and lower limb | Neoplasm |
| C8298 | ICD-10 Diagnosis | Follicular lymphoma, unspecified, lymph nodes of multiple sites                 | Neoplasm |
| C8299 | ICD-10 Diagnosis | Follicular lymphoma, unspecified, extranodal and solid organ sites              | Neoplasm |
| C8300 | ICD-10 Diagnosis | Small cell B-cell lymphoma, unspecified site                                    | Neoplasm |
| C8304 | ICD-10 Diagnosis | Small cell B-cell lymphoma, lymph nodes of axilla and upper limb                | Neoplasm |
| C8305 | ICD-10 Diagnosis | Small cell B-cell lymphoma, lymph nodes of inguinal region and lower limb       | Neoplasm |
| C8306 | ICD-10 Diagnosis | Small cell B-cell lymphoma, intrapelvic lymph nodes                             | Neoplasm |
| C8307 | ICD-10 Diagnosis | Small cell B-cell lymphoma, spleen                                              | Neoplasm |
| C8308 | ICD-10 Diagnosis | Small cell B-cell lymphoma, lymph nodes of multiple sites                       | Neoplasm |
| C8309 | ICD-10 Diagnosis | Small cell B-cell lymphoma, extranodal and solid organ sites                    | Neoplasm |
| C8310 | ICD-10 Diagnosis | Mantle cell lymphoma, unspecified site                                          | Neoplasm |
| C8313 | ICD-10 Diagnosis | Mantle cell lymphoma, intra-abdominal lymph nodes                               | Neoplasm |
| C8314 | ICD-10 Diagnosis | Mantle cell lymphoma, lymph nodes of axilla and upper limb                      | Neoplasm |
| C8315 | ICD-10 Diagnosis | Mantle cell lymphoma, lymph nodes of inguinal region and lower limb             | Neoplasm |
| C8318 | ICD-10 Diagnosis | Mantle cell lymphoma, lymph nodes of multiple sites                             | Neoplasm |
| C8319 | ICD-10 Diagnosis | Mantle cell lymphoma, extranodal and solid organ sites                          | Neoplasm |
| C8330 | ICD-10 Diagnosis | Diffuse large B-cell lymphoma, unspecified site                                 | Neoplasm |
| C8331 | ICD-10 Diagnosis | Diffuse large B-cell lymphoma, lymph nodes of head, face, and neck              | Neoplasm |
| C8332 | ICD-10 Diagnosis | Diffuse large B-cell lymphoma, intrathoracic lymph nodes                        | Neoplasm |
| C8333 | ICD-10 Diagnosis | Diffuse large B-cell lymphoma, intra-abdominal lymph nodes                      | Neoplasm |

|       |                  |                                                                               |          |
|-------|------------------|-------------------------------------------------------------------------------|----------|
| C8334 | ICD-10 Diagnosis | Diffuse large B-cell lymphoma, lymph nodes of axilla and upper limb           | Neoplasm |
| C8335 | ICD-10 Diagnosis | Diffuse large B-cell lymphoma, lymph nodes of inguinal region and lower limb  | Neoplasm |
| C8336 | ICD-10 Diagnosis | Diffuse large B-cell lymphoma, intrapelvic lymph nodes                        | Neoplasm |
| C8338 | ICD-10 Diagnosis | Diffuse large B-cell lymphoma, lymph nodes of multiple sites                  | Neoplasm |
| C8339 | ICD-10 Diagnosis | Diffuse large B-cell lymphoma, extranodal and solid organ sites               | Neoplasm |
| C8350 | ICD-10 Diagnosis | Lymphoblastic (diffuse) lymphoma, unspecified site                            | Neoplasm |
| C8351 | ICD-10 Diagnosis | Lymphoblastic (diffuse) lymphoma, lymph nodes of head, face, and neck         | Neoplasm |
| C8370 | ICD-10 Diagnosis | Burkitt lymphoma, unspecified site                                            | Neoplasm |
| C8374 | ICD-10 Diagnosis | Burkitt lymphoma, lymph nodes of axilla and upper limb                        | Neoplasm |
| C8376 | ICD-10 Diagnosis | Burkitt lymphoma, intrapelvic lymph nodes                                     | Neoplasm |
| C8379 | ICD-10 Diagnosis | Burkitt lymphoma, extranodal and solid organ sites                            | Neoplasm |
| C8380 | ICD-10 Diagnosis | Other non-follicular lymphoma, unspecified site                               | Neoplasm |
| C8381 | ICD-10 Diagnosis | Other non-follicular lymphoma, lymph nodes of head, face, and neck            | Neoplasm |
| C8389 | ICD-10 Diagnosis | Other non-follicular lymphoma, extranodal and solid organ sites               | Neoplasm |
| C8390 | ICD-10 Diagnosis | Non-follicular (diffuse) lymphoma, unspecified, unspecified site              | Neoplasm |
| C8398 | ICD-10 Diagnosis | Non-follicular (diffuse) lymphoma, unspecified, lymph nodes of multiple sites | Neoplasm |
| C8400 | ICD-10 Diagnosis | Mycosis fungoides, unspecified site                                           | Neoplasm |
| C8405 | ICD-10 Diagnosis | Mycosis fungoides, lymph nodes of inguinal region and lower limb              | Neoplasm |
| C8409 | ICD-10 Diagnosis | Mycosis fungoides, extranodal and solid organ sites                           | Neoplasm |
| C8410 | ICD-10 Diagnosis | Sezary disease, unspecified site                                              | Neoplasm |
| C8419 | ICD-10 Diagnosis | Sezary disease, extranodal and solid organ sites                              | Neoplasm |
| C8440 | ICD-10 Diagnosis | Peripheral T-cell lymphoma, not classified, unspecified site                  | Neoplasm |

|       |                  |                                                                                    |          |
|-------|------------------|------------------------------------------------------------------------------------|----------|
| C8441 | ICD-10 Diagnosis | Peripheral T-cell lymphoma, not classified, lymph nodes of head, face, and neck    | Neoplasm |
| C8444 | ICD-10 Diagnosis | Peripheral T-cell lymphoma, not classified, lymph nodes of axilla and upper limb   | Neoplasm |
| C8448 | ICD-10 Diagnosis | Peripheral T-cell lymphoma, not classified, lymph nodes of multiple sites          | Neoplasm |
| C8449 | ICD-10 Diagnosis | Peripheral T-cell lymphoma, not classified, extranodal and solid organ sites       | Neoplasm |
| C8470 | ICD-10 Diagnosis | Anaplastic large cell lymphoma, ALK-negative, unspecified site                     | Neoplasm |
| C8474 | ICD-10 Diagnosis | Anaplastic large cell lymphoma, ALK-negative, lymph nodes of axilla and upper limb | Neoplasm |
| C8478 | ICD-10 Diagnosis | Anaplastic large cell lymphoma, ALK-negative, lymph nodes of multiple sites        | Neoplasm |
| C84A0 | ICD-10 Diagnosis | Cutaneous T-cell lymphoma, unspecified, unspecified site                           | Neoplasm |
| C84A9 | ICD-10 Diagnosis | Cutaneous T-cell lymphoma, unspecified, extranodal and solid organ sites           | Neoplasm |
| C8510 | ICD-10 Diagnosis | Unspecified B-cell lymphoma, unspecified site                                      | Neoplasm |
| C8511 | ICD-10 Diagnosis | Unspecified B-cell lymphoma, lymph nodes of head, face, and neck                   | Neoplasm |
| C8512 | ICD-10 Diagnosis | Unspecified B-cell lymphoma, intrathoracic lymph nodes                             | Neoplasm |
| C8513 | ICD-10 Diagnosis | Unspecified B-cell lymphoma, intra-abdominal lymph nodes                           | Neoplasm |
| C8514 | ICD-10 Diagnosis | Unspecified B-cell lymphoma, lymph nodes of axilla and upper limb                  | Neoplasm |
| C8515 | ICD-10 Diagnosis | Unspecified B-cell lymphoma, lymph nodes of inguinal region and lower limb         | Neoplasm |
| C8516 | ICD-10 Diagnosis | Unspecified B-cell lymphoma, intrapelvic lymph nodes                               | Neoplasm |
| C8518 | ICD-10 Diagnosis | Unspecified B-cell lymphoma, lymph nodes of multiple sites                         | Neoplasm |
| C8519 | ICD-10 Diagnosis | Unspecified B-cell lymphoma, extranodal and solid organ sites                      | Neoplasm |

|       |                  |                                                                                              |          |
|-------|------------------|----------------------------------------------------------------------------------------------|----------|
| C8520 | ICD-10 Diagnosis | Mediastinal (thymic) large B-cell lymphoma, unspecified site                                 | Neoplasm |
| C8580 | ICD-10 Diagnosis | Other specified types of non-Hodgkin lymphoma, unspecified site                              | Neoplasm |
| C8581 | ICD-10 Diagnosis | Other specified types of non-Hodgkin lymphoma, lymph nodes of head, face, and neck           | Neoplasm |
| C8583 | ICD-10 Diagnosis | Other specified types of non-Hodgkin lymphoma, intra-abdominal lymph nodes                   | Neoplasm |
| C8584 | ICD-10 Diagnosis | Other specified types of non-Hodgkin lymphoma, lymph nodes of axilla and upper limb          | Neoplasm |
| C8585 | ICD-10 Diagnosis | Other specified types of non-Hodgkin lymphoma, lymph nodes of inguinal region and lower limb | Neoplasm |
| C8587 | ICD-10 Diagnosis | Other specified types of non-Hodgkin lymphoma, spleen                                        | Neoplasm |
| C8588 | ICD-10 Diagnosis | Other specified types of non-Hodgkin lymphoma, lymph nodes of multiple sites                 | Neoplasm |
| C8589 | ICD-10 Diagnosis | Other specified types of non-Hodgkin lymphoma, extranodal and solid organ sites              | Neoplasm |
| C8590 | ICD-10 Diagnosis | Non-Hodgkin lymphoma, unspecified, unspecified site                                          | Neoplasm |
| C8591 | ICD-10 Diagnosis | Non-Hodgkin lymphoma, unspecified, lymph nodes of head, face, and neck                       | Neoplasm |
| C8593 | ICD-10 Diagnosis | Non-Hodgkin lymphoma, unspecified, intra-abdominal lymph nodes                               | Neoplasm |
| C8594 | ICD-10 Diagnosis | Non-Hodgkin lymphoma, unspecified, lymph nodes of axilla and upper limb                      | Neoplasm |
| C8595 | ICD-10 Diagnosis | Non-Hodgkin lymphoma, unspecified, lymph nodes of inguinal region and lower limb             | Neoplasm |
| C8596 | ICD-10 Diagnosis | Non-Hodgkin lymphoma, unspecified, intrapelvic lymph nodes                                   | Neoplasm |
| C8597 | ICD-10 Diagnosis | Non-Hodgkin lymphoma, unspecified, spleen                                                    | Neoplasm |
| C8598 | ICD-10 Diagnosis | Non-Hodgkin lymphoma, unspecified, lymph nodes of multiple sites                             | Neoplasm |



|       |                  |                                                                                               |          |
|-------|------------------|-----------------------------------------------------------------------------------------------|----------|
| C8599 | ICD-10 Diagnosis | Non-Hodgkin lymphoma, unspecified, extranodal and solid organ sites                           | Neoplasm |
| C880  | ICD-10 Diagnosis | Waldenstrom macroglobulinemia                                                                 | Neoplasm |
| C882  | ICD-10 Diagnosis | Heavy chain disease                                                                           | Neoplasm |
| C884  | ICD-10 Diagnosis | Extranodal marginal zone B-cell lymphoma of mucosa-associated lymphoid tissue [MALT-lymphoma] | Neoplasm |
| C888  | ICD-10 Diagnosis | Other malignant immunoproliferative diseases                                                  | Neoplasm |
| C9000 | ICD-10 Diagnosis | Multiple myeloma not having achieved remission                                                | Neoplasm |
| C9001 | ICD-10 Diagnosis | Multiple myeloma in remission                                                                 | Neoplasm |
| C9002 | ICD-10 Diagnosis | Multiple myeloma in relapse                                                                   | Neoplasm |
| C9010 | ICD-10 Diagnosis | Plasma cell leukemia not having achieved remission                                            | Neoplasm |
| C9011 | ICD-10 Diagnosis | Plasma cell leukemia in remission                                                             | Neoplasm |
| C9012 | ICD-10 Diagnosis | Plasma cell leukemia in relapse                                                               | Neoplasm |
| C9020 | ICD-10 Diagnosis | Extramedullary plasmacytoma not having achieved remission                                     | Neoplasm |
| C9030 | ICD-10 Diagnosis | Solitary plasmacytoma not having achieved remission                                           | Neoplasm |
| C9032 | ICD-10 Diagnosis | Solitary plasmacytoma in relapse                                                              | Neoplasm |
| C9100 | ICD-10 Diagnosis | Acute lymphoblastic leukemia not having achieved remission                                    | Neoplasm |
| C9101 | ICD-10 Diagnosis | Acute lymphoblastic leukemia, in remission                                                    | Neoplasm |
| C9102 | ICD-10 Diagnosis | Acute lymphoblastic leukemia, in relapse                                                      | Neoplasm |
| C9110 | ICD-10 Diagnosis | Chronic lymphocytic leukemia of B-cell type not having achieved remission                     | Neoplasm |
| C9111 | ICD-10 Diagnosis | Chronic lymphocytic leukemia of B-cell type in remission                                      | Neoplasm |
| C9112 | ICD-10 Diagnosis | Chronic lymphocytic leukemia of B-cell type in relapse                                        | Neoplasm |
| C9140 | ICD-10 Diagnosis | Hairy cell leukemia not having achieved remission                                             | Neoplasm |
| C9141 | ICD-10 Diagnosis | Hairy cell leukemia, in remission                                                             | Neoplasm |
| C9151 | ICD-10 Diagnosis | Adult T-cell lymphoma/leukemia (HTLV-1-associated), in remission                              | Neoplasm |
| C9190 | ICD-10 Diagnosis | Lymphoid leukemia, unspecified not having achieved remission                                  | Neoplasm |
| C9191 | ICD-10 Diagnosis | Lymphoid leukemia, unspecified, in remission                                                  | Neoplasm |
| C9192 | ICD-10 Diagnosis | Lymphoid leukemia, unspecified, in relapse                                                    | Neoplasm |

|       |                  |                                                                                    |          |
|-------|------------------|------------------------------------------------------------------------------------|----------|
| C91Z0 | ICD-10 Diagnosis | Other lymphoid leukemia not having achieved remission                              | Neoplasm |
| C91Z1 | ICD-10 Diagnosis | Other lymphoid leukemia, in remission                                              | Neoplasm |
| C9200 | ICD-10 Diagnosis | Acute myeloblastic leukemia, not having achieved remission                         | Neoplasm |
| C9201 | ICD-10 Diagnosis | Acute myeloblastic leukemia, in remission                                          | Neoplasm |
| C9202 | ICD-10 Diagnosis | Acute myeloblastic leukemia, in relapse                                            | Neoplasm |
| C9210 | ICD-10 Diagnosis | Chronic myeloid leukemia, BCR/ABL-positive, not having achieved remission          | Neoplasm |
| C9211 | ICD-10 Diagnosis | Chronic myeloid leukemia, BCR/ABL-positive, in remission                           | Neoplasm |
| C9220 | ICD-10 Diagnosis | Atypical chronic myeloid leukemia, BCR/ABL-negative, not having achieved remission | Neoplasm |
| C9230 | ICD-10 Diagnosis | Myeloid sarcoma, not having achieved remission                                     | Neoplasm |
| C9231 | ICD-10 Diagnosis | Myeloid sarcoma, in remission                                                      | Neoplasm |
| C9232 | ICD-10 Diagnosis | Myeloid sarcoma, in relapse                                                        | Neoplasm |
| C9240 | ICD-10 Diagnosis | Acute promyelocytic leukemia, not having achieved remission                        | Neoplasm |
| C9241 | ICD-10 Diagnosis | Acute promyelocytic leukemia, in remission                                         | Neoplasm |
| C9250 | ICD-10 Diagnosis | Acute myelomonocytic leukemia, not having achieved remission                       | Neoplasm |
| C9251 | ICD-10 Diagnosis | Acute myelomonocytic leukemia, in remission                                        | Neoplasm |
| C9290 | ICD-10 Diagnosis | Myeloid leukemia, unspecified, not having achieved remission                       | Neoplasm |
| C9291 | ICD-10 Diagnosis | Myeloid leukemia, unspecified in remission                                         | Neoplasm |
| C9292 | ICD-10 Diagnosis | Myeloid leukemia, unspecified in relapse                                           | Neoplasm |
| C92A0 | ICD-10 Diagnosis | Acute myeloid leukemia with multilineage dysplasia, not having achieved remission  | Neoplasm |
| C92A1 | ICD-10 Diagnosis | Acute myeloid leukemia with multilineage dysplasia, in remission                   | Neoplasm |
| C92Z0 | ICD-10 Diagnosis | Other myeloid leukemia not having achieved remission                               | Neoplasm |
| C92Z1 | ICD-10 Diagnosis | Other myeloid leukemia, in remission                                               | Neoplasm |

|       |                  |                                                                               |          |
|-------|------------------|-------------------------------------------------------------------------------|----------|
| C9300 | ICD-10 Diagnosis | Acute monoblastic/monocytic leukemia, not having achieved remission           | Neoplasm |
| C9301 | ICD-10 Diagnosis | Acute monoblastic/monocytic leukemia, in remission                            | Neoplasm |
| C9310 | ICD-10 Diagnosis | Chronic myelomonocytic leukemia not having achieved remission                 | Neoplasm |
| C9311 | ICD-10 Diagnosis | Chronic myelomonocytic leukemia, in remission                                 | Neoplasm |
| C9330 | ICD-10 Diagnosis | Juvenile myelomonocytic leukemia, not having achieved remission               | Neoplasm |
| C9390 | ICD-10 Diagnosis | Monocytic leukemia, unspecified, not having achieved remission                | Neoplasm |
| C9400 | ICD-10 Diagnosis | Acute erythroid leukemia, not having achieved remission                       | Neoplasm |
| C9421 | ICD-10 Diagnosis | Acute megakaryoblastic leukemia, in remission                                 | Neoplasm |
| C946  | ICD-10 Diagnosis | Myelodysplastic disease, not classified                                       | Neoplasm |
| C9480 | ICD-10 Diagnosis | Other specified leukemias not having achieved remission                       | Neoplasm |
| C9500 | ICD-10 Diagnosis | Acute leukemia of unspecified cell type not having achieved remission         | Neoplasm |
| C9501 | ICD-10 Diagnosis | Acute leukemia of unspecified cell type, in remission                         | Neoplasm |
| C9502 | ICD-10 Diagnosis | Acute leukemia of unspecified cell type, in relapse                           | Neoplasm |
| C9510 | ICD-10 Diagnosis | Chronic leukemia of unspecified cell type not having achieved remission       | Neoplasm |
| C9511 | ICD-10 Diagnosis | Chronic leukemia of unspecified cell type, in remission                       | Neoplasm |
| C9512 | ICD-10 Diagnosis | Chronic leukemia of unspecified cell type, in relapse                         | Neoplasm |
| C9590 | ICD-10 Diagnosis | Leukemia, unspecified not having achieved remission                           | Neoplasm |
| C9591 | ICD-10 Diagnosis | Leukemia, unspecified, in remission                                           | Neoplasm |
| C962  | ICD-10 Diagnosis | Malignant mast cell tumor                                                     | Neoplasm |
| C964  | ICD-10 Diagnosis | Sarcoma of dendritic cells (accessory cells)                                  | Neoplasm |
| C965  | ICD-10 Diagnosis | Multifocal and unisystemic Langerhans-cell histiocytosis                      | Neoplasm |
| C966  | ICD-10 Diagnosis | Unifocal Langerhans-cell histiocytosis                                        | Neoplasm |
| C969  | ICD-10 Diagnosis | Malignant neoplasm of lymphoid, hematopoietic and related tissue, unspecified | Neoplasm |

|        |                  |                                                                                     |          |
|--------|------------------|-------------------------------------------------------------------------------------|----------|
| C96A   | ICD-10 Diagnosis | Histiocytic sarcoma                                                                 | Neoplasm |
| C96Z   | ICD-10 Diagnosis | Other specified malignant neoplasms of lymphoid, hematopoietic and related tissue   | Neoplasm |
| C021   | ICD-10 Diagnosis | Malignant neoplasm of border of tongue                                              | Neoplasm |
| C0689  | ICD-10 Diagnosis | Malignant neoplasm of overlapping sites of other parts of mouth                     | Neoplasm |
| C4032  | ICD-10 Diagnosis | Malignant neoplasm of short bones of left lower limb                                | Neoplasm |
| C4090  | ICD-10 Diagnosis | Malignant neoplasm of unspecified bones and articular cartilage of unspecified limb | Neoplasm |
| C4092  | ICD-10 Diagnosis | Malignant neoplasm of unspecified bones and articular cartilage of left limb        | Neoplasm |
| C4312  | ICD-10 Diagnosis | Malignant melanoma of left eyelid, including canthus                                | Neoplasm |
| C4650  | ICD-10 Diagnosis | Kaposi's sarcoma of unspecified lung                                                | Neoplasm |
| C488   | ICD-10 Diagnosis | Malignant neoplasm of overlapping sites of retroperitoneum and peritoneum           | Neoplasm |
| C50022 | ICD-10 Diagnosis | Malignant neoplasm of nipple and areola, left male breast                           | Neoplasm |
| C50029 | ICD-10 Diagnosis | Malignant neoplasm of nipple and areola, unspecified male breast                    | Neoplasm |
| C5031  | ICD-10 Diagnosis | Malignant neoplasm of lower-inner quadrant of breast, female                        | Neoplasm |
| C5041  | ICD-10 Diagnosis | Malignant neoplasm of upper-outer quadrant of breast, female                        | Neoplasm |
| C5051  | ICD-10 Diagnosis | Malignant neoplasm of lower-outer quadrant of breast, female                        | Neoplasm |
| C5061  | ICD-10 Diagnosis | Malignant neoplasm of axillary tail of breast, female                               | Neoplasm |
| C5091  | ICD-10 Diagnosis | Malignant neoplasm of breast of unspecified site, female                            | Neoplasm |
| C5092  | ICD-10 Diagnosis | Malignant neoplasm of breast of unspecified site, male                              | Neoplasm |
| C540   | ICD-10 Diagnosis | Malignant neoplasm of isthmus uteri                                                 | Neoplasm |
| C543   | ICD-10 Diagnosis | Malignant neoplasm of fundus uteri                                                  | Neoplasm |
| C602   | ICD-10 Diagnosis | Malignant neoplasm of body of penis                                                 | Neoplasm |
| C6941  | ICD-10 Diagnosis | Malignant neoplasm of right ciliary body                                            | Neoplasm |

|       |                  |                                                                             |          |
|-------|------------------|-----------------------------------------------------------------------------|----------|
| C6992 | ICD-10 Diagnosis | Malignant neoplasm of unspecified site of left eye                          | Neoplasm |
| C8118 | ICD-10 Diagnosis | Nodular sclerosis classical Hodgkin lymphoma, lymph nodes of multiple sites | Neoplasm |
| C8128 | ICD-10 Diagnosis | Mixed cellularity classical Hodgkin lymphoma, lymph nodes of multiple sites | Neoplasm |
| C8193 | ICD-10 Diagnosis | Hodgkin lymphoma, unspecified, intra-abdominal lymph nodes                  | Neoplasm |
| C8196 | ICD-10 Diagnosis | Hodgkin lymphoma, unspecified, intrapelvic lymph nodes                      | Neoplasm |
| C8206 | ICD-10 Diagnosis | Follicular lymphoma grade I, intrapelvic lymph nodes                        | Neoplasm |
| C8219 | ICD-10 Diagnosis | Follicular lymphoma grade II, extranodal and solid organ sites              | Neoplasm |
| C8289 | ICD-10 Diagnosis | Other types of follicular lymphoma, extranodal and solid organ sites        | Neoplasm |
| C8311 | ICD-10 Diagnosis | Mantle cell lymphoma, lymph nodes of head, face, and neck                   | Neoplasm |
| C8358 | ICD-10 Diagnosis | Lymphoblastic (diffuse) lymphoma, lymph nodes of multiple sites             | Neoplasm |
| C8371 | ICD-10 Diagnosis | Burkitt lymphoma, lymph nodes of head, face, and neck                       | Neoplasm |
| C8378 | ICD-10 Diagnosis | Burkitt lymphoma, lymph nodes of multiple sites                             | Neoplasm |
| C8406 | ICD-10 Diagnosis | Mycosis fungoides, intrapelvic lymph nodes                                  | Neoplasm |
| C8528 | ICD-10 Diagnosis | Mediastinal (thymic) large B-cell lymphoma, lymph nodes of multiple sites   | Neoplasm |
| C8582 | ICD-10 Diagnosis | Other specified types of non-Hodgkin lymphoma, intrathoracic lymph nodes    | Neoplasm |
| C9122 | ICD-10 Diagnosis | Other lymphoid leukemia, in relapse                                         | Neoplasm |
| C9260 | ICD-10 Diagnosis | Acute myeloid leukemia with 11q23-abnormality not having achieved remission | Neoplasm |
| C9592 | ICD-10 Diagnosis | Leukemia, unspecified, in relapse                                           | Neoplasm |
| C000  | ICD-10 Diagnosis | Malignant neoplasm of external upper lip                                    | Neoplasm |
| C004  | ICD-10 Diagnosis | Malignant neoplasm of lower lip, inner aspect                               | Neoplasm |
| C008  | ICD-10 Diagnosis | Malignant neoplasm of overlapping sites of lip                              | Neoplasm |

|       |                  |                                                                             |          |
|-------|------------------|-----------------------------------------------------------------------------|----------|
| C002  | ICD-10 Diagnosis | Malignant neoplasm of external lip,<br>unspecified                          | Neoplasm |
| C048  | ICD-10 Diagnosis | Malignant neoplasm of overlapping sites<br>of floor of mouth                | Neoplasm |
| C058  | ICD-10 Diagnosis | Malignant neoplasm of overlapping sites<br>of palate                        | Neoplasm |
| C0680 | ICD-10 Diagnosis | Malignant neoplasm of overlapping sites<br>of unspecified parts of mouth    | Neoplasm |
| C090  | ICD-10 Diagnosis | Malignant neoplasm of tonsillar fossa                                       | Neoplasm |
| C104  | ICD-10 Diagnosis | Malignant neoplasm of branchial cleft                                       | Neoplasm |
| C110  | ICD-10 Diagnosis | Malignant neoplasm of superior wall of<br>nasopharynx                       | Neoplasm |
| C112  | ICD-10 Diagnosis | Malignant neoplasm of lateral wall of<br>nasopharynx                        | Neoplasm |
| C113  | ICD-10 Diagnosis | Malignant neoplasm of anterior wall of<br>nasopharynx                       | Neoplasm |
| C164  | ICD-10 Diagnosis | Malignant neoplasm of pylorus                                               | Neoplasm |
| C161  | ICD-10 Diagnosis | Malignant neoplasm of fundus of<br>stomach                                  | Neoplasm |
| C212  | ICD-10 Diagnosis | Malignant neoplasm of cloacogenic zone                                      | Neoplasm |
| C222  | ICD-10 Diagnosis | Hepatoblastoma                                                              | Neoplasm |
| C223  | ICD-10 Diagnosis | Angiosarcoma of liver                                                       | Neoplasm |
| C224  | ICD-10 Diagnosis | Other sarcomas of liver                                                     | Neoplasm |
| C248  | ICD-10 Diagnosis | Malignant neoplasm of overlapping sites<br>of biliary tract                 | Neoplasm |
| C261  | ICD-10 Diagnosis | Malignant neoplasm of spleen                                                | Neoplasm |
| C318  | ICD-10 Diagnosis | Malignant neoplasm of overlapping sites<br>of accessory sinuses             | Neoplasm |
| C452  | ICD-10 Diagnosis | Mesothelioma of pericardium                                                 | Neoplasm |
| C388  | ICD-10 Diagnosis | Malignant neoplasm of overlapping sites<br>of heart, mediastinum and pleura | Neoplasm |
| C4010 | ICD-10 Diagnosis | Malignant neoplasm of short bones of<br>unspecified upper limb              | Neoplasm |
| C4011 | ICD-10 Diagnosis | Malignant neoplasm of short bones of<br>right upper limb                    | Neoplasm |
| C4020 | ICD-10 Diagnosis | Malignant neoplasm of long bones of<br>unspecified lower limb               | Neoplasm |
| C4030 | ICD-10 Diagnosis | Malignant neoplasm of short bones of<br>unspecified lower limb              | Neoplasm |
| C4031 | ICD-10 Diagnosis | Malignant neoplasm of short bones of<br>right lower limb                    | Neoplasm |

|       |                  |                                                                                                |          |
|-------|------------------|------------------------------------------------------------------------------------------------|----------|
| C4080 | ICD-10 Diagnosis | Malignant neoplasm of overlapping sites of bone and articular cartilage of unspecified limb    | Neoplasm |
| C4081 | ICD-10 Diagnosis | Malignant neoplasm of overlapping sites of bone and articular cartilage of right limb          | Neoplasm |
| C4082 | ICD-10 Diagnosis | Malignant neoplasm of overlapping sites of bone and articular cartilage of left limb           | Neoplasm |
| C4091 | ICD-10 Diagnosis | Malignant neoplasm of unspecified bones and articular cartilage of right limb                  | Neoplasm |
| C470  | ICD-10 Diagnosis | Malignant neoplasm of peripheral nerves of head, face and neck                                 | Neoplasm |
| C4711 | ICD-10 Diagnosis | Malignant neoplasm of peripheral nerves of right upper limb, including shoulder                | Neoplasm |
| C4712 | ICD-10 Diagnosis | Malignant neoplasm of peripheral nerves of left upper limb, including shoulder                 | Neoplasm |
| C4910 | ICD-10 Diagnosis | Malignant neoplasm of connective and soft tissue of unspecified upper limb, including shoulder | Neoplasm |
| C4720 | ICD-10 Diagnosis | Malignant neoplasm of peripheral nerves of unspecified lower limb, including hip               | Neoplasm |
| C4722 | ICD-10 Diagnosis | Malignant neoplasm of peripheral nerves of left lower limb, including hip                      | Neoplasm |
| C474  | ICD-10 Diagnosis | Malignant neoplasm of peripheral nerves of abdomen                                             | Neoplasm |
| C476  | ICD-10 Diagnosis | Malignant neoplasm of peripheral nerves of trunk, unspecified                                  | Neoplasm |
| C478  | ICD-10 Diagnosis | Malignant neoplasm of overlapping sites of peripheral nerves and autonomic nervous system      | Neoplasm |
| C498  | ICD-10 Diagnosis | Malignant neoplasm of overlapping sites of connective and soft tissue                          | Neoplasm |
| C430  | ICD-10 Diagnosis | Malignant melanoma of lip                                                                      | Neoplasm |
| C4310 | ICD-10 Diagnosis | Malignant melanoma of unspecified eyelid, including canthus                                    | Neoplasm |
| C4320 | ICD-10 Diagnosis | Malignant melanoma of unspecified ear and external auricular canal                             | Neoplasm |
| C4351 | ICD-10 Diagnosis | Malignant melanoma of anal skin                                                                | Neoplasm |
| C4352 | ICD-10 Diagnosis | Malignant melanoma of skin of breast                                                           | Neoplasm |

|        |                  |                                                                          |          |
|--------|------------------|--------------------------------------------------------------------------|----------|
| C438   | ICD-10 Diagnosis | Malignant melanoma of overlapping sites<br>of skin                       | Neoplasm |
| C50021 | ICD-10 Diagnosis | Malignant neoplasm of nipple and areola,<br>right male breast            | Neoplasm |
| C50121 | ICD-10 Diagnosis | Malignant neoplasm of central portion of<br>right male breast            | Neoplasm |
| C50122 | ICD-10 Diagnosis | Malignant neoplasm of central portion of<br>left male breast             | Neoplasm |
| C50129 | ICD-10 Diagnosis | Malignant neoplasm of central portion of<br>unspecified male breast      | Neoplasm |
| C50221 | ICD-10 Diagnosis | Malignant neoplasm of upper-inner<br>quadrant of right male breast       | Neoplasm |
| C50222 | ICD-10 Diagnosis | Malignant neoplasm of upper-inner<br>quadrant of left male breast        | Neoplasm |
| C50229 | ICD-10 Diagnosis | Malignant neoplasm of upper-inner<br>quadrant of unspecified male breast | Neoplasm |
| C50321 | ICD-10 Diagnosis | Malignant neoplasm of lower-inner<br>quadrant of right male breast       | Neoplasm |
| C50322 | ICD-10 Diagnosis | Malignant neoplasm of lower-inner<br>quadrant of left male breast        | Neoplasm |
| C50329 | ICD-10 Diagnosis | Malignant neoplasm of lower-inner<br>quadrant of unspecified male breast | Neoplasm |
| C50421 | ICD-10 Diagnosis | Malignant neoplasm of upper-outer<br>quadrant of right male breast       | Neoplasm |
| C50422 | ICD-10 Diagnosis | Malignant neoplasm of upper-outer<br>quadrant of left male breast        | Neoplasm |
| C50429 | ICD-10 Diagnosis | Malignant neoplasm of upper-outer<br>quadrant of unspecified male breast | Neoplasm |
| C50522 | ICD-10 Diagnosis | Malignant neoplasm of lower-outer<br>quadrant of left male breast        | Neoplasm |
| C50529 | ICD-10 Diagnosis | Malignant neoplasm of lower-outer<br>quadrant of unspecified male breast | Neoplasm |
| C50621 | ICD-10 Diagnosis | Malignant neoplasm of axillary tail of<br>right male breast              | Neoplasm |
| C50622 | ICD-10 Diagnosis | Malignant neoplasm of axillary tail of left<br>male breast               | Neoplasm |
| C50629 | ICD-10 Diagnosis | Malignant neoplasm of axillary tail of<br>unspecified male breast        | Neoplasm |
| C50821 | ICD-10 Diagnosis | Malignant neoplasm of overlapping sites<br>of right male breast          | Neoplasm |
| C50822 | ICD-10 Diagnosis | Malignant neoplasm of overlapping sites<br>of left male breast           | Neoplasm |
| C50829 | ICD-10 Diagnosis | Malignant neoplasm of overlapping sites<br>of unspecified male breast    | Neoplasm |
| C464   | ICD-10 Diagnosis | Kaposi's sarcoma of gastrointestinal sites                               | Neoplasm |
| C4651  | ICD-10 Diagnosis | Kaposi's sarcoma of right lung                                           | Neoplasm |



|       |                  |                                                             |          |
|-------|------------------|-------------------------------------------------------------|----------|
| C4652 | ICD-10 Diagnosis | Kaposi's sarcoma of left lung                               | Neoplasm |
| C531  | ICD-10 Diagnosis | Malignant neoplasm of exocervix                             | Neoplasm |
| C573  | ICD-10 Diagnosis | Malignant neoplasm of parametrium                           | Neoplasm |
| C511  | ICD-10 Diagnosis | Malignant neoplasm of labium minus                          | Neoplasm |
| C512  | ICD-10 Diagnosis | Malignant neoplasm of clitoris                              | Neoplasm |
| C577  | ICD-10 Diagnosis | Malignant neoplasm of other specified female genital organs | Neoplasm |
| C6201 | ICD-10 Diagnosis | Malignant neoplasm of undescended right testis              | Neoplasm |
| C6300 | ICD-10 Diagnosis | Malignant neoplasm of unspecified epididymis                | Neoplasm |
| C6301 | ICD-10 Diagnosis | Malignant neoplasm of right epididymis                      | Neoplasm |
| C6302 | ICD-10 Diagnosis | Malignant neoplasm of left epididymis                       | Neoplasm |
| C6310 | ICD-10 Diagnosis | Malignant neoplasm of unspecified spermatic cord            | Neoplasm |
| C6311 | ICD-10 Diagnosis | Malignant neoplasm of right spermatic cord                  | Neoplasm |
| C6312 | ICD-10 Diagnosis | Malignant neoplasm of left spermatic cord                   | Neoplasm |
| C632  | ICD-10 Diagnosis | Malignant neoplasm of scrotum                               | Neoplasm |
| C637  | ICD-10 Diagnosis | Malignant neoplasm of other specified male genital organs   | Neoplasm |
| C677  | ICD-10 Diagnosis | Malignant neoplasm of urachus                               | Neoplasm |
| C6940 | ICD-10 Diagnosis | Malignant neoplasm of unspecified ciliary body              | Neoplasm |
| C6942 | ICD-10 Diagnosis | Malignant neoplasm of left ciliary body                     | Neoplasm |
| C6960 | ICD-10 Diagnosis | Malignant neoplasm of unspecified orbit                     | Neoplasm |
| C6961 | ICD-10 Diagnosis | Malignant neoplasm of right orbit                           | Neoplasm |
| C6962 | ICD-10 Diagnosis | Malignant neoplasm of left orbit                            | Neoplasm |
| C6950 | ICD-10 Diagnosis | Malignant neoplasm of unspecified lacrimal gland and duct   | Neoplasm |
| C6951 | ICD-10 Diagnosis | Malignant neoplasm of right lacrimal gland and duct         | Neoplasm |
| C6900 | ICD-10 Diagnosis | Malignant neoplasm of unspecified conjunctiva               | Neoplasm |
| C6910 | ICD-10 Diagnosis | Malignant neoplasm of unspecified cornea                    | Neoplasm |
| C6911 | ICD-10 Diagnosis | Malignant neoplasm of right cornea                          | Neoplasm |
| C6912 | ICD-10 Diagnosis | Malignant neoplasm of left cornea                           | Neoplasm |
| C6920 | ICD-10 Diagnosis | Malignant neoplasm of unspecified retina                    | Neoplasm |

|       |                  |                                                                                       |          |
|-------|------------------|---------------------------------------------------------------------------------------|----------|
| C6921 | ICD-10 Diagnosis | Malignant neoplasm of right retina                                                    | Neoplasm |
| C6922 | ICD-10 Diagnosis | Malignant neoplasm of left retina                                                     | Neoplasm |
| C6980 | ICD-10 Diagnosis | Malignant neoplasm of overlapping sites<br>of unspecified eye and adnexa              | Neoplasm |
| C6981 | ICD-10 Diagnosis | Malignant neoplasm of overlapping sites<br>of right eye and adnexa                    | Neoplasm |
| C6982 | ICD-10 Diagnosis | Malignant neoplasm of overlapping sites<br>of left eye and adnexa                     | Neoplasm |
| C6991 | ICD-10 Diagnosis | Malignant neoplasm of unspecified site<br>of right eye                                | Neoplasm |
| C7220 | ICD-10 Diagnosis | Malignant neoplasm of unspecified<br>olfactory nerve                                  | Neoplasm |
| C7221 | ICD-10 Diagnosis | Malignant neoplasm of right olfactory<br>nerve                                        | Neoplasm |
| C7222 | ICD-10 Diagnosis | Malignant neoplasm of left olfactory<br>nerve                                         | Neoplasm |
| C7230 | ICD-10 Diagnosis | Malignant neoplasm of unspecified optic<br>nerve                                      | Neoplasm |
| C7240 | ICD-10 Diagnosis | Malignant neoplasm of unspecified<br>acoustic nerve                                   | Neoplasm |
| C7242 | ICD-10 Diagnosis | Malignant neoplasm of left acoustic<br>nerve                                          | Neoplasm |
| C7401 | ICD-10 Diagnosis | Malignant neoplasm of cortex of right<br>adrenal gland                                | Neoplasm |
| C752  | ICD-10 Diagnosis | Malignant neoplasm of craniopharyngeal<br>duct                                        | Neoplasm |
| C755  | ICD-10 Diagnosis | Malignant neoplasm of aortic body and<br>other paraganglia                            | Neoplasm |
| C758  | ICD-10 Diagnosis | Malignant neoplasm with pluriglandular<br>involvement, unspecified                    | Neoplasm |
| C7650 | ICD-10 Diagnosis | Malignant neoplasm of unspecified lower<br>limb                                       | Neoplasm |
| C8337 | ICD-10 Diagnosis | Diffuse large B-cell lymphoma, spleen                                                 | Neoplasm |
| C8359 | ICD-10 Diagnosis | Lymphoblastic (diffuse) lymphoma,<br>extranodal and solid organ sites                 | Neoplasm |
| C8352 | ICD-10 Diagnosis | Lymphoblastic (diffuse) lymphoma,<br>intrathoracic lymph nodes                        | Neoplasm |
| C8353 | ICD-10 Diagnosis | Lymphoblastic (diffuse) lymphoma, intra-<br>abdominal lymph nodes                     | Neoplasm |
| C8354 | ICD-10 Diagnosis | Lymphoblastic (diffuse) lymphoma,<br>lymph nodes of axilla and upper limb             | Neoplasm |
| C8355 | ICD-10 Diagnosis | Lymphoblastic (diffuse) lymphoma,<br>lymph nodes of inguinal region and lower<br>limb | Neoplasm |

|       |                  |                                                                                   |          |
|-------|------------------|-----------------------------------------------------------------------------------|----------|
| C8356 | ICD-10 Diagnosis | Lymphoblastic (diffuse) lymphoma, intrapelvic lymph nodes                         | Neoplasm |
| C8372 | ICD-10 Diagnosis | Burkitt lymphoma, intrathoracic lymph nodes                                       | Neoplasm |
| C8373 | ICD-10 Diagnosis | Burkitt lymphoma, intra-abdominal lymph nodes                                     | Neoplasm |
| C8382 | ICD-10 Diagnosis | Other non-follicular lymphoma, intrathoracic lymph nodes                          | Neoplasm |
| C8383 | ICD-10 Diagnosis | Other non-follicular lymphoma, intra-abdominal lymph nodes                        | Neoplasm |
| C8385 | ICD-10 Diagnosis | Other non-follicular lymphoma, lymph nodes of inguinal region and lower limb      | Neoplasm |
| C8386 | ICD-10 Diagnosis | Other non-follicular lymphoma, intrapelvic lymph nodes                            | Neoplasm |
| C8387 | ICD-10 Diagnosis | Other non-follicular lymphoma, spleen                                             | Neoplasm |
| C8388 | ICD-10 Diagnosis | Other non-follicular lymphoma, lymph nodes of multiple sites                      | Neoplasm |
| C8316 | ICD-10 Diagnosis | Mantle cell lymphoma, intrapelvic lymph nodes                                     | Neoplasm |
| C8317 | ICD-10 Diagnosis | Mantle cell lymphoma, spleen                                                      | Neoplasm |
| C8384 | ICD-10 Diagnosis | Other non-follicular lymphoma, lymph nodes of axilla and upper limb               | Neoplasm |
| C8460 | ICD-10 Diagnosis | Anaplastic large cell lymphoma, ALK-positive, unspecified site                    | Neoplasm |
| C8469 | ICD-10 Diagnosis | Anaplastic large cell lymphoma, ALK-positive, extranodal and solid organ sites    | Neoplasm |
| C8479 | ICD-10 Diagnosis | Anaplastic large cell lymphoma, ALK-negative, extranodal and solid organ sites    | Neoplasm |
| C8461 | ICD-10 Diagnosis | Anaplastic large cell lymphoma, ALK-positive, lymph nodes of head, face, and neck | Neoplasm |
| C8471 | ICD-10 Diagnosis | Anaplastic large cell lymphoma, ALK-negative, lymph nodes of head, face, and neck | Neoplasm |
| C8462 | ICD-10 Diagnosis | Anaplastic large cell lymphoma, ALK-positive, intrathoracic lymph nodes           | Neoplasm |
| C8472 | ICD-10 Diagnosis | Anaplastic large cell lymphoma, ALK-negative, intrathoracic lymph nodes           | Neoplasm |
| C8463 | ICD-10 Diagnosis | Anaplastic large cell lymphoma, ALK-positive, intra-abdominal lymph nodes         | Neoplasm |

|       |                  |                                                                                             |          |
|-------|------------------|---------------------------------------------------------------------------------------------|----------|
| C8473 | ICD-10 Diagnosis | Anaplastic large cell lymphoma, ALK-negative, intra-abdominal lymph nodes                   | Neoplasm |
| C8464 | ICD-10 Diagnosis | Anaplastic large cell lymphoma, ALK-positive, lymph nodes of axilla and upper limb          | Neoplasm |
| C8465 | ICD-10 Diagnosis | Anaplastic large cell lymphoma, ALK-positive, lymph nodes of inguinal region and lower limb | Neoplasm |
| C8475 | ICD-10 Diagnosis | Anaplastic large cell lymphoma, ALK-negative, lymph nodes of inguinal region and lower limb | Neoplasm |
| C8466 | ICD-10 Diagnosis | Anaplastic large cell lymphoma, ALK-positive, intrapelvic lymph nodes                       | Neoplasm |
| C8476 | ICD-10 Diagnosis | Anaplastic large cell lymphoma, ALK-negative, intrapelvic lymph nodes                       | Neoplasm |
| C8468 | ICD-10 Diagnosis | Anaplastic large cell lymphoma, ALK-positive, lymph nodes of multiple sites                 | Neoplasm |
| C8529 | ICD-10 Diagnosis | Mediastinal (thymic) large B-cell lymphoma, extranodal and solid organ sites                | Neoplasm |
| C8521 | ICD-10 Diagnosis | Mediastinal (thymic) large B-cell lymphoma, lymph nodes of head, face, and neck             | Neoplasm |
| C8522 | ICD-10 Diagnosis | Mediastinal (thymic) large B-cell lymphoma, intrathoracic lymph nodes                       | Neoplasm |
| C8523 | ICD-10 Diagnosis | Mediastinal (thymic) large B-cell lymphoma, intra-abdominal lymph nodes                     | Neoplasm |
| C8524 | ICD-10 Diagnosis | Mediastinal (thymic) large B-cell lymphoma, lymph nodes of axilla and upper limb            | Neoplasm |
| C8525 | ICD-10 Diagnosis | Mediastinal (thymic) large B-cell lymphoma, lymph nodes of inguinal region and lower limb   | Neoplasm |
| C8526 | ICD-10 Diagnosis | Mediastinal (thymic) large B-cell lymphoma, intrapelvic lymph nodes                         | Neoplasm |
| C8527 | ICD-10 Diagnosis | Mediastinal (thymic) large B-cell lymphoma, spleen                                          | Neoplasm |
| C8399 | ICD-10 Diagnosis | Non-follicular (diffuse) lymphoma, unspecified, extranodal and solid organ sites            | Neoplasm |
| C8301 | ICD-10 Diagnosis | Small cell B-cell lymphoma, lymph nodes of head, face, and neck                             | Neoplasm |

|       |                  |                                                                                               |          |
|-------|------------------|-----------------------------------------------------------------------------------------------|----------|
| C8391 | ICD-10 Diagnosis | Non-follicular (diffuse) lymphoma, unspecified, lymph nodes of head, face, and neck           | Neoplasm |
| C8303 | ICD-10 Diagnosis | Small cell B-cell lymphoma, intra-abdominal lymph nodes                                       | Neoplasm |
| C8393 | ICD-10 Diagnosis | Non-follicular (diffuse) lymphoma, unspecified, intra-abdominal lymph nodes                   | Neoplasm |
| C8394 | ICD-10 Diagnosis | Non-follicular (diffuse) lymphoma, unspecified, lymph nodes of axilla and upper limb          | Neoplasm |
| C8395 | ICD-10 Diagnosis | Non-follicular (diffuse) lymphoma, unspecified, lymph nodes of inguinal region and lower limb | Neoplasm |
| C8396 | ICD-10 Diagnosis | Non-follicular (diffuse) lymphoma, unspecified, intrapelvic lymph nodes                       | Neoplasm |
| C8397 | ICD-10 Diagnosis | Non-follicular (diffuse) lymphoma, unspecified, spleen                                        | Neoplasm |
| C8170 | ICD-10 Diagnosis | Other classical Hodgkin lymphoma, unspecified site                                            | Neoplasm |
| C8179 | ICD-10 Diagnosis | Other classical Hodgkin lymphoma, extranodal and solid organ sites                            | Neoplasm |
| C8171 | ICD-10 Diagnosis | Other classical Hodgkin lymphoma, lymph nodes of head, face, and neck                         | Neoplasm |
| C8109 | ICD-10 Diagnosis | Nodular lymphocyte predominant Hodgkin lymphoma, extranodal and solid organ sites             | Neoplasm |
| C8149 | ICD-10 Diagnosis | Lymphocyte-rich classical Hodgkin lymphoma, extranodal and solid organ sites                  | Neoplasm |
| C8101 | ICD-10 Diagnosis | Nodular lymphocyte predominant Hodgkin lymphoma, lymph nodes of head, face, and neck          | Neoplasm |
| C8141 | ICD-10 Diagnosis | Lymphocyte-rich classical Hodgkin lymphoma, lymph nodes of head, face, and neck               | Neoplasm |
| C8104 | ICD-10 Diagnosis | Nodular lymphocyte predominant Hodgkin lymphoma, lymph nodes of axilla and upper limb         | Neoplasm |
| C8144 | ICD-10 Diagnosis | Lymphocyte-rich classical Hodgkin lymphoma, lymph nodes of axilla and upper limb              | Neoplasm |
| C8108 | ICD-10 Diagnosis | Nodular lymphocyte predominant Hodgkin lymphoma, lymph nodes of multiple sites                | Neoplasm |

|       |                  |                                                                                    |          |
|-------|------------------|------------------------------------------------------------------------------------|----------|
| C8148 | ICD-10 Diagnosis | Lymphocyte-rich classical Hodgkin lymphoma, lymph nodes of multiple sites          | Neoplasm |
| C8110 | ICD-10 Diagnosis | Nodular sclerosis classical Hodgkin lymphoma, unspecified site                     | Neoplasm |
| C8119 | ICD-10 Diagnosis | Nodular sclerosis classical Hodgkin lymphoma, extranodal and solid organ sites     | Neoplasm |
| C8113 | ICD-10 Diagnosis | Nodular sclerosis classical Hodgkin lymphoma, intra-abdominal lymph nodes          | Neoplasm |
| C8114 | ICD-10 Diagnosis | Nodular sclerosis classical Hodgkin lymphoma, lymph nodes of axilla and upper limb | Neoplasm |
| C8116 | ICD-10 Diagnosis | Nodular sclerosis classical Hodgkin lymphoma, intrapelvic lymph nodes              | Neoplasm |
| C8130 | ICD-10 Diagnosis | Lymphocyte depleted classical Hodgkin lymphoma, unspecified site                   | Neoplasm |
| C8139 | ICD-10 Diagnosis | Lymphocyte depleted classical Hodgkin lymphoma, extranodal and solid organ sites   | Neoplasm |
| C8138 | ICD-10 Diagnosis | Lymphocyte depleted classical Hodgkin lymphoma, lymph nodes of multiple sites      | Neoplasm |
| C8199 | ICD-10 Diagnosis | Hodgkin lymphoma, unspecified, extranodal and solid organ sites                    | Neoplasm |
| C8192 | ICD-10 Diagnosis | Hodgkin lymphoma, unspecified, intrathoracic lymph nodes                           | Neoplasm |
| C8194 | ICD-10 Diagnosis | Hodgkin lymphoma, unspecified, lymph nodes of axilla and upper limb                | Neoplasm |
| C8198 | ICD-10 Diagnosis | Hodgkin lymphoma, unspecified, lymph nodes of multiple sites                       | Neoplasm |
| C8229 | ICD-10 Diagnosis | Follicular lymphoma grade III, unspecified, extranodal and solid organ sites       | Neoplasm |
| C8239 | ICD-10 Diagnosis | Follicular lymphoma grade IIIa, extranodal and solid organ sites                   | Neoplasm |
| C8240 | ICD-10 Diagnosis | Follicular lymphoma grade IIIb, unspecified site                                   | Neoplasm |
| C8249 | ICD-10 Diagnosis | Follicular lymphoma grade IIIb, extranodal and solid organ sites                   | Neoplasm |
| C8260 | ICD-10 Diagnosis | Cutaneous follicle center lymphoma, unspecified site                               | Neoplasm |

|       |                  |                                                                                  |          |
|-------|------------------|----------------------------------------------------------------------------------|----------|
| C8269 | ICD-10 Diagnosis | Cutaneous follicle center lymphoma, extranodal and solid organ sites             | Neoplasm |
| C8211 | ICD-10 Diagnosis | Follicular lymphoma grade II, lymph nodes of head, face, and neck                | Neoplasm |
| C8231 | ICD-10 Diagnosis | Follicular lymphoma grade IIIa, lymph nodes of head, face, and neck              | Neoplasm |
| C8241 | ICD-10 Diagnosis | Follicular lymphoma grade IIIb, lymph nodes of head, face, and neck              | Neoplasm |
| C8261 | ICD-10 Diagnosis | Cutaneous follicle center lymphoma, lymph nodes of head, face, and neck          | Neoplasm |
| C8212 | ICD-10 Diagnosis | Follicular lymphoma grade II, intrathoracic lymph nodes                          | Neoplasm |
| C8222 | ICD-10 Diagnosis | Follicular lymphoma grade III, unspecified, intrathoracic lymph nodes            | Neoplasm |
| C8232 | ICD-10 Diagnosis | Follicular lymphoma grade IIIa, intrathoracic lymph nodes                        | Neoplasm |
| C8242 | ICD-10 Diagnosis | Follicular lymphoma grade IIIb, intrathoracic lymph nodes                        | Neoplasm |
| C8262 | ICD-10 Diagnosis | Cutaneous follicle center lymphoma, intrathoracic lymph nodes                    | Neoplasm |
| C8282 | ICD-10 Diagnosis | Other types of follicular lymphoma, intrathoracic lymph nodes                    | Neoplasm |
| C8223 | ICD-10 Diagnosis | Follicular lymphoma grade III, unspecified, intra-abdominal lymph nodes          | Neoplasm |
| C8233 | ICD-10 Diagnosis | Follicular lymphoma grade IIIa, intra-abdominal lymph nodes                      | Neoplasm |
| C8243 | ICD-10 Diagnosis | Follicular lymphoma grade IIIb, intra-abdominal lymph nodes                      | Neoplasm |
| C8263 | ICD-10 Diagnosis | Cutaneous follicle center lymphoma, intra-abdominal lymph nodes                  | Neoplasm |
| C8283 | ICD-10 Diagnosis | Other types of follicular lymphoma, intra-abdominal lymph nodes                  | Neoplasm |
| C8293 | ICD-10 Diagnosis | Follicular lymphoma, unspecified, intra-abdominal lymph nodes                    | Neoplasm |
| C8214 | ICD-10 Diagnosis | Follicular lymphoma grade II, lymph nodes of axilla and upper limb               | Neoplasm |
| C8224 | ICD-10 Diagnosis | Follicular lymphoma grade III, unspecified, lymph nodes of axilla and upper limb | Neoplasm |

|       |                  |                                                                                           |          |
|-------|------------------|-------------------------------------------------------------------------------------------|----------|
| C8244 | ICD-10 Diagnosis | Follicular lymphoma grade IIIb, lymph nodes of axilla and upper limb                      | Neoplasm |
| C8264 | ICD-10 Diagnosis | Cutaneous follicle center lymphoma, lymph nodes of axilla and upper limb                  | Neoplasm |
| C8284 | ICD-10 Diagnosis | Other types of follicular lymphoma, lymph nodes of axilla and upper limb                  | Neoplasm |
| C8225 | ICD-10 Diagnosis | Follicular lymphoma grade III, unspecified, lymph nodes of inguinal region and lower limb | Neoplasm |
| C8245 | ICD-10 Diagnosis | Follicular lymphoma grade IIIb, lymph nodes of inguinal region and lower limb             | Neoplasm |
| C8265 | ICD-10 Diagnosis | Cutaneous follicle center lymphoma, lymph nodes of inguinal region and lower limb         | Neoplasm |
| C8285 | ICD-10 Diagnosis | Other types of follicular lymphoma, lymph nodes of inguinal region and lower limb         | Neoplasm |
| C8216 | ICD-10 Diagnosis | Follicular lymphoma grade II, intrapelvic lymph nodes                                     | Neoplasm |
| C8226 | ICD-10 Diagnosis | Follicular lymphoma grade III, unspecified, intrapelvic lymph nodes                       | Neoplasm |
| C8236 | ICD-10 Diagnosis | Follicular lymphoma grade IIIa, intrapelvic lymph nodes                                   | Neoplasm |
| C8246 | ICD-10 Diagnosis | Follicular lymphoma grade IIIb, intrapelvic lymph nodes                                   | Neoplasm |
| C8266 | ICD-10 Diagnosis | Cutaneous follicle center lymphoma, intrapelvic lymph nodes                               | Neoplasm |
| C8286 | ICD-10 Diagnosis | Other types of follicular lymphoma, intrapelvic lymph nodes                               | Neoplasm |
| C8296 | ICD-10 Diagnosis | Follicular lymphoma, unspecified, intrapelvic lymph nodes                                 | Neoplasm |
| C8248 | ICD-10 Diagnosis | Follicular lymphoma grade IIIb, lymph nodes of multiple sites                             | Neoplasm |
| C8268 | ICD-10 Diagnosis | Cutaneous follicle center lymphoma, lymph nodes of multiple sites                         | Neoplasm |
| C8401 | ICD-10 Diagnosis | Mycosis fungoides, lymph nodes of head, face, and neck                                    | Neoplasm |
| C8403 | ICD-10 Diagnosis | Mycosis fungoides, intra-abdominal lymph nodes                                            | Neoplasm |
| C8404 | ICD-10 Diagnosis | Mycosis fungoides, lymph nodes of axilla and upper limb                                   | Neoplasm |



|       |                  |                                                                              |          |
|-------|------------------|------------------------------------------------------------------------------|----------|
| C8407 | ICD-10 Diagnosis | Mycosis fungoides, spleen                                                    | Neoplasm |
| C8408 | ICD-10 Diagnosis | Mycosis fungoides, lymph nodes of multiple sites                             | Neoplasm |
| C8415 | ICD-10 Diagnosis | Sezary disease, lymph nodes of inguinal region and lower limb                | Neoplasm |
| C9142 | ICD-10 Diagnosis | Hairy cell leukemia, in relapse                                              | Neoplasm |
| C960  | ICD-10 Diagnosis | Multifocal and multisystemic (disseminated) Langerhans-cell histiocytosis    | Neoplasm |
| C8442 | ICD-10 Diagnosis | Peripheral T-cell lymphoma, not classified, intrathoracic lymph nodes        | Neoplasm |
| C8250 | ICD-10 Diagnosis | Diffuse follicle center lymphoma, unspecified site                           | Neoplasm |
| C8259 | ICD-10 Diagnosis | Diffuse follicle center lymphoma, extranodal and solid organ sites           | Neoplasm |
| C8490 | ICD-10 Diagnosis | Mature T/NK-cell lymphomas, unspecified, unspecified site                    | Neoplasm |
| C8499 | ICD-10 Diagnosis | Mature T/NK-cell lymphomas, unspecified, extranodal and solid organ sites    | Neoplasm |
| C84Z0 | ICD-10 Diagnosis | Other mature T/NK-cell lymphomas, unspecified site                           | Neoplasm |
| C84Z9 | ICD-10 Diagnosis | Other mature T/NK-cell lymphomas, extranodal and solid organ sites           | Neoplasm |
| C8491 | ICD-10 Diagnosis | Mature T/NK-cell lymphomas, unspecified, lymph nodes of head, face, and neck | Neoplasm |
| C84A1 | ICD-10 Diagnosis | Cutaneous T-cell lymphoma, unspecified lymph nodes of head, face, and neck   | Neoplasm |
| C84Z1 | ICD-10 Diagnosis | Other mature T/NK-cell lymphomas, lymph nodes of head, face, and neck        | Neoplasm |
| C8252 | ICD-10 Diagnosis | Diffuse follicle center lymphoma, intrathoracic lymph nodes                  | Neoplasm |
| C8492 | ICD-10 Diagnosis | Mature T/NK-cell lymphomas, unspecified, intrathoracic lymph nodes           | Neoplasm |
| C84A2 | ICD-10 Diagnosis | Cutaneous T-cell lymphoma, unspecified, intrathoracic lymph nodes            | Neoplasm |
| C84Z2 | ICD-10 Diagnosis | Other mature T/NK-cell lymphomas, intrathoracic lymph nodes                  | Neoplasm |
| C8592 | ICD-10 Diagnosis | Non-Hodgkin lymphoma, unspecified, intrathoracic lymph nodes                 | Neoplasm |

|       |                  |                                                                                        |          |
|-------|------------------|----------------------------------------------------------------------------------------|----------|
| C8253 | ICD-10 Diagnosis | Diffuse follicle center lymphoma, intra-abdominal lymph nodes                          | Neoplasm |
| C8493 | ICD-10 Diagnosis | Mature T/NK-cell lymphomas, unspecified, intra-abdominal lymph nodes                   | Neoplasm |
| C84A3 | ICD-10 Diagnosis | Cutaneous T-cell lymphoma, unspecified, intra-abdominal lymph nodes                    | Neoplasm |
| C84Z3 | ICD-10 Diagnosis | Other mature T/NK-cell lymphomas, intra-abdominal lymph nodes                          | Neoplasm |
| C8254 | ICD-10 Diagnosis | Diffuse follicle center lymphoma, lymph nodes of axilla and upper limb                 | Neoplasm |
| C8494 | ICD-10 Diagnosis | Mature T/NK-cell lymphomas, unspecified, lymph nodes of axilla and upper limb          | Neoplasm |
| C84A4 | ICD-10 Diagnosis | Cutaneous T-cell lymphoma, unspecified, lymph nodes of axilla and upper limb           | Neoplasm |
| C84Z4 | ICD-10 Diagnosis | Other mature T/NK-cell lymphomas, lymph nodes of axilla and upper limb                 | Neoplasm |
| C8255 | ICD-10 Diagnosis | Diffuse follicle center lymphoma, lymph nodes of inguinal region and lower limb        | Neoplasm |
| C8495 | ICD-10 Diagnosis | Mature T/NK-cell lymphomas, unspecified, lymph nodes of inguinal region and lower limb | Neoplasm |
| C84A5 | ICD-10 Diagnosis | Cutaneous T-cell lymphoma, unspecified, lymph nodes of inguinal region and lower limb  | Neoplasm |
| C84Z5 | ICD-10 Diagnosis | Other mature T/NK-cell lymphomas, lymph nodes of inguinal region and lower limb        | Neoplasm |
| C8256 | ICD-10 Diagnosis | Diffuse follicle center lymphoma, intrapelvic lymph nodes                              | Neoplasm |
| C8496 | ICD-10 Diagnosis | Mature T/NK-cell lymphomas, unspecified, intrapelvic lymph nodes                       | Neoplasm |
| C84A6 | ICD-10 Diagnosis | Cutaneous T-cell lymphoma, unspecified, intrapelvic lymph nodes                        | Neoplasm |
| C84Z6 | ICD-10 Diagnosis | Other mature T/NK-cell lymphomas, intrapelvic lymph nodes                              | Neoplasm |
| C8586 | ICD-10 Diagnosis | Other specified types of non-Hodgkin lymphoma, intrapelvic lymph nodes                 | Neoplasm |

|       |                  |                                                                                  |          |
|-------|------------------|----------------------------------------------------------------------------------|----------|
| C8257 | ICD-10 Diagnosis | Diffuse follicle center lymphoma, spleen                                         | Neoplasm |
| C8497 | ICD-10 Diagnosis | Mature T/NK-cell lymphomas, unspecified, spleen                                  | Neoplasm |
| C84A7 | ICD-10 Diagnosis | Cutaneous T-cell lymphoma, unspecified, spleen                                   | Neoplasm |
| C84Z7 | ICD-10 Diagnosis | Other mature T/NK-cell lymphomas, spleen                                         | Neoplasm |
| C8517 | ICD-10 Diagnosis | Unspecified B-cell lymphoma, spleen                                              | Neoplasm |
| C8258 | ICD-10 Diagnosis | Diffuse follicle center lymphoma, lymph nodes of multiple sites                  | Neoplasm |
| C8498 | ICD-10 Diagnosis | Mature T/NK-cell lymphomas, unspecified, lymph nodes of multiple sites           | Neoplasm |
| C84A8 | ICD-10 Diagnosis | Cutaneous T-cell lymphoma, unspecified, lymph nodes of multiple sites            | Neoplasm |
| C84Z8 | ICD-10 Diagnosis | Other mature T/NK-cell lymphomas, lymph nodes of multiple sites                  | Neoplasm |
| C883  | ICD-10 Diagnosis | Immunoproliferative small intestinal disease                                     | Neoplasm |
| C889  | ICD-10 Diagnosis | Malignant immunoproliferative disease, unspecified                               | Neoplasm |
| C9021 | ICD-10 Diagnosis | Extramедullary plasmacytoma in remission                                         | Neoplasm |
| C9031 | ICD-10 Diagnosis | Solitary plasmacytoma in remission                                               | Neoplasm |
| C9022 | ICD-10 Diagnosis | Extramедullary plasmacytoma in relapse                                           | Neoplasm |
| C9130 | ICD-10 Diagnosis | Prolymphocytic leukemia of B-cell type not having achieved remission             | Neoplasm |
| C9150 | ICD-10 Diagnosis | Adult T-cell lymphoma/leukemia (HTLV-1-associated) not having achieved remission | Neoplasm |
| C9160 | ICD-10 Diagnosis | Prolymphocytic leukemia of T-cell type not having achieved remission             | Neoplasm |
| C91A0 | ICD-10 Diagnosis | Mature B-cell leukemia Burkitt-type not having achieved remission                | Neoplasm |
| C9131 | ICD-10 Diagnosis | Prolymphocytic leukemia of B-cell type, in remission                             | Neoplasm |
| C9161 | ICD-10 Diagnosis | Prolymphocytic leukemia of T-cell type, in remission                             | Neoplasm |
| C91A1 | ICD-10 Diagnosis | Mature B-cell leukemia Burkitt-type, in remission                                | Neoplasm |
| C9132 | ICD-10 Diagnosis | Prolymphocytic leukemia of B-cell type, in relapse                               | Neoplasm |

|       |                  |                                                                    |          |
|-------|------------------|--------------------------------------------------------------------|----------|
| C9152 | ICD-10 Diagnosis | Adult T-cell lymphoma/leukemia (HTLV-1-associated), in relapse     | Neoplasm |
| C9162 | ICD-10 Diagnosis | Prolymphocytic leukemia of T-cell type, in relapse                 | Neoplasm |
| C91A2 | ICD-10 Diagnosis | Mature B-cell leukemia Burkitt-type, in relapse                    | Neoplasm |
| C9261 | ICD-10 Diagnosis | Acute myeloid leukemia with 11q23-abnormality in remission         | Neoplasm |
| C9242 | ICD-10 Diagnosis | Acute promyelocytic leukemia, in relapse                           | Neoplasm |
| C9252 | ICD-10 Diagnosis | Acute myelomonocytic leukemia, in relapse                          | Neoplasm |
| C9262 | ICD-10 Diagnosis | Acute myeloid leukemia with 11q23-abnormality in relapse           | Neoplasm |
| C92A2 | ICD-10 Diagnosis | Acute myeloid leukemia with multilineage dysplasia, in relapse     | Neoplasm |
| C9212 | ICD-10 Diagnosis | Chronic myeloid leukemia, BCR/ABL-positive, in relapse             | Neoplasm |
| C9312 | ICD-10 Diagnosis | Chronic myelomonocytic leukemia, in relapse                        | Neoplasm |
| C93Z0 | ICD-10 Diagnosis | Other monocytic leukemia, not having achieved remission            | Neoplasm |
| C9401 | ICD-10 Diagnosis | Acute erythroid leukemia, in remission                             | Neoplasm |
| C9430 | ICD-10 Diagnosis | Mast cell leukemia not having achieved remission                   | Neoplasm |
| C9431 | ICD-10 Diagnosis | Mast cell leukemia, in remission                                   | Neoplasm |
| C9481 | ICD-10 Diagnosis | Other specified leukemias, in remission                            | Neoplasm |
| C9440 | ICD-10 Diagnosis | Acute panmyelosis with myelofibrosis not having achieved remission | Neoplasm |
| C9441 | ICD-10 Diagnosis | Acute panmyelosis with myelofibrosis, in remission                 | Neoplasm |
| C9442 | ICD-10 Diagnosis | Acute panmyelosis with myelofibrosis, in relapse                   | Neoplasm |
| C003  | ICD-10 Diagnosis | Malignant neoplasm of upper lip, inner aspect                      | Neoplasm |
| C005  | ICD-10 Diagnosis | Malignant neoplasm of lip, unspecified, inner aspect               | Neoplasm |
| C006  | ICD-10 Diagnosis | Malignant neoplasm of commissure of lip, unspecified               | Neoplasm |
| C041  | ICD-10 Diagnosis | Malignant neoplasm of lateral floor of mouth                       | Neoplasm |
| C052  | ICD-10 Diagnosis | Malignant neoplasm of uvula                                        | Neoplasm |
| C142  | ICD-10 Diagnosis | Malignant neoplasm of Waldeyer's ring                              | Neoplasm |

|       |                  |                                                                                                      |          |
|-------|------------------|------------------------------------------------------------------------------------------------------|----------|
| C173  | ICD-10 Diagnosis | Meckel's diverticulum, malignant                                                                     | Neoplasm |
| C312  | ICD-10 Diagnosis | Malignant neoplasm of frontal sinus                                                                  | Neoplasm |
| C322  | ICD-10 Diagnosis | Malignant neoplasm of subglottis                                                                     | Neoplasm |
| C462  | ICD-10 Diagnosis | Kaposi's sarcoma of palate                                                                           | Neoplasm |
| C49A0 | ICD-10 Diagnosis | Gastrointestinal stromal tumor,<br>unspecified site                                                  | Neoplasm |
| C49A1 | ICD-10 Diagnosis | Gastrointestinal stromal tumor of<br>esophagus                                                       | Neoplasm |
| C49A2 | ICD-10 Diagnosis | Gastrointestinal stromal tumor of<br>stomach                                                         | Neoplasm |
| C49A3 | ICD-10 Diagnosis | Gastrointestinal stromal tumor of small<br>intestine                                                 | Neoplasm |
| C49A4 | ICD-10 Diagnosis | Gastrointestinal stromal tumor of large<br>intestine                                                 | Neoplasm |
| C49A5 | ICD-10 Diagnosis | Gastrointestinal stromal tumor of rectum                                                             | Neoplasm |
| C49A9 | ICD-10 Diagnosis | Gastrointestinal stromal tumor of other<br>sites                                                     | Neoplasm |
| C5710 | ICD-10 Diagnosis | Malignant neoplasm of unspecified broad<br>ligament                                                  | Neoplasm |
| C5711 | ICD-10 Diagnosis | Malignant neoplasm of right broad<br>ligament                                                        | Neoplasm |
| C5712 | ICD-10 Diagnosis | Malignant neoplasm of left broad<br>ligament                                                         | Neoplasm |
| C5720 | ICD-10 Diagnosis | Malignant neoplasm of unspecified round<br>ligament                                                  | Neoplasm |
| C5721 | ICD-10 Diagnosis | Malignant neoplasm of right round<br>ligament                                                        | Neoplasm |
| C5722 | ICD-10 Diagnosis | Malignant neoplasm of left round<br>ligament                                                         | Neoplasm |
| C58   | ICD-10 Diagnosis | Malignant neoplasm of placenta                                                                       | Neoplasm |
| C600  | ICD-10 Diagnosis | Malignant neoplasm of prepuce                                                                        | Neoplasm |
| C681  | ICD-10 Diagnosis | Malignant neoplasm of paraurethral<br>glands                                                         | Neoplasm |
| C8102 | ICD-10 Diagnosis | Nodular lymphocyte predominant<br>Hodgkin lymphoma, intrathoracic lymph<br>nodes                     | Neoplasm |
| C8103 | ICD-10 Diagnosis | Nodular lymphocyte predominant<br>Hodgkin lymphoma, intra-abdominal<br>lymph nodes                   | Neoplasm |
| C8105 | ICD-10 Diagnosis | Nodular lymphocyte predominant<br>Hodgkin lymphoma, lymph nodes of<br>inguinal region and lower limb | Neoplasm |
| C8106 | ICD-10 Diagnosis | Nodular lymphocyte predominant<br>Hodgkin lymphoma, intrapelvic lymph<br>nodes                       | Neoplasm |

|       |                  |                                                                                           |          |
|-------|------------------|-------------------------------------------------------------------------------------------|----------|
| C8107 | ICD-10 Diagnosis | Nodular lymphocyte predominant<br>Hodgkin lymphoma, spleen                                | Neoplasm |
| C8115 | ICD-10 Diagnosis | Nodular sclerosis Hodgkin lymphoma,<br>lymph nodes of inguinal region and lower<br>limb   | Neoplasm |
| C8117 | ICD-10 Diagnosis | Nodular sclerosis Hodgkin lymphoma,<br>spleen                                             | Neoplasm |
| C8120 | ICD-10 Diagnosis | Mixed cellularity Hodgkin lymphoma,<br>unspecified site                                   | Neoplasm |
| C8121 | ICD-10 Diagnosis | Mixed cellularity Hodgkin lymphoma,<br>lymph nodes of head, face, and neck                | Neoplasm |
| C8122 | ICD-10 Diagnosis | Mixed cellularity Hodgkin lymphoma,<br>intrathoracic lymph nodes                          | Neoplasm |
| C8123 | ICD-10 Diagnosis | Mixed cellularity Hodgkin lymphoma,<br>intra-abdominal lymph nodes                        | Neoplasm |
| C8124 | ICD-10 Diagnosis | Mixed cellularity Hodgkin lymphoma,<br>lymph nodes of axilla and upper limb               | Neoplasm |
| C8125 | ICD-10 Diagnosis | Mixed cellularity Hodgkin lymphoma,<br>lymph nodes of inguinal region and lower<br>limb   | Neoplasm |
| C8126 | ICD-10 Diagnosis | Mixed cellularity Hodgkin lymphoma,<br>intrapelvic lymph nodes                            | Neoplasm |
| C8127 | ICD-10 Diagnosis | Mixed cellularity Hodgkin lymphoma,<br>spleen                                             | Neoplasm |
| C8129 | ICD-10 Diagnosis | Mixed cellularity Hodgkin lymphoma,<br>extranodal and solid organ sites                   | Neoplasm |
| C8131 | ICD-10 Diagnosis | Lymphocyte depleted Hodgkin<br>lymphoma, lymph nodes of head, face,<br>and neck           | Neoplasm |
| C8132 | ICD-10 Diagnosis | Lymphocyte depleted Hodgkin<br>lymphoma, intrathoracic lymph nodes                        | Neoplasm |
| C8133 | ICD-10 Diagnosis | Lymphocyte depleted Hodgkin<br>lymphoma, intra-abdominal lymph nodes                      | Neoplasm |
| C8134 | ICD-10 Diagnosis | Lymphocyte depleted Hodgkin<br>lymphoma, lymph nodes of axilla and<br>upper limb          | Neoplasm |
| C8135 | ICD-10 Diagnosis | Lymphocyte depleted Hodgkin<br>lymphoma, lymph nodes of inguinal<br>region and lower limb | Neoplasm |

|       |                  |                                                                                 |          |
|-------|------------------|---------------------------------------------------------------------------------|----------|
| C8136 | ICD-10 Diagnosis | Lymphocyte depleted Hodgkin lymphoma, intrapelvic lymph nodes                   | Neoplasm |
| C8137 | ICD-10 Diagnosis | Lymphocyte depleted Hodgkin lymphoma, spleen                                    | Neoplasm |
| C8142 | ICD-10 Diagnosis | Lymphocyte-rich Hodgkin lymphoma, intrathoracic lymph nodes                     | Neoplasm |
| C8143 | ICD-10 Diagnosis | Lymphocyte-rich Hodgkin lymphoma, intra-abdominal lymph nodes                   | Neoplasm |
| C8145 | ICD-10 Diagnosis | Lymphocyte-rich Hodgkin lymphoma, lymph nodes of inguinal region and lower limb | Neoplasm |
| C8146 | ICD-10 Diagnosis | Lymphocyte-rich Hodgkin lymphoma, intrapelvic lymph nodes                       | Neoplasm |
| C8147 | ICD-10 Diagnosis | Lymphocyte-rich Hodgkin lymphoma, spleen                                        | Neoplasm |
| C8172 | ICD-10 Diagnosis | Other Hodgkin lymphoma, intrathoracic lymph nodes                               | Neoplasm |
| C8173 | ICD-10 Diagnosis | Other Hodgkin lymphoma, intra-abdominal lymph nodes                             | Neoplasm |
| C8174 | ICD-10 Diagnosis | Other Hodgkin lymphoma, lymph nodes of axilla and upper limb                    | Neoplasm |
| C8175 | ICD-10 Diagnosis | Other Hodgkin lymphoma, lymph nodes of inguinal region and lower limb           | Neoplasm |
| C8176 | ICD-10 Diagnosis | Other Hodgkin lymphoma, intrapelvic lymph nodes                                 | Neoplasm |
| C8177 | ICD-10 Diagnosis | Other Hodgkin lymphoma, spleen                                                  | Neoplasm |
| C8178 | ICD-10 Diagnosis | Other Hodgkin lymphoma, lymph nodes of multiple sites                           | Neoplasm |
| C8195 | ICD-10 Diagnosis | Hodgkin lymphoma, unspecified, lymph nodes of inguinal region and lower limb    | Neoplasm |
| C8197 | ICD-10 Diagnosis | Hodgkin lymphoma, unspecified, spleen                                           | Neoplasm |
| C8207 | ICD-10 Diagnosis | Follicular lymphoma grade I, spleen                                             | Neoplasm |
| C8217 | ICD-10 Diagnosis | Follicular lymphoma grade II, spleen                                            | Neoplasm |
| C8227 | ICD-10 Diagnosis | Follicular lymphoma grade III, unspecified, spleen                              | Neoplasm |
| C8237 | ICD-10 Diagnosis | Follicular lymphoma grade IIIa, spleen                                          | Neoplasm |
| C8247 | ICD-10 Diagnosis | Follicular lymphoma grade IIIb, spleen                                          | Neoplasm |
| C8267 | ICD-10 Diagnosis | Cutaneous follicle center lymphoma, spleen                                      | Neoplasm |

|       |                  |                                                                                           |          |
|-------|------------------|-------------------------------------------------------------------------------------------|----------|
| C8287 | ICD-10 Diagnosis | Other types of follicular lymphoma, spleen                                                | Neoplasm |
| C8297 | ICD-10 Diagnosis | Follicular lymphoma, unspecified, spleen                                                  | Neoplasm |
| C8302 | ICD-10 Diagnosis | Small cell B-cell lymphoma, intrathoracic lymph nodes                                     | Neoplasm |
| C8312 | ICD-10 Diagnosis | Mantle cell lymphoma, intrathoracic lymph nodes                                           | Neoplasm |
| C8357 | ICD-10 Diagnosis | Lymphoblastic (diffuse) lymphoma, spleen                                                  | Neoplasm |
| C8375 | ICD-10 Diagnosis | Burkitt lymphoma, lymph nodes of inguinal region and lower limb                           | Neoplasm |
| C8377 | ICD-10 Diagnosis | Burkitt lymphoma, spleen                                                                  | Neoplasm |
| C8392 | ICD-10 Diagnosis | Non-follicular (diffuse) lymphoma, unspecified, intrathoracic lymph nodes                 | Neoplasm |
| C8402 | ICD-10 Diagnosis | Mycosis fungoides, intrathoracic lymph nodes                                              | Neoplasm |
| C8411 | ICD-10 Diagnosis | Sezary disease, lymph nodes of head, face, and neck                                       | Neoplasm |
| C8412 | ICD-10 Diagnosis | Sezary disease, intrathoracic lymph nodes                                                 | Neoplasm |
| C8413 | ICD-10 Diagnosis | Sezary disease, intra-abdominal lymph nodes                                               | Neoplasm |
| C8414 | ICD-10 Diagnosis | Sezary disease, lymph nodes of axilla and upper limb                                      | Neoplasm |
| C8416 | ICD-10 Diagnosis | Sezary disease, intrapelvic lymph nodes                                                   | Neoplasm |
| C8417 | ICD-10 Diagnosis | Sezary disease, spleen                                                                    | Neoplasm |
| C8418 | ICD-10 Diagnosis | Sezary disease, lymph nodes of multiple sites                                             | Neoplasm |
| C8443 | ICD-10 Diagnosis | Peripheral T-cell lymphoma, not classified, intra-abdominal lymph nodes                   | Neoplasm |
| C8445 | ICD-10 Diagnosis | Peripheral T-cell lymphoma, not classified, lymph nodes of inguinal region and lower limb | Neoplasm |
| C8446 | ICD-10 Diagnosis | Peripheral T-cell lymphoma, not classified, intrapelvic lymph nodes                       | Neoplasm |
| C8447 | ICD-10 Diagnosis | Peripheral T-cell lymphoma, not classified, spleen                                        | Neoplasm |
| C8467 | ICD-10 Diagnosis | Anaplastic large cell lymphoma, ALK-positive, spleen                                      | Neoplasm |
| C8477 | ICD-10 Diagnosis | Anaplastic large cell lymphoma, ALK-negative, spleen                                      | Neoplasm |
| C9221 | ICD-10 Diagnosis | Atypical chronic myeloid leukemia, BCR/ABL-negative, in remission                         | Neoplasm |



|       |                  |                                                                                 |          |
|-------|------------------|---------------------------------------------------------------------------------|----------|
| C9222 | ICD-10 Diagnosis | Atypical chronic myeloid leukemia, BCR/ABL-negative, in relapse                 | Neoplasm |
| C9222 | ICD-10 Diagnosis | Other myeloid leukemia, in relapse                                              | Neoplasm |
| C9302 | ICD-10 Diagnosis | Acute monoblastic/monocytic leukemia, in relapse                                | Neoplasm |
| C9331 | ICD-10 Diagnosis | Juvenile myelomonocytic leukemia, in remission                                  | Neoplasm |
| C9332 | ICD-10 Diagnosis | Juvenile myelomonocytic leukemia, in relapse                                    | Neoplasm |
| C93Z1 | ICD-10 Diagnosis | Other monocytic leukemia, in remission                                          | Neoplasm |
| C93Z2 | ICD-10 Diagnosis | Other monocytic leukemia, in relapse                                            | Neoplasm |
| C9391 | ICD-10 Diagnosis | Monocytic leukemia, unspecified in remission                                    | Neoplasm |
| C9392 | ICD-10 Diagnosis | Monocytic leukemia, unspecified in relapse                                      | Neoplasm |
| C9402 | ICD-10 Diagnosis | Acute erythroid leukemia, in relapse                                            | Neoplasm |
| C9420 | ICD-10 Diagnosis | Acute megakaryoblastic leukemia not having achieved remission                   | Neoplasm |
| C9422 | ICD-10 Diagnosis | Acute megakaryoblastic leukemia, in relapse                                     | Neoplasm |
| C9432 | ICD-10 Diagnosis | Mast cell leukemia, in relapse                                                  | Neoplasm |
| C9482 | ICD-10 Diagnosis | Other specified leukemias, in relapse                                           | Neoplasm |
| C00   | ICD-10 Diagnosis | Malignant neoplasm of lip                                                       | Neoplasm |
| C02   | ICD-10 Diagnosis | Malignant neoplasm of other and unspecified parts of tongue                     | Neoplasm |
| C03   | ICD-10 Diagnosis | Malignant neoplasm of gum                                                       | Neoplasm |
| C04   | ICD-10 Diagnosis | Malignant neoplasm of floor of mouth                                            | Neoplasm |
| C05   | ICD-10 Diagnosis | Malignant neoplasm of palate                                                    | Neoplasm |
| C06   | ICD-10 Diagnosis | Malignant neoplasm of other and unspecified parts of mouth                      | Neoplasm |
| C068  | ICD-10 Diagnosis | Malignant neoplasm of overlapping sites of other and unspecified parts of mouth | Neoplasm |
| C08   | ICD-10 Diagnosis | Malignant neoplasm of other and unspecified major salivary glands               | Neoplasm |
| C09   | ICD-10 Diagnosis | Malignant neoplasm of tonsil                                                    | Neoplasm |
| C10   | ICD-10 Diagnosis | Malignant neoplasm of oropharynx                                                | Neoplasm |
| C11   | ICD-10 Diagnosis | Malignant neoplasm of nasopharynx                                               | Neoplasm |
| C13   | ICD-10 Diagnosis | Malignant neoplasm of hypopharynx                                               | Neoplasm |

|      |                  |                                                                                                      |          |
|------|------------------|------------------------------------------------------------------------------------------------------|----------|
|      |                  | Malignant neoplasm of other and ill-defined sites in the lip, oral cavity and pharynx                | Neoplasm |
| C14  | ICD-10 Diagnosis |                                                                                                      |          |
| C15  | ICD-10 Diagnosis | Malignant neoplasm of esophagus                                                                      | Neoplasm |
| C16  | ICD-10 Diagnosis | Malignant neoplasm of stomach                                                                        | Neoplasm |
| C17  | ICD-10 Diagnosis | Malignant neoplasm of small intestine                                                                | Neoplasm |
| C18  | ICD-10 Diagnosis | Malignant neoplasm of colon                                                                          | Neoplasm |
| C21  | ICD-10 Diagnosis | Malignant neoplasm of anus and anal canal                                                            | Neoplasm |
| C22  | ICD-10 Diagnosis | Malignant neoplasm of liver and intrahepatic bile ducts                                              | Neoplasm |
| C24  | ICD-10 Diagnosis | Malignant neoplasm of other and unspecified parts of biliary tract                                   | Neoplasm |
| C25  | ICD-10 Diagnosis | Malignant neoplasm of pancreas                                                                       | Neoplasm |
| C26  | ICD-10 Diagnosis | Malignant neoplasm of other and ill-defined digestive organs                                         | Neoplasm |
| C30  | ICD-10 Diagnosis | Malignant neoplasm of nasal cavity and middle ear                                                    | Neoplasm |
| C31  | ICD-10 Diagnosis | Malignant neoplasm of accessory sinuses                                                              | Neoplasm |
| C32  | ICD-10 Diagnosis | Malignant neoplasm of larynx                                                                         | Neoplasm |
| C34  | ICD-10 Diagnosis | Malignant neoplasm of bronchus and lung                                                              | Neoplasm |
| C340 | ICD-10 Diagnosis | Malignant neoplasm of main bronchus                                                                  | Neoplasm |
| C341 | ICD-10 Diagnosis | Malignant neoplasm of upper lobe, bronchus or lung                                                   | Neoplasm |
| C343 | ICD-10 Diagnosis | Malignant neoplasm of lower lobe, bronchus or lung                                                   | Neoplasm |
| C348 | ICD-10 Diagnosis | Malignant neoplasm of overlapping sites of bronchus and lung                                         | Neoplasm |
| C349 | ICD-10 Diagnosis | Malignant neoplasm of unspecified part of bronchus or lung                                           | Neoplasm |
| C38  | ICD-10 Diagnosis | Malignant neoplasm of heart, mediastinum and pleura                                                  | Neoplasm |
| C39  | ICD-10 Diagnosis | Malignant neoplasm of other and ill-defined sites in the respiratory system and intrathoracic organs | Neoplasm |
| C40  | ICD-10 Diagnosis | Malignant neoplasm of bone and articular cartilage of limbs                                          | Neoplasm |
| C400 | ICD-10 Diagnosis | Malignant neoplasm of scapula and long bones of upper limb                                           | Neoplasm |
| C401 | ICD-10 Diagnosis | Malignant neoplasm of short bones of upper limb                                                      | Neoplasm |
| C402 | ICD-10 Diagnosis | Malignant neoplasm of long bones of lower limb                                                       | Neoplasm |

|      |                  |                                                                                    |          |
|------|------------------|------------------------------------------------------------------------------------|----------|
| C403 | ICD-10 Diagnosis | Malignant neoplasm of short bones of lower limb                                    | Neoplasm |
| C408 | ICD-10 Diagnosis | Malignant neoplasm of overlapping sites of bone and articular cartilage of limb    | Neoplasm |
| C409 | ICD-10 Diagnosis | Malignant neoplasm of unspecified bones and articular cartilage of limb            | Neoplasm |
| C41  | ICD-10 Diagnosis | Malignant neoplasm of bone and articular cartilage of other and unspecified sites  | Neoplasm |
| C43  | ICD-10 Diagnosis | Malignant melanoma of skin                                                         | Neoplasm |
| C431 | ICD-10 Diagnosis | Malignant melanoma of eyelid, including canthus                                    | Neoplasm |
| C432 | ICD-10 Diagnosis | Malignant melanoma of ear and external auricular canal                             | Neoplasm |
| C433 | ICD-10 Diagnosis | Malignant melanoma of other and unspecified parts of face                          | Neoplasm |
| C435 | ICD-10 Diagnosis | Malignant melanoma of trunk                                                        | Neoplasm |
| C436 | ICD-10 Diagnosis | Malignant melanoma of upper limb, including shoulder                               | Neoplasm |
| C437 | ICD-10 Diagnosis | Malignant melanoma of lower limb, including hip                                    | Neoplasm |
| C45  | ICD-10 Diagnosis | Mesothelioma                                                                       | Neoplasm |
| C46  | ICD-10 Diagnosis | Kaposi's sarcoma                                                                   | Neoplasm |
| C465 | ICD-10 Diagnosis | Kaposi's sarcoma of lung                                                           | Neoplasm |
| C47  | ICD-10 Diagnosis | Malignant neoplasm of peripheral nerves and autonomic nervous system               | Neoplasm |
| C471 | ICD-10 Diagnosis | Malignant neoplasm of peripheral nerves of upper limb, including shoulder          | Neoplasm |
| C472 | ICD-10 Diagnosis | Malignant neoplasm of peripheral nerves of lower limb, including hip               | Neoplasm |
| C48  | ICD-10 Diagnosis | Malignant neoplasm of retroperitoneum and peritoneum                               | Neoplasm |
| C49  | ICD-10 Diagnosis | Malignant neoplasm of other connective and soft tissue                             | Neoplasm |
| C491 | ICD-10 Diagnosis | Malignant neoplasm of connective and soft tissue of upper limb, including shoulder | Neoplasm |
| C492 | ICD-10 Diagnosis | Malignant neoplasm of connective and soft tissue of lower limb, including hip      | Neoplasm |
| C49A | ICD-10 Diagnosis | Gastrointestinal stromal tumor                                                     | Neoplasm |
| C50  | ICD-10 Diagnosis | Malignant neoplasm of breast                                                       | Neoplasm |
| C500 | ICD-10 Diagnosis | Malignant neoplasm of nipple and areola                                            | Neoplasm |

|       |                  |                                                                   |          |
|-------|------------------|-------------------------------------------------------------------|----------|
| C5001 | ICD-10 Diagnosis | Malignant neoplasm of nipple and areola, female                   | Neoplasm |
| C5002 | ICD-10 Diagnosis | Malignant neoplasm of nipple and areola, male                     | Neoplasm |
| C501  | ICD-10 Diagnosis | Malignant neoplasm of central portion of breast                   | Neoplasm |
| C5011 | ICD-10 Diagnosis | Malignant neoplasm of central portion of breast, female           | Neoplasm |
| C5012 | ICD-10 Diagnosis | Malignant neoplasm of central portion of breast, male             | Neoplasm |
| C502  | ICD-10 Diagnosis | Malignant neoplasm of upper-inner quadrant of breast              | Neoplasm |
| C5021 | ICD-10 Diagnosis | Malignant neoplasm of upper-inner quadrant of breast, female      | Neoplasm |
| C5022 | ICD-10 Diagnosis | Malignant neoplasm of upper-inner quadrant of breast, male        | Neoplasm |
| C503  | ICD-10 Diagnosis | Malignant neoplasm of lower-inner quadrant of breast              | Neoplasm |
| C5032 | ICD-10 Diagnosis | Malignant neoplasm of lower-inner quadrant of breast, male        | Neoplasm |
| C504  | ICD-10 Diagnosis | Malignant neoplasm of upper-outer quadrant of breast              | Neoplasm |
| C5042 | ICD-10 Diagnosis | Malignant neoplasm of upper-outer quadrant of breast, male        | Neoplasm |
| C505  | ICD-10 Diagnosis | Malignant neoplasm of lower-outer quadrant of breast              | Neoplasm |
| C5052 | ICD-10 Diagnosis | Malignant neoplasm of lower-outer quadrant of breast, male        | Neoplasm |
| C506  | ICD-10 Diagnosis | Malignant neoplasm of axillary tail of breast                     | Neoplasm |
| C5062 | ICD-10 Diagnosis | Malignant neoplasm of axillary tail of breast, male               | Neoplasm |
| C508  | ICD-10 Diagnosis | Malignant neoplasm of overlapping sites of breast                 | Neoplasm |
| C5081 | ICD-10 Diagnosis | Malignant neoplasm of overlapping sites of breast, female         | Neoplasm |
| C5082 | ICD-10 Diagnosis | Malignant neoplasm of overlapping sites of breast, male           | Neoplasm |
| C509  | ICD-10 Diagnosis | Malignant neoplasm of breast of unspecified site                  | Neoplasm |
| C51   | ICD-10 Diagnosis | Malignant neoplasm of vulva                                       | Neoplasm |
| C53   | ICD-10 Diagnosis | Malignant neoplasm of cervix uteri                                | Neoplasm |
| C54   | ICD-10 Diagnosis | Malignant neoplasm of corpus uteri                                | Neoplasm |
| C56   | ICD-10 Diagnosis | Malignant neoplasm of ovary                                       | Neoplasm |
| C57   | ICD-10 Diagnosis | Malignant neoplasm of other and unspecified female genital organs | Neoplasm |

|      |                  |                                                                                             |          |
|------|------------------|---------------------------------------------------------------------------------------------|----------|
| C570 | ICD-10 Diagnosis | Malignant neoplasm of fallopian tube                                                        | Neoplasm |
| C571 | ICD-10 Diagnosis | Malignant neoplasm of broad ligament                                                        | Neoplasm |
| C572 | ICD-10 Diagnosis | Malignant neoplasm of round ligament                                                        | Neoplasm |
| C60  | ICD-10 Diagnosis | Malignant neoplasm of penis                                                                 | Neoplasm |
| C62  | ICD-10 Diagnosis | Malignant neoplasm of testis                                                                | Neoplasm |
| C620 | ICD-10 Diagnosis | Malignant neoplasm of undescended testis                                                    | Neoplasm |
| C621 | ICD-10 Diagnosis | Malignant neoplasm of descended testis                                                      | Neoplasm |
| C629 | ICD-10 Diagnosis | Malignant neoplasm of testis, unspecified whether descended or undescended                  | Neoplasm |
| C63  | ICD-10 Diagnosis | Malignant neoplasm of other and unspecified male genital organs                             | Neoplasm |
| C630 | ICD-10 Diagnosis | Malignant neoplasm of epididymis                                                            | Neoplasm |
| C631 | ICD-10 Diagnosis | Malignant neoplasm of spermatic cord                                                        | Neoplasm |
| C64  | ICD-10 Diagnosis | Malignant neoplasm of kidney, except renal pelvis                                           | Neoplasm |
| C65  | ICD-10 Diagnosis | Malignant neoplasm of renal pelvis                                                          | Neoplasm |
| C66  | ICD-10 Diagnosis | Malignant neoplasm of ureter                                                                | Neoplasm |
| C67  | ICD-10 Diagnosis | Malignant neoplasm of bladder                                                               | Neoplasm |
| C68  | ICD-10 Diagnosis | Malignant neoplasm of other and unspecified urinary organs                                  | Neoplasm |
| C69  | ICD-10 Diagnosis | Malignant neoplasm of eye and adnexa                                                        | Neoplasm |
| C690 | ICD-10 Diagnosis | Malignant neoplasm of conjunctiva                                                           | Neoplasm |
| C691 | ICD-10 Diagnosis | Malignant neoplasm of cornea                                                                | Neoplasm |
| C692 | ICD-10 Diagnosis | Malignant neoplasm of retina                                                                | Neoplasm |
| C693 | ICD-10 Diagnosis | Malignant neoplasm of choroid                                                               | Neoplasm |
| C694 | ICD-10 Diagnosis | Malignant neoplasm of ciliary body                                                          | Neoplasm |
| C695 | ICD-10 Diagnosis | Malignant neoplasm of lacrimal gland and duct                                               | Neoplasm |
| C696 | ICD-10 Diagnosis | Malignant neoplasm of orbit                                                                 | Neoplasm |
| C698 | ICD-10 Diagnosis | Malignant neoplasm of overlapping sites of eye and adnexa                                   | Neoplasm |
| C699 | ICD-10 Diagnosis | Malignant neoplasm of unspecified site of eye                                               | Neoplasm |
| C70  | ICD-10 Diagnosis | Malignant neoplasm of meninges                                                              | Neoplasm |
| C71  | ICD-10 Diagnosis | Malignant neoplasm of brain                                                                 | Neoplasm |
| C72  | ICD-10 Diagnosis | Malignant neoplasm of spinal cord, cranial nerves and other parts of central nervous system | Neoplasm |

|      |                  |                                                                     |          |
|------|------------------|---------------------------------------------------------------------|----------|
| C722 | ICD-10 Diagnosis | Malignant neoplasm of olfactory nerve                               | Neoplasm |
| C723 | ICD-10 Diagnosis | Malignant neoplasm of optic nerve                                   | Neoplasm |
| C724 | ICD-10 Diagnosis | Malignant neoplasm of acoustic nerve                                | Neoplasm |
| C725 | ICD-10 Diagnosis | Malignant neoplasm of other and unspecified cranial nerves          | Neoplasm |
| C74  | ICD-10 Diagnosis | Malignant neoplasm of adrenal gland                                 | Neoplasm |
| C740 | ICD-10 Diagnosis | Malignant neoplasm of cortex of adrenal gland                       | Neoplasm |
| C741 | ICD-10 Diagnosis | Malignant neoplasm of medulla of adrenal gland                      | Neoplasm |
| C749 | ICD-10 Diagnosis | Malignant neoplasm of unspecified part of adrenal gland             | Neoplasm |
| C75  | ICD-10 Diagnosis | Malignant neoplasm of other endocrine glands and related structures | Neoplasm |
| C76  | ICD-10 Diagnosis | Malignant neoplasm of other and ill-defined sites                   | Neoplasm |
| C764 | ICD-10 Diagnosis | Malignant neoplasm of upper limb                                    | Neoplasm |
| C765 | ICD-10 Diagnosis | Malignant neoplasm of lower limb                                    | Neoplasm |
| C81  | ICD-10 Diagnosis | Hodgkin lymphoma                                                    | Neoplasm |
| C810 | ICD-10 Diagnosis | Nodular lymphocyte predominant Hodgkin lymphoma                     | Neoplasm |
| C811 | ICD-10 Diagnosis | Nodular sclerosis Hodgkin lymphoma                                  | Neoplasm |
| C812 | ICD-10 Diagnosis | Mixed cellularity Hodgkin lymphoma                                  | Neoplasm |
| C813 | ICD-10 Diagnosis | Lymphocyte depleted Hodgkin lymphoma                                | Neoplasm |
| C814 | ICD-10 Diagnosis | Lymphocyte-rich Hodgkin lymphoma                                    | Neoplasm |
| C817 | ICD-10 Diagnosis | Other Hodgkin lymphoma                                              | Neoplasm |
| C819 | ICD-10 Diagnosis | Hodgkin lymphoma, unspecified                                       | Neoplasm |
| C82  | ICD-10 Diagnosis | Follicular lymphoma                                                 | Neoplasm |
| C820 | ICD-10 Diagnosis | Follicular lymphoma grade I                                         | Neoplasm |
| C821 | ICD-10 Diagnosis | Follicular lymphoma grade II                                        | Neoplasm |
| C822 | ICD-10 Diagnosis | Follicular lymphoma grade III, unspecified                          | Neoplasm |
| C823 | ICD-10 Diagnosis | Follicular lymphoma grade IIIa                                      | Neoplasm |
| C824 | ICD-10 Diagnosis | Follicular lymphoma grade IIIb                                      | Neoplasm |
| C825 | ICD-10 Diagnosis | Diffuse follicle center lymphoma                                    | Neoplasm |
| C826 | ICD-10 Diagnosis | Cutaneous follicle center lymphoma                                  | Neoplasm |
| C828 | ICD-10 Diagnosis | Other types of follicular lymphoma                                  | Neoplasm |
| C829 | ICD-10 Diagnosis | Follicular lymphoma, unspecified                                    | Neoplasm |
| C83  | ICD-10 Diagnosis | Non-follicular lymphoma                                             | Neoplasm |

|      |                  |                                            |          |
|------|------------------|--------------------------------------------|----------|
| C830 | ICD-10 Diagnosis | Small cell B-cell lymphoma                 | Neoplasm |
| C831 | ICD-10 Diagnosis | Mantle cell lymphoma                       | Neoplasm |
| C833 | ICD-10 Diagnosis | Diffuse large B-cell lymphoma              | Neoplasm |
| C835 | ICD-10 Diagnosis | Lymphoblastic (diffuse) lymphoma           | Neoplasm |
| C837 | ICD-10 Diagnosis | Burkitt lymphoma                           | Neoplasm |
| C838 | ICD-10 Diagnosis | Other non-follicular lymphoma              | Neoplasm |
|      |                  | Non-follicular (diffuse) lymphoma,         |          |
| C839 | ICD-10 Diagnosis | unspecified                                | Neoplasm |
| C84  | ICD-10 Diagnosis | Mature T/NK-cell lymphomas                 | Neoplasm |
| C840 | ICD-10 Diagnosis | Mycosis fungoides                          | Neoplasm |
| C841 | ICD-10 Diagnosis | Sezary disease                             | Neoplasm |
| C844 | ICD-10 Diagnosis | Peripheral T-cell lymphoma, not classified | Neoplasm |
|      |                  | Anaplastic large cell lymphoma, ALK-       |          |
| C846 | ICD-10 Diagnosis | positive                                   | Neoplasm |
|      |                  | Anaplastic large cell lymphoma, ALK-       |          |
| C847 | ICD-10 Diagnosis | negative                                   | Neoplasm |
| C84A | ICD-10 Diagnosis | Cutaneous T-cell lymphoma, unspecified     | Neoplasm |
| C84Z | ICD-10 Diagnosis | Other mature T/NK-cell lymphomas           | Neoplasm |
|      |                  | Mature T/NK-cell lymphomas,                |          |
| C849 | ICD-10 Diagnosis | unspecified                                | Neoplasm |
|      |                  | Other specified and unspecified types of   |          |
| C85  | ICD-10 Diagnosis | non-Hodgkin lymphoma                       | Neoplasm |
| C851 | ICD-10 Diagnosis | Unspecified B-cell lymphoma                | Neoplasm |
|      |                  | Mediastinal (thymic) large B-cell          |          |
| C852 | ICD-10 Diagnosis | lymphoma                                   | Neoplasm |
|      |                  | Other specified types of non-Hodgkin       |          |
| C858 | ICD-10 Diagnosis | lymphoma                                   | Neoplasm |
| C859 | ICD-10 Diagnosis | Non-Hodgkin lymphoma, unspecified          | Neoplasm |
|      |                  | Malignant immunoproliferative diseases     |          |
| C88  | ICD-10 Diagnosis | and certain other B-cell lymphomas         | Neoplasm |
|      |                  | Multiple myeloma and malignant plasma      |          |
| C90  | ICD-10 Diagnosis | cell neoplasms                             | Neoplasm |
| C900 | ICD-10 Diagnosis | Multiple myeloma                           | Neoplasm |
| C901 | ICD-10 Diagnosis | Plasma cell leukemia                       | Neoplasm |
| C902 | ICD-10 Diagnosis | Extramedullary plasmacytoma                | Neoplasm |
| C903 | ICD-10 Diagnosis | Solitary plasmacytoma                      | Neoplasm |
| C91  | ICD-10 Diagnosis | Lymphoid leukemia                          | Neoplasm |
| C910 | ICD-10 Diagnosis | Acute lymphoblastic leukemia [ALL]         | Neoplasm |
|      |                  | Chronic lymphocytic leukemia of B-cell     |          |
| C911 | ICD-10 Diagnosis | type                                       | Neoplasm |
| C913 | ICD-10 Diagnosis | Prolymphocytic leukemia of B-cell type     | Neoplasm |
| C914 | ICD-10 Diagnosis | Hairy cell leukemia                        | Neoplasm |

|      |                  |                                                                                         |          |
|------|------------------|-----------------------------------------------------------------------------------------|----------|
| C915 | ICD-10 Diagnosis | Adult T-cell lymphoma/leukemia (HTLV-1-associated)                                      | Neoplasm |
| C916 | ICD-10 Diagnosis | Prolymphocytic leukemia of T-cell type                                                  | Neoplasm |
| C91A | ICD-10 Diagnosis | Mature B-cell leukemia Burkitt-type                                                     | Neoplasm |
| C91Z | ICD-10 Diagnosis | Other lymphoid leukemia                                                                 | Neoplasm |
| C919 | ICD-10 Diagnosis | Lymphoid leukemia, unspecified                                                          | Neoplasm |
| C92  | ICD-10 Diagnosis | Myeloid leukemia                                                                        | Neoplasm |
| C920 | ICD-10 Diagnosis | Acute myeloblastic leukemia                                                             | Neoplasm |
| C921 | ICD-10 Diagnosis | Chronic myeloid leukemia, BCR/ABL-positive                                              | Neoplasm |
| C922 | ICD-10 Diagnosis | Atypical chronic myeloid leukemia, BCR/ABL-negative                                     | Neoplasm |
| C923 | ICD-10 Diagnosis | Myeloid sarcoma                                                                         | Neoplasm |
| C924 | ICD-10 Diagnosis | Acute promyelocytic leukemia                                                            | Neoplasm |
| C925 | ICD-10 Diagnosis | Acute myelomonocytic leukemia                                                           | Neoplasm |
| C926 | ICD-10 Diagnosis | Acute myeloid leukemia with 11q23-abnormality                                           | Neoplasm |
| C92A | ICD-10 Diagnosis | Acute myeloid leukemia with multilineage dysplasia                                      | Neoplasm |
| C92Z | ICD-10 Diagnosis | Other myeloid leukemia                                                                  | Neoplasm |
| C929 | ICD-10 Diagnosis | Myeloid leukemia, unspecified                                                           | Neoplasm |
| C93  | ICD-10 Diagnosis | Monocytic leukemia                                                                      | Neoplasm |
| C930 | ICD-10 Diagnosis | Acute monoblastic/monocytic leukemia                                                    | Neoplasm |
| C931 | ICD-10 Diagnosis | Chronic myelomonocytic leukemia                                                         | Neoplasm |
| C933 | ICD-10 Diagnosis | Juvenile myelomonocytic leukemia                                                        | Neoplasm |
| C93Z | ICD-10 Diagnosis | Other monocytic leukemia                                                                | Neoplasm |
| C939 | ICD-10 Diagnosis | Monocytic leukemia, unspecified                                                         | Neoplasm |
| C94  | ICD-10 Diagnosis | Other leukemias of specified cell type                                                  | Neoplasm |
| C940 | ICD-10 Diagnosis | Acute erythroid leukemia                                                                | Neoplasm |
| C942 | ICD-10 Diagnosis | Acute megakaryoblastic leukemia                                                         | Neoplasm |
| C943 | ICD-10 Diagnosis | Mast cell leukemia                                                                      | Neoplasm |
| C944 | ICD-10 Diagnosis | Acute panmyelosis with myelofibrosis                                                    | Neoplasm |
| C948 | ICD-10 Diagnosis | Other specified leukemias                                                               | Neoplasm |
| C95  | ICD-10 Diagnosis | Leukemia of unspecified cell type                                                       | Neoplasm |
| C950 | ICD-10 Diagnosis | Acute leukemia of unspecified cell type                                                 | Neoplasm |
| C951 | ICD-10 Diagnosis | Chronic leukemia of unspecified cell type                                               | Neoplasm |
| C959 | ICD-10 Diagnosis | Leukemia, unspecified                                                                   | Neoplasm |
| C96  | ICD-10 Diagnosis | Other and unspecified malignant neoplasms of lymphoid, hematopoietic and related tissue | Neoplasm |



|       |                  |                                                                                     |          |
|-------|------------------|-------------------------------------------------------------------------------------|----------|
| C9620 | ICD-10 Diagnosis | Malignant mast cell neoplasm, unspecified                                           | Neoplasm |
| C9621 | ICD-10 Diagnosis | Aggressive systemic mastocytosis                                                    | Neoplasm |
| C9622 | ICD-10 Diagnosis | Mast cell sarcoma                                                                   | Neoplasm |
| C9629 | ICD-10 Diagnosis | Other malignant mast cell neoplasm                                                  | Neoplasm |
| C770  | ICD-10 Diagnosis | Secondary and unspecified malignant neoplasm of lymph nodes of head, face and neck  | Neoplasm |
| C771  | ICD-10 Diagnosis | Secondary and unspecified malignant neoplasm of intrathoracic lymph nodes           | Neoplasm |
| C772  | ICD-10 Diagnosis | Secondary and unspecified malignant neoplasm of intra-abdominal lymph nodes         | Neoplasm |
| C773  | ICD-10 Diagnosis | Secondary and unspecified malignant neoplasm of axilla and upper limb lymph nodes   | Neoplasm |
| C774  | ICD-10 Diagnosis | Secondary and unspecified malignant neoplasm of inguinal and lower limb lymph nodes | Neoplasm |
| C775  | ICD-10 Diagnosis | Secondary and unspecified malignant neoplasm of intrapelvic lymph nodes             | Neoplasm |
| C778  | ICD-10 Diagnosis | Secondary and unspecified malignant neoplasm of lymph nodes of multiple regions     | Neoplasm |
| C779  | ICD-10 Diagnosis | Secondary and unspecified malignant neoplasm of lymph node, unspecified             | Neoplasm |
| C7800 | ICD-10 Diagnosis | Secondary malignant neoplasm of unspecified lung                                    | Neoplasm |
| C7801 | ICD-10 Diagnosis | Secondary malignant neoplasm of right lung                                          | Neoplasm |
| C7802 | ICD-10 Diagnosis | Secondary malignant neoplasm of left lung                                           | Neoplasm |
| C781  | ICD-10 Diagnosis | Secondary malignant neoplasm of mediastinum                                         | Neoplasm |
| C782  | ICD-10 Diagnosis | Secondary malignant neoplasm of pleura                                              | Neoplasm |
| C7830 | ICD-10 Diagnosis | Secondary malignant neoplasm of unspecified respiratory organ                       | Neoplasm |
| C7839 | ICD-10 Diagnosis | Secondary malignant neoplasm of other respiratory organs                            | Neoplasm |
| C784  | ICD-10 Diagnosis | Secondary malignant neoplasm of small intestine                                     | Neoplasm |
| C785  | ICD-10 Diagnosis | Secondary malignant neoplasm of large intestine and rectum                          | Neoplasm |

|       |                  |                                                                     |          |
|-------|------------------|---------------------------------------------------------------------|----------|
| C786  | ICD-10 Diagnosis | Secondary malignant neoplasm of retroperitoneum and peritoneum      | Neoplasm |
| C787  | ICD-10 Diagnosis | Secondary malignant neoplasm of liver and intrahepatic bile duct    | Neoplasm |
| C7880 | ICD-10 Diagnosis | Secondary malignant neoplasm of unspecified digestive organ         | Neoplasm |
| C7889 | ICD-10 Diagnosis | Secondary malignant neoplasm of other digestive organs              | Neoplasm |
| C7900 | ICD-10 Diagnosis | Secondary malignant neoplasm of unspecified kidney and renal pelvis | Neoplasm |
| C7901 | ICD-10 Diagnosis | Secondary malignant neoplasm of right kidney and renal pelvis       | Neoplasm |
| C7902 | ICD-10 Diagnosis | Secondary malignant neoplasm of left kidney and renal pelvis        | Neoplasm |
| C7910 | ICD-10 Diagnosis | Secondary malignant neoplasm of unspecified urinary organs          | Neoplasm |
| C7911 | ICD-10 Diagnosis | Secondary malignant neoplasm of bladder                             | Neoplasm |
| C7919 | ICD-10 Diagnosis | Secondary malignant neoplasm of other urinary organs                | Neoplasm |
| C792  | ICD-10 Diagnosis | Secondary malignant neoplasm of skin                                | Neoplasm |
| C7931 | ICD-10 Diagnosis | Secondary malignant neoplasm of brain                               | Neoplasm |
| C7932 | ICD-10 Diagnosis | Secondary malignant neoplasm of cerebral meninges                   | Neoplasm |
| C7940 | ICD-10 Diagnosis | Secondary malignant neoplasm of unspecified part of nervous system  | Neoplasm |
| C7949 | ICD-10 Diagnosis | Secondary malignant neoplasm of other parts of nervous system       | Neoplasm |
| C7951 | ICD-10 Diagnosis | Secondary malignant neoplasm of bone                                | Neoplasm |
| C7952 | ICD-10 Diagnosis | Secondary malignant neoplasm of bone marrow                         | Neoplasm |
| C7960 | ICD-10 Diagnosis | Secondary malignant neoplasm of unspecified ovary                   | Neoplasm |
| C7961 | ICD-10 Diagnosis | Secondary malignant neoplasm of right ovary                         | Neoplasm |
| C7962 | ICD-10 Diagnosis | Secondary malignant neoplasm of left ovary                          | Neoplasm |
| C7970 | ICD-10 Diagnosis | Secondary malignant neoplasm of unspecified adrenal gland           | Neoplasm |
| C7971 | ICD-10 Diagnosis | Secondary malignant neoplasm of right adrenal gland                 | Neoplasm |
| C7972 | ICD-10 Diagnosis | Secondary malignant neoplasm of left adrenal gland                  | Neoplasm |

|       |                  |                                                                                  |          |
|-------|------------------|----------------------------------------------------------------------------------|----------|
| C7981 | ICD-10 Diagnosis | Secondary malignant neoplasm of breast                                           | Neoplasm |
| C7982 | ICD-10 Diagnosis | Secondary malignant neoplasm of genital organs                                   | Neoplasm |
| C7989 | ICD-10 Diagnosis | Secondary malignant neoplasm of other specified sites                            | Neoplasm |
| C799  | ICD-10 Diagnosis | Secondary malignant neoplasm of unspecified site                                 | Neoplasm |
| C800  | ICD-10 Diagnosis | Disseminated malignant neoplasm, unspecified                                     | Neoplasm |
| C801  | ICD-10 Diagnosis | Malignant (primary) neoplasm, unspecified                                        | Neoplasm |
| C802  | ICD-10 Diagnosis | Malignant neoplasm associated with transplanted organ                            | Neoplasm |
| C77   | ICD-10 Diagnosis | Secondary and unspecified malignant neoplasm of lymph nodes                      | Neoplasm |
| C78   | ICD-10 Diagnosis | Secondary malignant neoplasm of respiratory and digestive organs                 | Neoplasm |
| C780  | ICD-10 Diagnosis | Secondary malignant neoplasm of lung                                             | Neoplasm |
| C783  | ICD-10 Diagnosis | Secondary malignant neoplasm of other and unspecified respiratory organs         | Neoplasm |
| C788  | ICD-10 Diagnosis | Secondary malignant neoplasm of other and unspecified digestive organs           | Neoplasm |
| C79   | ICD-10 Diagnosis | Secondary malignant neoplasm of other and unspecified sites                      | Neoplasm |
| C790  | ICD-10 Diagnosis | Secondary malignant neoplasm of kidney and renal pelvis                          | Neoplasm |
| C791  | ICD-10 Diagnosis | Secondary malignant neoplasm of bladder and other and unspecified urinary organs | Neoplasm |
| C793  | ICD-10 Diagnosis | Secondary malignant neoplasm of brain and cerebral meninges                      | Neoplasm |
| C794  | ICD-10 Diagnosis | Secondary malignant neoplasm of other and unspecified parts of nervous system    | Neoplasm |
| C795  | ICD-10 Diagnosis | Secondary malignant neoplasm of bone and bone marrow                             | Neoplasm |
| C796  | ICD-10 Diagnosis | Secondary malignant neoplasm of ovary                                            | Neoplasm |
| C797  | ICD-10 Diagnosis | Secondary malignant neoplasm of adrenal gland                                    | Neoplasm |
| C798  | ICD-10 Diagnosis | Secondary malignant neoplasm of other specified sites                            | Neoplasm |

|                |                  |                                                                                         |                          |
|----------------|------------------|-----------------------------------------------------------------------------------------|--------------------------|
| C80            | ICD-10 Diagnosis | Malignant neoplasm without specification of site                                        | Neoplasm                 |
| G061           | ICD-10 Diagnosis | Intraspinal abscess                                                                     | Intraspinal abscess      |
| A1781          | ICD-10 Diagnosis | Tuberculous abscess of brain and spinal cord                                            | Intraspinal abscess      |
| M45.X          | ICD-10 Diagnosis | Ankylosing spondylitis                                                                  | Inflammatory spondylosis |
| M46.X          | ICD-10 Diagnosis | Other inflammatory spondylopathies                                                      | Inflammatory spondylosis |
| M0028          | ICD-10 Diagnosis | Other streptococcal arthritis, vertebrae                                                | Inflammatory spondylosis |
| M0088          | ICD-10 Diagnosis | Arthritis due to other bacteria, vertebrae                                              | Inflammatory spondylosis |
| M0008          | ICD-10 Diagnosis | Staphylococcal arthritis, vertebrae                                                     | Inflammatory spondylosis |
| M0018          | ICD-10 Diagnosis | Pneumococcal arthritis, vertebrae                                                       | Inflammatory spondylosis |
| L40.53         | ICD-10 Diagnosis | Psoriatic spondylitis                                                                   | Inflammatory spondylosis |
| M01.X8         | ICD-10 Diagnosis | Direct infection of vertebrae in infectious and parasitic diseases classified elsewhere | Inflammatory spondylosis |
| A54.41         | ICD-10 Diagnosis | Gonococcal spondylopathy                                                                | Inflammatory spondylosis |
| M86.X          | ICD-10 Diagnosis | Osteomyelitis periostitis and other infections involving bone                           | Osteomyelitis            |
| A18.01         | ICD-10 Diagnosis | Tuberculosis of spine                                                                   | Osteomyelitis            |
| <u>V00-V09</u> | ICD-10 Diagnosis | Pedestrian injured in transport accident                                                | Transportation injuries  |
| <u>V10-V19</u> | ICD-10 Diagnosis | Pedal cycle rider injured in transport accident                                         | Transportation injuries  |
| <u>V20-V29</u> | ICD-10 Diagnosis | Motorcycle rider injured in transport accident                                          | Transportation injuries  |
| <u>V30-V39</u> | ICD-10 Diagnosis | Occupant of three-wheeled motor vehicle injured in transport accident                   | Transportation injuries  |
| <u>V40-V49</u> | ICD-10 Diagnosis | Car occupant injured in transport accident                                              | Transportation injuries  |
| <u>V50-V59</u> | ICD-10 Diagnosis | Occupant of pick-up truck or van injured in transport accident                          | Transportation injuries  |
| <u>V60-V69</u> | ICD-10 Diagnosis | Occupant of heavy transport vehicle injured in transport accident                       | Transportation injuries  |
| <u>V70-V79</u> | ICD-10 Diagnosis | Bus occupant injured in transport accident                                              | Transportation injuries  |
| <u>V80-V89</u> | ICD-10 Diagnosis | Other land transport accidents                                                          | Transportation injuries  |
| <u>V90-V94</u> | ICD-10 Diagnosis | Water transport accidents                                                               | Transportation injuries  |
| <u>V95-V97</u> | ICD-10 Diagnosis | Air and space transport accidents                                                       | Transportation injuries  |
| <u>V98-V99</u> | ICD-10 Diagnosis | Other and unspecified transport accidents                                               | Transportation injuries  |
| W20-W49        | ICD-10 Diagnosis | Exposure to inanimate mechanical forces                                                 | Transportation injuries  |
| <u>W50-W64</u> | ICD-10 Diagnosis | Exposure to animate mechanical forces                                                   | Transportation injuries  |
| <u>W65-W74</u> | ICD-10 Diagnosis | Exposure to forces of nature                                                            | Transportation injuries  |

|                |                  |                                                                           |                         |
|----------------|------------------|---------------------------------------------------------------------------|-------------------------|
| <u>X71-X83</u> | ICD-10 Diagnosis | Intentional self-harm                                                     | Transportation injuries |
| <u>X92-Y09</u> | ICD-10 Diagnosis | Assault                                                                   | Transportation injuries |
| <u>Y21-Y33</u> | ICD-10 Diagnosis | Event of undetermined intent                                              | Transportation injuries |
| <u>Y35-Y38</u> | ICD-10 Diagnosis | Legal intervention, operations of war, military operations, and terrorism | Transportation injuries |
| X52-X58        | ICD-10 Diagnosis | Accidental exposure to other specified factors                            | Transportation injuries |
| M483           | ICD-10 Diagnosis | Traumatic spondylopathy                                                   | Transportation injuries |
| G834           | ICD-10 Diagnosis | Cauda equina syndrome                                                     | Spinal cord injuries    |
| G8381          | ICD-10 Diagnosis | Brown-Sequard syndrome                                                    | Spinal cord injuries    |
| G8382          | ICD-10 Diagnosis | Anterior cord syndrome                                                    | Spinal cord injuries    |
| G8383          | ICD-10 Diagnosis | Posterior cord syndrome                                                   | Spinal cord injuries    |
| G9511          | ICD-10 Diagnosis | Acute infarction of spinal cord (embolic) (nonembolic)                    | Spinal cord injuries    |
| G9520          | ICD-10 Diagnosis | Unspecified cord compression                                              | Spinal cord injuries    |
| G9529          | ICD-10 Diagnosis | Other cord compression                                                    | Spinal cord injuries    |
| G9581          | ICD-10 Diagnosis | Conus medullaris syndrome                                                 | Spinal cord injuries    |
| M4630          | ICD-10 Diagnosis | Infection of intervertebral disc (pyogenic), site unspecified             | Spinal cord injuries    |
| M4633          | ICD-10 Diagnosis | Infection of intervertebral disc (pyogenic), cervicothoracic region       | Spinal cord injuries    |
| M4634          | ICD-10 Diagnosis | Infection of intervertebral disc (pyogenic), thoracic region              | Spinal cord injuries    |
| M4635          | ICD-10 Diagnosis | Infection of intervertebral disc (pyogenic), thoracolumbar region         | Spinal cord injuries    |
| M4636          | ICD-10 Diagnosis | Infection of intervertebral disc (pyogenic), lumbar region                | Spinal cord injuries    |
| M4637          | ICD-10 Diagnosis | Infection of intervertebral disc (pyogenic), lumbosacral region           | Spinal cord injuries    |
| M4640          | ICD-10 Diagnosis | Discitis, unspecified, site unspecified                                   | Spinal cord injuries    |
| M4643          | ICD-10 Diagnosis | Discitis, unspecified, cervicothoracic region                             | Spinal cord injuries    |
| M4644          | ICD-10 Diagnosis | Discitis, unspecified, thoracic region                                    | Spinal cord injuries    |
| M4645          | ICD-10 Diagnosis | Discitis, unspecified, thoracolumbar region                               | Spinal cord injuries    |
| M4646          | ICD-10 Diagnosis | Discitis, unspecified, lumbar region                                      | Spinal cord injuries    |
| M4647          | ICD-10 Diagnosis | Discitis, unspecified, lumbosacral region                                 | Spinal cord injuries    |
| M4649          | ICD-10 Diagnosis | Discitis, unspecified, multiple sites in spine                            | Spinal cord injuries    |
| M4650          | ICD-10 Diagnosis | Other infective spondylopathies, site unspecified                         | Spinal cord injuries    |
| M4654          | ICD-10 Diagnosis | Other infective spondylopathies, thoracic region                          | Spinal cord injuries    |

|         |                  |                                                                                                    |                      |
|---------|------------------|----------------------------------------------------------------------------------------------------|----------------------|
| M4655   | ICD-10 Diagnosis | Other infective spondylopathies, thoracolumbar region                                              | Spinal cord injuries |
| M4656   | ICD-10 Diagnosis | Other infective spondylopathies, lumbar region                                                     | Spinal cord injuries |
| M4657   | ICD-10 Diagnosis | Other infective spondylopathies, lumbosacral region                                                | Spinal cord injuries |
| M47013  | ICD-10 Diagnosis | Anterior spinal artery compression syndromes, cervicothoracic region                               | Spinal cord injuries |
| M47014  | ICD-10 Diagnosis | Anterior spinal artery compression syndromes, thoracic region                                      | Spinal cord injuries |
| M47016  | ICD-10 Diagnosis | Anterior spinal artery compression syndromes, lumbar region                                        | Spinal cord injuries |
| M47019  | ICD-10 Diagnosis | Anterior spinal artery compression syndromes, site unspecified                                     | Spinal cord injuries |
| S2410.X | ICD-10 Diagnosis | Unspecified injury at T1 level of thoracic spinal cord                                             | Spinal cord injuries |
| S2411.X | ICD-10 Diagnosis | Complete lesion at T1 level of thoracic spinal cord                                                | Spinal cord injuries |
| S2413.X | ICD-10 Diagnosis | Anterior cord syndrome at T1 level of thoracic spinal cord                                         | Spinal cord injuries |
| S2414.X | ICD-10 Diagnosis | Brown-Séquard syndrome of thoracic spinal cord                                                     | Spinal cord injuries |
| S2415.X | ICD-10 Diagnosis | Other incomplete lesion at T1 level of thoracic spinal cord                                        | Spinal cord injuries |
| S3410.X | ICD-10 Diagnosis | Unspecified injury to L1 level of lumbar spinal cord                                               | Spinal cord injuries |
| S3411.X | ICD-10 Diagnosis | Complete lesion of L1 level of lumbar spinal cord                                                  | Spinal cord injuries |
| S3412.X | ICD-10 Diagnosis | Incomplete lesion of lumbar spinal cord                                                            | Spinal cord injuries |
| S343.X  | ICD-10 Diagnosis | Injury of cauda equina                                                                             | Spinal cord injuries |
| T8463XA | ICD-10 Diagnosis | Infection and inflammatory reaction due to internal fixation device of spine, initial encounter    | Spinal cord injuries |
| T8463XD | ICD-10 Diagnosis | Infection and inflammatory reaction due to internal fixation device of spine, subsequent encounter | Spinal cord injuries |
| T8463XS | ICD-10 Diagnosis | Infection and inflammatory reaction due to internal fixation device of spine, sequela              | Spinal cord injuries |

22513 CPT PERCUTANEOUS VERTEBRAL  
AUGMENTATION, INCLUDING CAVITY  
CREATION (FRACTURE REDUCTION AND BONE  
BIOPSY INCLUDED WHEN PERFORMED) USING  
MECHANICAL DEVICE (EG, KYPHOPLASTY), 1  
VERTEBRAL BODY, UNILATERAL OR BILATERAL  
CANNULATION, INCLUSIVE OF ALL IMAGING  
GUIDANCE; THORACIC Kyphoplasty

22514 CPT PERCUTANEOUS VERTEBRAL  
AUGMENTATION, INCLUDING CAVITY  
CREATION (FRACTURE REDUCTION AND BONE  
BIOPSY INCLUDED WHEN PERFORMED) USING  
MECHANICAL DEVICE (EG, KYPHOPLASTY), 1  
VERTEBRAL BODY, UNILATERAL OR BILATERAL  
CANNULATION, INCLUSIVE OF ALL IMAGING  
GUIDANCE; LUMBAR Kyphoplasty

22515 CPT PERCUTANEOUS VERTEBRAL  
AUGMENTATION, INCLUDING CAVITY  
CREATION (FRACTURE REDUCTION AND BONE  
BIOPSY INCLUDED WHEN PERFORMED) USING  
MECHANICAL DEVICE (EG, KYPHOPLASTY), 1  
VERTEBRAL BODY, UNILATERAL OR BILATERAL  
CANNULATION, INCLUSIVE OF ALL IMAGING  
GUIDANCE; EACH ADDITIONAL THORACIC OR  
LUMBAR VERTEBRAL BODY (LIST SEPARATELY  
IN ADDITION TO CODE FOR PRIMARY  
PROCEDURE) Kyphoplasty

22523 CPT PERCUTANEOUS VERTEBRAL  
AUGMENTATION, INCLUDING CAVITY  
CREATION (FRACTURE REDUCTION AND BONE  
BIOPSY INCLUDED WHEN PERFORMED) USING  
MECHANICAL DEVICE (EG, KYPHOPLASTY), 1  
VERTEBRAL BODY, UNILATERAL OR BILATERAL  
CANNULATION, INCLUSIVE OF ALL IMAGING  
GUIDANCE; THORACIC Kyphoplasty

22524 CPT PERCUTANEOUS VERTEBRAL  
AUGMENTATION, INCLUDING CAVITY  
CREATION (FRACTURE REDUCTION AND BONE  
BIOPSY INCLUDED WHEN PERFORMED) USING  
MECHANICAL DEVICE (EG, KYPHOPLASTY), 1  
VERTEBRAL BODY, UNILATERAL OR BILATERAL  
CANNULATION, INCLUSIVE OF ALL IMAGING  
GUIDANCE; LUMBAR Kyphoplasty

|         |                  |                                                                                                                                                                                                                                                                                                                                                                                |                |
|---------|------------------|--------------------------------------------------------------------------------------------------------------------------------------------------------------------------------------------------------------------------------------------------------------------------------------------------------------------------------------------------------------------------------|----------------|
|         |                  | PERCUTANEOUS VERTEBRAL AUGMENTATION, INCLUDING CAVITY CREATION (FRACTURE REDUCTION AND BONE BIOPSY INCLUDED WHEN PERFORMED) USING MECHANICAL DEVICE (EG, KYPHOPLASTY), 1 VERTEBRAL BODY, UNILATERAL OR BILATERAL CANNULATION, INCLUSIVE OF ALL IMAGING GUIDANCE; EACH ADDITIONAL THORACIC OR LUMBAR VERTEBRAL BODY (LIST SEPARATELY IN ADDITION TO CODE FOR PRIMARY PROCEDURE) | Kyphoplasty    |
| 22525   | CPT              | Reposition Thoracic Vertebra, Percutaneous Approach                                                                                                                                                                                                                                                                                                                            | Kyphoplasty    |
| OPS43ZZ | ICD-10 Procedure | Reposition Lumbar Vertebra, Percutaneous Approach                                                                                                                                                                                                                                                                                                                              | Kyphoplasty    |
| OQS03ZZ | ICD-10 Procedure | PERCUTANEOUS VERTEBROPLASTY (BONE BIOPSY INCLUDED WHEN PERFORMED), 1 VERTEBRAL BODY, UNILATERAL OR BILATERAL INJECTION, INCLUSIVE OF ALL IMAGING GUIDANCE; CERVICOTHORACIC                                                                                                                                                                                                     | Vertebroplasty |
| 22510   | CPT              | PERCUTANEOUS VERTEBROPLASTY (BONE BIOPSY INCLUDED WHEN PERFORMED), 1 VERTEBRAL BODY, UNILATERAL OR BILATERAL INJECTION, INCLUSIVE OF ALL IMAGING GUIDANCE; LUMBOSACRAL                                                                                                                                                                                                         | Vertebroplasty |
| 22511   | CPT              | PERCUTANEOUS VERTEBROPLASTY (BONE BIOPSY INCLUDED WHEN PERFORMED), 1 VERTEBRAL BODY, UNILATERAL OR BILATERAL INJECTION, INCLUSIVE OF ALL IMAGING GUIDANCE; EACH ADDITIONAL CERVICOTHORACIC OR LUMBOSACRAL VERTEBRAL BODY (LIST SEPARATELY IN ADDITION TO CODE FOR PRIMARY PROCEDURE)                                                                                           | Vertebroplasty |
| 22512   | CPT              | PERCUTANEOUS VERTEBROPLASTY (BONE BIOPSY INCLUDED WHEN PERFORMED), 1 VERTEBRAL BODY, UNILATERAL OR BILATERAL INJECTION, INCLUSIVE OF ALL IMAGING GUIDANCE; CERVICOTHORACIC                                                                                                                                                                                                     | Vertebroplasty |
| 22520   | CPT              | PERCUTANEOUS VERTEBROPLASTY (BONE BIOPSY INCLUDED WHEN PERFORMED), 1 VERTEBRAL BODY, UNILATERAL OR BILATERAL INJECTION, INCLUSIVE OF ALL IMAGING GUIDANCE; LUMBOSACRAL                                                                                                                                                                                                         | Vertebroplasty |
| 22521   | CPT              | PERCUTANEOUS VERTEBROPLASTY (BONE BIOPSY INCLUDED WHEN PERFORMED), 1 VERTEBRAL BODY, UNILATERAL OR BILATERAL INJECTION, INCLUSIVE OF ALL IMAGING GUIDANCE; EACH ADDITIONAL CERVICOTHORACIC OR LUMBOSACRAL VERTEBRAL BODY (LIST SEPARATELY IN ADDITION TO CODE FOR PRIMARY PROCEDURE)                                                                                           | Vertebroplasty |
| 22522   | CPT              |                                                                                                                                                                                                                                                                                                                                                                                | Vertebroplasty |



|         |                  |                                                                                          |                          |
|---------|------------------|------------------------------------------------------------------------------------------|--------------------------|
| OPU43JZ | ICD-10 Procedure | Supplement Thoracic Vertebra with Synthetic Substitute, Percutaneous Approach            | Vertebroplasty           |
| OPU44JZ | ICD-10 Procedure | Supplement Thoracic Vertebra with Synthetic Substitute, Percutaneous Endoscopic Approach | Vertebroplasty           |
| 0QU03JZ | ICD-10 Procedure | Supplement Lumbar Vertebra with Synthetic Substitute, Percutaneous Approach              | Vertebroplasty           |
| 0QU04JZ | ICD-10 Procedure | Supplement Lumbar Vertebra with Synthetic Substitute, Percutaneous Endoscopic Approach   | Vertebroplasty           |
| 22899   | CPT              | Other procedures of the spine                                                            | Unlisted Spine Procedure |
| 0QN00ZZ | ICD-10 Procedure | Release Lumbar Vertebra, Open approach                                                   | Unlisted Spine Procedure |
| 0QN03ZZ | ICD-10 Procedure | Release Lumbar Vertebra, percutaneous approach                                           | Unlisted Spine Procedure |
| 0QN04ZZ | ICD-10 Procedure | Release Lumbar Vertebra, percutaneous endoscopic approach                                | Unlisted Spine Procedure |
| OPN40ZZ | ICD-10 Procedure | Release Thoracic Vertebra, Open Approach                                                 | Unlisted Spine Procedure |
| 0PQ43ZZ | ICD-10 Procedure | Repair Thoracic Vertebra, Percutaneous Approach                                          | Unlisted Spine Procedure |
| 0QQ03ZZ | ICD-10 Procedure | Repair Lumbar Vertebra, Percutaneous Approach                                            | Unlisted Spine Procedure |
| 0QQ04ZZ | ICD-10 Procedure | Repair Lumbar Vertebra, Percutaneous Endoscopic Approach                                 | Unlisted Spine Procedure |
| 0QQ44ZZ | ICD-10 Procedure | Repair Thoracic Vertebra, Percutaneous Endoscopic Approach                               | Unlisted Spine Procedure |
| 0QQ4XZZ | ICD-10 Procedure | Repair Thoracic Vertebra, External Approach                                              | Unlisted Spine Procedure |
| 0QQ04ZZ | ICD-10 Procedure | Repair Lumbar Vertebra, Percutaneous Endoscopic Approach                                 | Unlisted Spine Procedure |
| 0QQ0XZZ | ICD-10 Procedure | Repair Lumbar Vertebra, External Approach                                                | Unlisted Spine Procedure |
| 11982   | CPT              | Remove drug implant device                                                               | Major spine surgery      |
| 11983   | CPT              | Remove/insert drug implant                                                               | Major spine surgery      |
| 20660   | CPT              | Apply rem fixation device                                                                | Major spine surgery      |
| 20661   | CPT              | Application of head brace                                                                | Major spine surgery      |
| 20664   | CPT              | Application of halo                                                                      | Major spine surgery      |
| 20665   | CPT              | Removal of fixation device                                                               | Major spine surgery      |
| 20670   | CPT              | Removal of support implant                                                               | Major spine surgery      |
| 20680   | CPT              | Removal of support implant                                                               | Major spine surgery      |
| 21899   | CPT              | Neck/chest surgery procedure                                                             | Major spine surgery      |
| 22010   | CPT              | I&d p-spine c/t/cerv-thor                                                                | Major spine surgery      |
| 22015   | CPT              | I&d abscess p-spine l/s/l                                                                | Major spine surgery      |
| 22100   | CPT              | Remove part of neck vertebra                                                             | Major spine surgery      |

|       |     |                              |                     |
|-------|-----|------------------------------|---------------------|
| 22101 | CPT | Remove part thorax vertebra  | Major spine surgery |
| 22102 | CPT | Remove part lumbar vertebra  | Major spine surgery |
| 22110 | CPT | Remove part of neck vertebra | Major spine surgery |
| 22112 | CPT | Remove part thorax vertebra  | Major spine surgery |
| 22114 | CPT | Remove part lumbar vertebra  | Major spine surgery |
| 22206 | CPT | Incis spine 3 column thorac  | Major spine surgery |
| 22207 | CPT | Incis spine 3 column lumbar  | Major spine surgery |
| 22210 | CPT | Incis 1 vertebral seg cerv   | Major spine surgery |
| 22212 | CPT | Incis 1 vertebral seg thorac | Major spine surgery |
| 22214 | CPT | Incis 1 vertebral seg lumbar | Major spine surgery |
| 22220 | CPT | Incis w/discectomy cervical  | Major spine surgery |
| 22222 | CPT | Incis w/discectomy thoracic  | Major spine surgery |
| 22224 | CPT | Incis w/discectomy lumbar    | Major spine surgery |
| 22318 | CPT | Treat odontoid fx w/o graft  | Major spine surgery |
| 22319 | CPT | Treat odontoid fx w/graft    | Major spine surgery |
| 22325 | CPT | Treat spine fracture         | Major spine surgery |
| 22326 | CPT | Treat neck spine fracture    | Major spine surgery |
| 22327 | CPT | Treat thorax spine fracture  | Major spine surgery |
| 22532 | CPT | Lat thorax spine fusion      | Major spine surgery |
| 22533 | CPT | Lat lumbar spine fusion      | Major spine surgery |
| 22548 | CPT | Neck spine fusion            | Major spine surgery |
| 22554 | CPT | Neck spine fusion            | Major spine surgery |
| 22556 | CPT | Thorax spine fusion          | Major spine surgery |
| 22558 | CPT | Lumbar spine fusion          | Major spine surgery |
| 22590 | CPT | Spine & skull spinal fusion  | Major spine surgery |
| 22595 | CPT | Neck spinal fusion           | Major spine surgery |
| 22600 | CPT | Neck spine fusion            | Major spine surgery |
| 22610 | CPT | Thorax spine fusion          | Major spine surgery |
| 22612 | CPT | Lumbar spine fusion          | Major spine surgery |
| 22630 | CPT | Lumbar spine fusion          | Major spine surgery |
| 22850 | CPT | Remove spine fixation device | Major spine surgery |
| 22852 | CPT | Remove spine fixation device | Major spine surgery |
| 22855 | CPT | Remove spine fixation device | Major spine surgery |
| 22856 | CPT | Cerv artific diskectomy      | Major spine surgery |
| 22861 | CPT | Revise cerv artific disc     | Major spine surgery |
| 22862 | CPT | Revise lumbar artif disc     | Major spine surgery |
| 22864 | CPT | Remove cerv artif disc       | Major spine surgery |
| 22865 | CPT | Remove lumb artif disc       | Major spine surgery |
| 27096 | CPT | Inject sacroiliac joint      | Major spine surgery |
| 62281 | CPT | Treat spinal cord lesion     | Major spine surgery |
| 62282 | CPT | Treat spinal canal lesion    | Major spine surgery |
| 62287 | CPT | Percutaneous diskectomy      | Major spine surgery |
| 62350 | CPT | Implant spinal canal cath    | Major spine surgery |
| 62351 | CPT | Implant spinal canal cath    | Major spine surgery |
| 62355 | CPT | Remove spinal canal catheter | Major spine surgery |
| 62365 | CPT | Remove spine infusion device | Major spine surgery |
| 63001 | CPT | Remove spine lamina 1/2 crvl | Major spine surgery |

|       |     |                                 |                     |
|-------|-----|---------------------------------|---------------------|
| 63003 | CPT | Remove spine lamina 1/2 thrc    | Major spine surgery |
| 63005 | CPT | Remove spine lamina 1/2 Imbr    | Major spine surgery |
| 63011 | CPT | Remove spine lamina 1/2 scrcl   | Major spine surgery |
| 63012 | CPT | Remove lamina/facets lumbar     | Major spine surgery |
| 63015 | CPT | Remove spine lamina >2 crvcl    | Major spine surgery |
| 63016 | CPT | Remove spine lamina >2 thrc     | Major spine surgery |
| 63017 | CPT | Remove spine lamina >2 Imbr     | Major spine surgery |
| 63020 | CPT | Neck spine disk surgery         | Major spine surgery |
| 63030 | CPT | Low back disk surgery           | Major spine surgery |
| 63040 | CPT | Laminotomy single cervical      | Major spine surgery |
| 63042 | CPT | Laminotomy single lumbar        | Major spine surgery |
| 63045 | CPT | Remove spine lamina 1 crvl      | Major spine surgery |
| 63046 | CPT | Remove spine lamina 1 thrc      | Major spine surgery |
| 63047 | CPT | Remove spine lamina 1 Imbr      | Major spine surgery |
| 63050 | CPT | Cervical laminoplasty 2/> seg   | Major spine surgery |
| 63051 | CPT | C-laminoplasty w/graft/plate    | Major spine surgery |
| 63055 | CPT | Decompress spinal cord thrc     | Major spine surgery |
| 63056 | CPT | Decompress spinal cord Imbr     | Major spine surgery |
| 63064 | CPT | Decompress spinal cord thrc     | Major spine surgery |
| 63075 | CPT | Neck spine disk surgery         | Major spine surgery |
| 63077 | CPT | Spine disk surgery thorax       | Major spine surgery |
| 63081 | CPT | Remove vert body dcmprn crvl    | Major spine surgery |
| 63085 | CPT | Remove vert body dcmprn thrc    | Major spine surgery |
| 63087 | CPT | Remov vertbr dcmprn thrclmbr    | Major spine surgery |
| 63180 | CPT | Revise spinal cord ligaments    | Major spine surgery |
| 63182 | CPT | Revise spinal cord ligaments    | Major spine surgery |
| 63194 | CPT | Incise spine & cord cervical    | Major spine surgery |
| 63195 | CPT | Incise spine & cord thoracic    | Major spine surgery |
| 63196 | CPT | Incise spine&cord 2 trx crvl    | Major spine surgery |
| 63197 | CPT | Incise spine&cord 2 trx thrc    | Major spine surgery |
| 63198 | CPT | Incise spin&cord 2 stgs crvl    | Major spine surgery |
| 63199 | CPT | Incise spin&cord 2 stgs thrc    | Major spine surgery |
| 63200 | CPT | Release spinal cord lumbar      | Major spine surgery |
| 63250 | CPT | Revise spinal cord vsls crvl    | Major spine surgery |
| 63251 | CPT | Revise spinal cord vsls thrc    | Major spine surgery |
| 63252 | CPT | Revise spine cord vsl thrlmb    | Major spine surgery |
| 63265 | CPT | Excise intraspinal lesion crv   | Major spine surgery |
| 63266 | CPT | Excise intraspinal lesion thrc  | Major spine surgery |
| 63267 | CPT | Excise intraspinal lesion Imbr  | Major spine surgery |
| 63268 | CPT | Excise intraspinal lesion scrcl | Major spine surgery |
| 63270 | CPT | Excise intraspinal lesion crvl  | Major spine surgery |
| 63271 | CPT | Excise intraspinal lesion thrc  | Major spine surgery |
| 63272 | CPT | Excise intraspinal lesion Imbr  | Major spine surgery |
| 63273 | CPT | Excise intraspinal lesion scrcl | Major spine surgery |
| 63300 | CPT | Remove vert xdrl body crvcl     | Major spine surgery |
| 63301 | CPT | Remove vert xdrl body thrc      | Major spine surgery |
| 63302 | CPT | Remove vert xdrl body thrlmb    | Major spine surgery |

|       |     |                              |                     |
|-------|-----|------------------------------|---------------------|
| 63303 | CPT | Remov vert xdrl bdy lmb/sac  | Major spine surgery |
| 63304 | CPT | Remove vert idrl body crvcl  | Major spine surgery |
| 63305 | CPT | Remove vert idrl body thr    | Major spine surgery |
| 63306 | CPT | Remov vert idrl bdy thrclmbr | Major spine surgery |
| 63307 | CPT | Remov vert idrl bdy lmb/sac  | Major spine surgery |
| 63688 | CPT | Revise/remove neuroreceiver  | Major spine surgery |
| 64714 | CPT | Revise low back nerve(s)     | Major spine surgery |
| 11982 | CPT | Remove drug implant device   | Major spine surgery |
| 11983 | CPT | Remove/insert drug implant   | Major spine surgery |
| 20660 | CPT | Apply rem fixation device    | Major spine surgery |
| 20661 | CPT | Application of head brace    | Major spine surgery |
| 20664 | CPT | Application of halo          | Major spine surgery |
| 20665 | CPT | Removal of fixation device   | Major spine surgery |
| 20670 | CPT | Removal of support implant   | Major spine surgery |
| 20680 | CPT | Removal of support implant   | Major spine surgery |
| 21899 | CPT | Neck/chest surgery procedure | Major spine surgery |
| 22010 | CPT | I&d p-spine c/t/cerv-thor    | Major spine surgery |
| 22015 | CPT | I&d abscess p-spine l/s/l    | Major spine surgery |
| 22100 | CPT | Remove part of neck vertebra | Major spine surgery |
| 22101 | CPT | Remove part thorax vertebra  | Major spine surgery |
| 22102 | CPT | Remove part lumbar vertebra  | Major spine surgery |
| 22110 | CPT | Remove part of neck vertebra | Major spine surgery |
| 22112 | CPT | Remove part thorax vertebra  | Major spine surgery |
| 22114 | CPT | Remove part lumbar vertebra  | Major spine surgery |
| 22206 | CPT | Incis spine 3 column thorac  | Major spine surgery |
| 22207 | CPT | Incis spine 3 column lumbar  | Major spine surgery |
| 22210 | CPT | Incis 1 vertebral seg cerv   | Major spine surgery |
| 22212 | CPT | Incis 1 vertebral seg thorac | Major spine surgery |
| 22214 | CPT | Incis 1 vertebral seg lumbar | Major spine surgery |
| 22220 | CPT | Incis w/discectomy cervical  | Major spine surgery |
| 22222 | CPT | Incis w/discectomy thoracic  | Major spine surgery |
| 22224 | CPT | Incis w/discectomy lumbar    | Major spine surgery |
| 22318 | CPT | Treat odontoid fx w/o graft  | Major spine surgery |
| 22319 | CPT | Treat odontoid fx w/graft    | Major spine surgery |
| 22325 | CPT | Treat spine fracture         | Major spine surgery |
| 22326 | CPT | Treat neck spine fracture    | Major spine surgery |
| 22327 | CPT | Treat thorax spine fracture  | Major spine surgery |
| 22532 | CPT | Lat thorax spine fusion      | Major spine surgery |
| 22533 | CPT | Lat lumbar spine fusion      | Major spine surgery |
| 22548 | CPT | Neck spine fusion            | Major spine surgery |
| 22554 | CPT | Neck spine fusion            | Major spine surgery |
| 22556 | CPT | Thorax spine fusion          | Major spine surgery |
| 22558 | CPT | Lumbar spine fusion          | Major spine surgery |
| 22590 | CPT | Spine & skull spinal fusion  | Major spine surgery |
| 22595 | CPT | Neck spinal fusion           | Major spine surgery |
| 22600 | CPT | Neck spine fusion            | Major spine surgery |
| 22610 | CPT | Thorax spine fusion          | Major spine surgery |

|       |     |                               |                     |
|-------|-----|-------------------------------|---------------------|
| 22612 | CPT | Lumbar spine fusion           | Major spine surgery |
| 22630 | CPT | Lumbar spine fusion           | Major spine surgery |
| 22850 | CPT | Remove spine fixation device  | Major spine surgery |
| 22852 | CPT | Remove spine fixation device  | Major spine surgery |
| 22855 | CPT | Remove spine fixation device  | Major spine surgery |
| 22856 | CPT | Cerv artific diskectomy       | Major spine surgery |
| 22861 | CPT | Revise cerv artific disc      | Major spine surgery |
| 22862 | CPT | Revise lumbar artif disc      | Major spine surgery |
| 22864 | CPT | Remove cerv artif disc        | Major spine surgery |
| 22865 | CPT | Remove lumb artif disc        | Major spine surgery |
| 62281 | CPT | Treat spinal cord lesion      | Major spine surgery |
| 62282 | CPT | Treat spinal canal lesion     | Major spine surgery |
| 62287 | CPT | Percutaneous diskectomy       | Major spine surgery |
| 62350 | CPT | Implant spinal canal cath     | Major spine surgery |
| 62351 | CPT | Implant spinal canal cath     | Major spine surgery |
| 62355 | CPT | Remove spinal canal catheter  | Major spine surgery |
| 62365 | CPT | Remove spine infusion device  | Major spine surgery |
| 63001 | CPT | Remove spine lamina 1/2 crvl  | Major spine surgery |
| 63003 | CPT | Remove spine lamina 1/2 thrc  | Major spine surgery |
| 63005 | CPT | Remove spine lamina 1/2 lmbr  | Major spine surgery |
| 63011 | CPT | Remove spine lamina 1/2 scr1  | Major spine surgery |
| 63012 | CPT | Remove lamina/facets lumbar   | Major spine surgery |
| 63015 | CPT | Remove spine lamina >2 crvcl  | Major spine surgery |
| 63016 | CPT | Remove spine lamina >2 thrc   | Major spine surgery |
| 63017 | CPT | Remove spine lamina >2 lmbr   | Major spine surgery |
| 63020 | CPT | Neck spine disk surgery       | Major spine surgery |
| 63030 | CPT | Low back disk surgery         | Major spine surgery |
| 63040 | CPT | Laminotomy single cervical    | Major spine surgery |
| 63042 | CPT | Laminotomy single lumbar      | Major spine surgery |
| 63045 | CPT | Remove spine lamina 1 crvl    | Major spine surgery |
| 63046 | CPT | Remove spine lamina 1 thrc    | Major spine surgery |
| 63047 | CPT | Remove spine lamina 1 lmbr    | Major spine surgery |
| 63050 | CPT | Cervical laminoplasty 2/> seg | Major spine surgery |
| 63051 | CPT | C-laminoplasty w/graft/plate  | Major spine surgery |
| 63055 | CPT | Decompress spinal cord thrc   | Major spine surgery |
| 63056 | CPT | Decompress spinal cord lmbr   | Major spine surgery |
| 63064 | CPT | Decompress spinal cord thrc   | Major spine surgery |
| 63075 | CPT | Neck spine disk surgery       | Major spine surgery |
| 63077 | CPT | Spine disk surgery thorax     | Major spine surgery |
| 63081 | CPT | Remove vert body dcmpn crvl   | Major spine surgery |
| 63085 | CPT | Remove vert body dcmpn thrc   | Major spine surgery |
| 63087 | CPT | Remov vertbr dcmpn thrclmbr   | Major spine surgery |
| 63180 | CPT | Revise spinal cord ligaments  | Major spine surgery |
| 63182 | CPT | Revise spinal cord ligaments  | Major spine surgery |
| 63194 | CPT | Incise spine & cord cervical  | Major spine surgery |
| 63195 | CPT | Incise spine & cord thoracic  | Major spine surgery |
| 63196 | CPT | Incise spine&cord 2 trx crvl  | Major spine surgery |

|         |                  |                                                                                         |                     |
|---------|------------------|-----------------------------------------------------------------------------------------|---------------------|
| 63197   | CPT              | Incise spine&cord 2 trx thrc                                                            | Major spine surgery |
| 63198   | CPT              | Incise spin&cord 2 stgs crvl                                                            | Major spine surgery |
| 63199   | CPT              | Incise spin&cord 2 stgs thrc                                                            | Major spine surgery |
| 63200   | CPT              | Release spinal cord lumbar                                                              | Major spine surgery |
| 63250   | CPT              | Revise spinal cord vsls crvl                                                            | Major spine surgery |
| 63251   | CPT              | Revise spinal cord vsls thrc                                                            | Major spine surgery |
| 63252   | CPT              | Revise spine cord vsl thrlmb                                                            | Major spine surgery |
| 63265   | CPT              | Excise intraspinal lesion crv                                                           | Major spine surgery |
| 63266   | CPT              | Excise intraspinal lesion thrc                                                          | Major spine surgery |
| 63267   | CPT              | Excise intraspinal lesion lmb                                                           | Major spine surgery |
| 63268   | CPT              | Excise intraspinal lesion scl                                                           | Major spine surgery |
| 63270   | CPT              | Excise intraspinal lesion crvl                                                          | Major spine surgery |
| 63271   | CPT              | Excise intraspinal lesion thrc                                                          | Major spine surgery |
| 63272   | CPT              | Excise intraspinal lesion lmb                                                           | Major spine surgery |
| 63273   | CPT              | Excise intraspinal lesion scl                                                           | Major spine surgery |
| 63300   | CPT              | Remove vert xdr body crvcl                                                              | Major spine surgery |
| 63301   | CPT              | Remove vert xdr body thrc                                                               | Major spine surgery |
| 63302   | CPT              | Remove vert xdr body thrlmb                                                             | Major spine surgery |
| 63303   | CPT              | Remove vert xdr body lmb/sac                                                            | Major spine surgery |
| 63304   | CPT              | Remove vert idr body crvcl                                                              | Major spine surgery |
| 63305   | CPT              | Remove vert idr body thrc                                                               | Major spine surgery |
| 63306   | CPT              | Remove vert idr body thrclmb                                                            | Major spine surgery |
| 63307   | CPT              | Remove vert idr body lmb/sac                                                            | Major spine surgery |
| 64714   | CPT              | Revise low back nerve(s)                                                                | Major spine surgery |
| ORP000Z | ICD-10 Procedure | Removal of Drainage Device from Occipital-cervical Joint, Open Approach                 | Major spine surgery |
| ORP003Z | ICD-10 Procedure | Removal of Infusion Device from Occipital-cervical Joint, Open Approach                 | Major spine surgery |
| ORP004Z | ICD-10 Procedure | Removal of Internal Fixation Device from Occipital-cervical Joint, Open Approach        | Major spine surgery |
| ORP007Z | ICD-10 Procedure | Removal of Autologous Tissue Substitute from Occipital-cervical Joint, Open Approach    | Major spine surgery |
| ORP008Z | ICD-10 Procedure | Removal of Spacer from Occipital-cervical Joint, Open Approach                          | Major spine surgery |
| ORP00AZ | ICD-10 Procedure | Removal of Interbody Fusion Device from Occipital-cervical Joint, Open Approach         | Major spine surgery |
| ORP00JZ | ICD-10 Procedure | Removal of Synthetic Substitute from Occipital-cervical Joint, Open Approach            | Major spine surgery |
| ORP00KZ | ICD-10 Procedure | Removal of Nonautologous Tissue Substitute from Occipital-cervical Joint, Open Approach | Major spine surgery |

|         |                  |                                                                                                      |                     |
|---------|------------------|------------------------------------------------------------------------------------------------------|---------------------|
| ORP030Z | ICD-10 Procedure | Removal of Drainage Device from Occipital-cervical Joint, Percutaneous Approach                      | Major spine surgery |
| ORP033Z | ICD-10 Procedure | Removal of Infusion Device from Occipital-cervical Joint, Percutaneous Approach                      | Major spine surgery |
| ORP034Z | ICD-10 Procedure | Removal of Internal Fixation Device from Occipital-cervical Joint, Percutaneous Approach             | Major spine surgery |
| ORP037Z | ICD-10 Procedure | Removal of Autologous Tissue Substitute from Occipital-cervical Joint, Percutaneous Approach         | Major spine surgery |
| ORP038Z | ICD-10 Procedure | Removal of Spacer from Occipital-cervical Joint, Percutaneous Approach                               | Major spine surgery |
| ORP03AZ | ICD-10 Procedure | Removal of Interbody Fusion Device from Occipital-cervical Joint, Percutaneous Approach              | Major spine surgery |
| ORP03JZ | ICD-10 Procedure | Removal of Synthetic Substitute from Occipital-cervical Joint, Percutaneous Approach                 | Major spine surgery |
| ORP03KZ | ICD-10 Procedure | Removal of Nonautologous Tissue Substitute from Occipital-cervical Joint, Percutaneous Approach      | Major spine surgery |
| ORP040Z | ICD-10 Procedure | Removal of Drainage Device from Occipital-cervical Joint, Percutaneous Endoscopic Approach           | Major spine surgery |
| ORP043Z | ICD-10 Procedure | Removal of Infusion Device from Occipital-cervical Joint, Percutaneous Endoscopic Approach           | Major spine surgery |
| ORP044Z | ICD-10 Procedure | Removal of Internal Fixation Device from Occipital-cervical Joint, Percutaneous Endoscopic Approach  | Major spine surgery |
| ORP047Z | ICD-10 Procedure | Removal of Autologous Tissue Substitute from Occipital-cervical Joint, Percutaneous Endoscopic Appro | Major spine surgery |
| ORP048Z | ICD-10 Procedure | Removal of Spacer from Occipital-cervical Joint, Percutaneous Endoscopic Approach                    | Major spine surgery |
| ORP04AZ | ICD-10 Procedure | Removal of Interbody Fusion Device from Occipital-cervical Joint, Percutaneous Endoscopic Approach   | Major spine surgery |
| ORP04JZ | ICD-10 Procedure | Removal of Synthetic Substitute from Occipital-cervical Joint, Percutaneous Endoscopic Approach      | Major spine surgery |

|         |                  |                                                                                                      |                     |
|---------|------------------|------------------------------------------------------------------------------------------------------|---------------------|
| ORP04KZ | ICD-10 Procedure | Removal of Nonautologous Tissue Substitute from Occipital-cervical Joint, Percutaneous Endoscopic Ap | Major spine surgery |
| ORP100Z | ICD-10 Procedure | Removal of Drainage Device from Cervical Vertebral Joint, Open Approach                              | Major spine surgery |
| ORP103Z | ICD-10 Procedure | Removal of Infusion Device from Cervical Vertebral Joint, Open Approach                              | Major spine surgery |
| ORP104Z | ICD-10 Procedure | Removal of Internal Fixation Device from Cervical Vertebral Joint, Open Approach                     | Major spine surgery |
| ORP107Z | ICD-10 Procedure | Removal of Autologous Tissue Substitute from Cervical Vertebral Joint, Open Approach                 | Major spine surgery |
| ORP108Z | ICD-10 Procedure | Removal of Spacer from Cervical Vertebral Joint, Open Approach                                       | Major spine surgery |
| ORP10AZ | ICD-10 Procedure | Removal of Interbody Fusion Device from Cervical Vertebral Joint, Open Approach                      | Major spine surgery |
| ORP10JZ | ICD-10 Procedure | Removal of Synthetic Substitute from Cervical Vertebral Joint, Open Approach                         | Major spine surgery |
| ORP10KZ | ICD-10 Procedure | Removal of Nonautologous Tissue Substitute from Cervical Vertebral Joint, Open Approach              | Major spine surgery |
| ORP130Z | ICD-10 Procedure | Removal of Drainage Device from Cervical Vertebral Joint, Percutaneous Approach                      | Major spine surgery |
| ORP133Z | ICD-10 Procedure | Removal of Infusion Device from Cervical Vertebral Joint, Percutaneous Approach                      | Major spine surgery |
| ORP134Z | ICD-10 Procedure | Removal of Internal Fixation Device from Cervical Vertebral Joint, Percutaneous Approach             | Major spine surgery |
| ORP137Z | ICD-10 Procedure | Removal of Autologous Tissue Substitute from Cervical Vertebral Joint, Percutaneous Approach         | Major spine surgery |
| ORP138Z | ICD-10 Procedure | Removal of Spacer from Cervical Vertebral Joint, Percutaneous Approach                               | Major spine surgery |
| ORP13AZ | ICD-10 Procedure | Removal of Interbody Fusion Device from Cervical Vertebral Joint, Percutaneous Approach              | Major spine surgery |
| ORP13JZ | ICD-10 Procedure | Removal of Synthetic Substitute from Cervical Vertebral Joint, Percutaneous Approach                 | Major spine surgery |



|         |                  |                                                                                                      |                     |
|---------|------------------|------------------------------------------------------------------------------------------------------|---------------------|
| ORP13KZ | ICD-10 Procedure | Removal of Nonautologous Tissue Substitute from Cervical Vertebral Joint, Percutaneous Approach      | Major spine surgery |
| ORP140Z | ICD-10 Procedure | Removal of Drainage Device from Cervical Vertebral Joint, Percutaneous Endoscopic Approach           | Major spine surgery |
| ORP143Z | ICD-10 Procedure | Removal of Infusion Device from Cervical Vertebral Joint, Percutaneous Endoscopic Approach           | Major spine surgery |
| ORP144Z | ICD-10 Procedure | Removal of Internal Fixation Device from Cervical Vertebral Joint, Percutaneous Endoscopic Approach  | Major spine surgery |
| ORP147Z | ICD-10 Procedure | Removal of Autologous Tissue Substitute from Cervical Vertebral Joint, Percutaneous Endoscopic Appro | Major spine surgery |
| ORP148Z | ICD-10 Procedure | Removal of Spacer from Cervical Vertebral Joint, Percutaneous Endoscopic Approach                    | Major spine surgery |
| ORP14AZ | ICD-10 Procedure | Removal of Interbody Fusion Device from Cervical Vertebral Joint, Percutaneous Endoscopic Approach   | Major spine surgery |
| ORP14JZ | ICD-10 Procedure | Removal of Synthetic Substitute from Cervical Vertebral Joint, Percutaneous Endoscopic Approach      | Major spine surgery |
| ORP14KZ | ICD-10 Procedure | Removal of Nonautologous Tissue Substitute from Cervical Vertebral Joint, Percutaneous Endoscopic Ap | Major spine surgery |
| ORP300Z | ICD-10 Procedure | Removal of Drainage Device from Cervical Vertebral Disc, Open Approach                               | Major spine surgery |
| ORP303Z | ICD-10 Procedure | Removal of Infusion Device from Cervical Vertebral Disc, Open Approach                               | Major spine surgery |
| ORP307Z | ICD-10 Procedure | Removal of Autologous Tissue Substitute from Cervical Vertebral Disc, Open Approach                  | Major spine surgery |
| ORP30JZ | ICD-10 Procedure | Removal of Synthetic Substitute from Cervical Vertebral Disc, Open Approach                          | Major spine surgery |
| ORP30KZ | ICD-10 Procedure | Removal of Nonautologous Tissue Substitute from Cervical Vertebral Disc, Open Approach               | Major spine surgery |
| ORP330Z | ICD-10 Procedure | Removal of Drainage Device from Cervical Vertebral Disc, Percutaneous Approach                       | Major spine surgery |

|         |                  |                                                                                                           |                     |
|---------|------------------|-----------------------------------------------------------------------------------------------------------|---------------------|
| ORP333Z | ICD-10 Procedure | Removal of Infusion Device from Cervical Vertebral Disc, Percutaneous Approach                            | Major spine surgery |
| ORP337Z | ICD-10 Procedure | Removal of Autologous Tissue Substitute from Cervical Vertebral Disc, Percutaneous Approach               | Major spine surgery |
| ORP33JZ | ICD-10 Procedure | Removal of Synthetic Substitute from Cervical Vertebral Disc, Percutaneous Approach                       | Major spine surgery |
| ORP33KZ | ICD-10 Procedure | Removal of Nonautologous Tissue Substitute from Cervical Vertebral Disc, Percutaneous Approach            | Major spine surgery |
| ORP340Z | ICD-10 Procedure | Removal of Drainage Device from Cervical Vertebral Disc, Percutaneous Endoscopic Approach                 | Major spine surgery |
| ORP343Z | ICD-10 Procedure | Removal of Infusion Device from Cervical Vertebral Disc, Percutaneous Endoscopic Approach                 | Major spine surgery |
| ORP347Z | ICD-10 Procedure | Removal of Autologous Tissue Substitute from Cervical Vertebral Disc, Percutaneous Endoscopic Approach    | Major spine surgery |
| ORP34JZ | ICD-10 Procedure | Removal of Synthetic Substitute from Cervical Vertebral Disc, Percutaneous Endoscopic Approach            | Major spine surgery |
| ORP34KZ | ICD-10 Procedure | Removal of Nonautologous Tissue Substitute from Cervical Vertebral Disc, Percutaneous Endoscopic Approach | Major spine surgery |
| ORP400Z | ICD-10 Procedure | Removal of Drainage Device from Cervicothoracic Vertebral Joint, Open Approach                            | Major spine surgery |
| ORP403Z | ICD-10 Procedure | Removal of Infusion Device from Cervicothoracic Vertebral Joint, Open Approach                            | Major spine surgery |
| ORP404Z | ICD-10 Procedure | Removal of Internal Fixation Device from Cervicothoracic Vertebral Joint, Open Approach                   | Major spine surgery |
| ORP407Z | ICD-10 Procedure | Removal of Autologous Tissue Substitute from Cervicothoracic Vertebral Joint, Open Approach               | Major spine surgery |
| ORP408Z | ICD-10 Procedure | Removal of Spacer from Cervicothoracic Vertebral Joint, Open Approach                                     | Major spine surgery |
| ORP40AZ | ICD-10 Procedure | Removal of Interbody Fusion Device from Cervicothoracic Vertebral Joint, Open Approach                    | Major spine surgery |

|         |                  |                                                                                                                |                     |
|---------|------------------|----------------------------------------------------------------------------------------------------------------|---------------------|
| ORP40JZ | ICD-10 Procedure | Removal of Synthetic Substitute from Cervicothoracic Vertebral Joint, Open Approach                            | Major spine surgery |
| ORP40KZ | ICD-10 Procedure | Removal of Nonautologous Tissue Substitute from Cervicothoracic Vertebral Joint, Open Approach                 | Major spine surgery |
| ORP430Z | ICD-10 Procedure | Removal of Drainage Device from Cervicothoracic Vertebral Joint, Percutaneous Approach                         | Major spine surgery |
| ORP433Z | ICD-10 Procedure | Removal of Infusion Device from Cervicothoracic Vertebral Joint, Percutaneous Approach                         | Major spine surgery |
| ORP434Z | ICD-10 Procedure | Removal of Internal Fixation Device from Cervicothoracic Vertebral Joint, Percutaneous Approach                | Major spine surgery |
| ORP437Z | ICD-10 Procedure | Removal of Autologous Tissue Substitute from Cervicothoracic Vertebral Joint, Percutaneous Approach            | Major spine surgery |
| ORP438Z | ICD-10 Procedure | Removal of Spacer from Cervicothoracic Vertebral Joint, Percutaneous Approach                                  | Major spine surgery |
| ORP43AZ | ICD-10 Procedure | Removal of Interbody Fusion Device from Cervicothoracic Vertebral Joint, Percutaneous Approach                 | Major spine surgery |
| ORP43JZ | ICD-10 Procedure | Removal of Synthetic Substitute from Cervicothoracic Vertebral Joint, Percutaneous Approach                    | Major spine surgery |
| ORP43KZ | ICD-10 Procedure | Removal of Nonautologous Tissue Substitute from Cervicothoracic Vertebral Joint, Percutaneous Approach         | Major spine surgery |
| ORP440Z | ICD-10 Procedure | Removal of Drainage Device from Cervicothoracic Vertebral Joint, Percutaneous Endoscopic Approach              | Major spine surgery |
| ORP443Z | ICD-10 Procedure | Removal of Infusion Device from Cervicothoracic Vertebral Joint, Percutaneous Endoscopic Approach              | Major spine surgery |
| ORP444Z | ICD-10 Procedure | Removal of Internal Fixation Device from Cervicothoracic Vertebral Joint, Percutaneous Endoscopic Approach     | Major spine surgery |
| ORP447Z | ICD-10 Procedure | Removal of Autologous Tissue Substitute from Cervicothoracic Vertebral Joint, Percutaneous Endoscopic Approach | Major spine surgery |

|         |                  |                                                                                                      |                     |
|---------|------------------|------------------------------------------------------------------------------------------------------|---------------------|
| ORP448Z | ICD-10 Procedure | Removal of Spacer from Cervicothoracic Vertebral Joint, Percutaneous Endoscopic Approach             | Major spine surgery |
| ORP44AZ | ICD-10 Procedure | Removal of Interbody Fusion Device from Cervicothoracic Vertebral Joint, Percutaneous Endoscopic App | Major spine surgery |
| ORP44JZ | ICD-10 Procedure | Removal of Synthetic Substitute from Cervicothoracic Vertebral Joint, Percutaneous Endoscopic Approa | Major spine surgery |
| ORP44KZ | ICD-10 Procedure | Removal of Nonautologous Tissue Substitute from Cervicothoracic Vertebral Joint, Percutaneous Endosc | Major spine surgery |
| ORP500Z | ICD-10 Procedure | Removal of Drainage Device from Cervicothoracic Vertebral Disc, Open Approach                        | Major spine surgery |
| ORP503Z | ICD-10 Procedure | Removal of Infusion Device from Cervicothoracic Vertebral Disc, Open Approach                        | Major spine surgery |
| ORP507Z | ICD-10 Procedure | Removal of Autologous Tissue Substitute from Cervicothoracic Vertebral Disc, Open Approach           | Major spine surgery |
| ORP50JZ | ICD-10 Procedure | Removal of Synthetic Substitute from Cervicothoracic Vertebral Disc, Open Approach                   | Major spine surgery |
| ORP50KZ | ICD-10 Procedure | Removal of Nonautologous Tissue Substitute from Cervicothoracic Vertebral Disc, Open Approach        | Major spine surgery |
| ORP530Z | ICD-10 Procedure | Removal of Drainage Device from Cervicothoracic Vertebral Disc, Percutaneous Approach                | Major spine surgery |
| ORP533Z | ICD-10 Procedure | Removal of Infusion Device from Cervicothoracic Vertebral Disc, Percutaneous Approach                | Major spine surgery |
| ORP537Z | ICD-10 Procedure | Removal of Autologous Tissue Substitute from Cervicothoracic Vertebral Disc, Percutaneous Approach   | Major spine surgery |
| ORP53JZ | ICD-10 Procedure | Removal of Synthetic Substitute from Cervicothoracic Vertebral Disc, Percutaneous Approach           | Major spine surgery |
| ORP53KZ | ICD-10 Procedure | Removal of Nonautologous Tissue Substitute from Cervicothoracic Vertebral Disc, Percutaneous Approac | Major spine surgery |

|         |                  |                                                                                                      |                     |
|---------|------------------|------------------------------------------------------------------------------------------------------|---------------------|
| ORP540Z | ICD-10 Procedure | Removal of Drainage Device from Cervicothoracic Vertebral Disc, Percutaneous Endoscopic Approach     | Major spine surgery |
| ORP543Z | ICD-10 Procedure | Removal of Infusion Device from Cervicothoracic Vertebral Disc, Percutaneous Endoscopic Approach     | Major spine surgery |
| ORP547Z | ICD-10 Procedure | Removal of Autologous Tissue Substitute from Cervicothoracic Vertebral Disc, Percutaneous Endoscopic | Major spine surgery |
| ORP54JZ | ICD-10 Procedure | Removal of Synthetic Substitute from Cervicothoracic Vertebral Disc, Percutaneous Endoscopic Approac | Major spine surgery |
| ORP54KZ | ICD-10 Procedure | Removal of Nonautologous Tissue Substitute from Cervicothoracic Vertebral Disc, Percutaneous Endosco | Major spine surgery |
| ORP600Z | ICD-10 Procedure | Removal of Drainage Device from Thoracic Vertebral Joint, Open Approach                              | Major spine surgery |
| ORP603Z | ICD-10 Procedure | Removal of Infusion Device from Thoracic Vertebral Joint, Open Approach                              | Major spine surgery |
| ORP604Z | ICD-10 Procedure | Removal of Internal Fixation Device from Thoracic Vertebral Joint, Open Approach                     | Major spine surgery |
| ORP607Z | ICD-10 Procedure | Removal of Autologous Tissue Substitute from Thoracic Vertebral Joint, Open Approach                 | Major spine surgery |
| ORP608Z | ICD-10 Procedure | Removal of Spacer from Thoracic Vertebral Joint, Open Approach                                       | Major spine surgery |
| ORP60AZ | ICD-10 Procedure | Removal of Interbody Fusion Device from Thoracic Vertebral Joint, Open Approach                      | Major spine surgery |
| ORP60JZ | ICD-10 Procedure | Removal of Synthetic Substitute from Thoracic Vertebral Joint, Open Approach                         | Major spine surgery |
| ORP60KZ | ICD-10 Procedure | Removal of Nonautologous Tissue Substitute from Thoracic Vertebral Joint, Open Approach              | Major spine surgery |
| ORP630Z | ICD-10 Procedure | Removal of Drainage Device from Thoracic Vertebral Joint, Percutaneous Approach                      | Major spine surgery |
| ORP633Z | ICD-10 Procedure | Removal of Infusion Device from Thoracic Vertebral Joint, Percutaneous Approach                      | Major spine surgery |

|         |                  |                                                                                                            |                     |
|---------|------------------|------------------------------------------------------------------------------------------------------------|---------------------|
| ORP634Z | ICD-10 Procedure | Removal of Internal Fixation Device from Thoracic Vertebral Joint, Percutaneous Approach                   | Major spine surgery |
| ORP637Z | ICD-10 Procedure | Removal of Autologous Tissue Substitute from Thoracic Vertebral Joint, Percutaneous Approach               | Major spine surgery |
| ORP638Z | ICD-10 Procedure | Removal of Spacer from Thoracic Vertebral Joint, Percutaneous Approach                                     | Major spine surgery |
| ORP63AZ | ICD-10 Procedure | Removal of Interbody Fusion Device from Thoracic Vertebral Joint, Percutaneous Approach                    | Major spine surgery |
| ORP63JZ | ICD-10 Procedure | Removal of Synthetic Substitute from Thoracic Vertebral Joint, Percutaneous Approach                       | Major spine surgery |
| ORP63KZ | ICD-10 Procedure | Removal of Nonautologous Tissue Substitute from Thoracic Vertebral Joint, Percutaneous Approach            | Major spine surgery |
| ORP640Z | ICD-10 Procedure | Removal of Drainage Device from Thoracic Vertebral Joint, Percutaneous Endoscopic Approach                 | Major spine surgery |
| ORP643Z | ICD-10 Procedure | Removal of Infusion Device from Thoracic Vertebral Joint, Percutaneous Endoscopic Approach                 | Major spine surgery |
| ORP644Z | ICD-10 Procedure | Removal of Internal Fixation Device from Thoracic Vertebral Joint, Percutaneous Endoscopic Approach        | Major spine surgery |
| ORP647Z | ICD-10 Procedure | Removal of Autologous Tissue Substitute from Thoracic Vertebral Joint, Percutaneous Endoscopic Approach    | Major spine surgery |
| ORP648Z | ICD-10 Procedure | Removal of Spacer from Thoracic Vertebral Joint, Percutaneous Endoscopic Approach                          | Major spine surgery |
| ORP64AZ | ICD-10 Procedure | Removal of Interbody Fusion Device from Thoracic Vertebral Joint, Percutaneous Endoscopic Approach         | Major spine surgery |
| ORP64JZ | ICD-10 Procedure | Removal of Synthetic Substitute from Thoracic Vertebral Joint, Percutaneous Endoscopic Approach            | Major spine surgery |
| ORP64KZ | ICD-10 Procedure | Removal of Nonautologous Tissue Substitute from Thoracic Vertebral Joint, Percutaneous Endoscopic Approach | Major spine surgery |
| ORP900Z | ICD-10 Procedure | Removal of Drainage Device from Thoracic Vertebral Disc, Open Approach                                     | Major spine surgery |

|         |                  |                                                                                                           |                     |
|---------|------------------|-----------------------------------------------------------------------------------------------------------|---------------------|
| ORP903Z | ICD-10 Procedure | Removal of Infusion Device from Thoracic Vertebral Disc, Open Approach                                    | Major spine surgery |
| ORP907Z | ICD-10 Procedure | Removal of Autologous Tissue Substitute from Thoracic Vertebral Disc, Open Approach                       | Major spine surgery |
| ORP90JZ | ICD-10 Procedure | Removal of Synthetic Substitute from Thoracic Vertebral Disc, Open Approach                               | Major spine surgery |
| ORP90KZ | ICD-10 Procedure | Removal of Nonautologous Tissue Substitute from Thoracic Vertebral Disc, Open Approach                    | Major spine surgery |
| ORP930Z | ICD-10 Procedure | Removal of Drainage Device from Thoracic Vertebral Disc, Percutaneous Approach                            | Major spine surgery |
| ORP933Z | ICD-10 Procedure | Removal of Infusion Device from Thoracic Vertebral Disc, Percutaneous Approach                            | Major spine surgery |
| ORP937Z | ICD-10 Procedure | Removal of Autologous Tissue Substitute from Thoracic Vertebral Disc, Percutaneous Approach               | Major spine surgery |
| ORP93JZ | ICD-10 Procedure | Removal of Synthetic Substitute from Thoracic Vertebral Disc, Percutaneous Approach                       | Major spine surgery |
| ORP93KZ | ICD-10 Procedure | Removal of Nonautologous Tissue Substitute from Thoracic Vertebral Disc, Percutaneous Approach            | Major spine surgery |
| ORP940Z | ICD-10 Procedure | Removal of Drainage Device from Thoracic Vertebral Disc, Percutaneous Endoscopic Approach                 | Major spine surgery |
| ORP943Z | ICD-10 Procedure | Removal of Infusion Device from Thoracic Vertebral Disc, Percutaneous Endoscopic Approach                 | Major spine surgery |
| ORP947Z | ICD-10 Procedure | Removal of Autologous Tissue Substitute from Thoracic Vertebral Disc, Percutaneous Endoscopic Approach    | Major spine surgery |
| ORP94JZ | ICD-10 Procedure | Removal of Synthetic Substitute from Thoracic Vertebral Disc, Percutaneous Endoscopic Approach            | Major spine surgery |
| ORP94KZ | ICD-10 Procedure | Removal of Nonautologous Tissue Substitute from Thoracic Vertebral Disc, Percutaneous Endoscopic Approach | Major spine surgery |
| ORPA00Z | ICD-10 Procedure | Removal of Drainage Device from Thoracolumbar Vertebral Joint, Open Approach                              | Major spine surgery |

|         |                  |                                                                                                   |                     |
|---------|------------------|---------------------------------------------------------------------------------------------------|---------------------|
| ORPA03Z | ICD-10 Procedure | Removal of Infusion Device from Thoracolumbar Vertebral Joint, Open Approach                      | Major spine surgery |
| ORPA04Z | ICD-10 Procedure | Removal of Internal Fixation Device from Thoracolumbar Vertebral Joint, Open Approach             | Major spine surgery |
| ORPA07Z | ICD-10 Procedure | Removal of Autologous Tissue Substitute from Thoracolumbar Vertebral Joint, Open Approach         | Major spine surgery |
| ORPA08Z | ICD-10 Procedure | Removal of Spacer from Thoracolumbar Vertebral Joint, Open Approach                               | Major spine surgery |
| ORPA0AZ | ICD-10 Procedure | Removal of Interbody Fusion Device from Thoracolumbar Vertebral Joint, Open Approach              | Major spine surgery |
| ORPA0JZ | ICD-10 Procedure | Removal of Synthetic Substitute from Thoracolumbar Vertebral Joint, Open Approach                 | Major spine surgery |
| ORPA30Z | ICD-10 Procedure | Removal of Drainage Device from Thoracolumbar Vertebral Joint, Percutaneous Approach              | Major spine surgery |
| ORPA33Z | ICD-10 Procedure | Removal of Infusion Device from Thoracolumbar Vertebral Joint, Percutaneous Approach              | Major spine surgery |
| ORPA34Z | ICD-10 Procedure | Removal of Internal Fixation Device from Thoracolumbar Vertebral Joint, Percutaneous Approach     | Major spine surgery |
| ORPA37Z | ICD-10 Procedure | Removal of Autologous Tissue Substitute from Thoracolumbar Vertebral Joint, Percutaneous Approach | Major spine surgery |
| ORPA38Z | ICD-10 Procedure | Removal of Spacer from Thoracolumbar Vertebral Joint, Percutaneous Approach                       | Major spine surgery |
| ORPA3AZ | ICD-10 Procedure | Removal of Interbody Fusion Device from Thoracolumbar Vertebral Joint, Percutaneous Approach      | Major spine surgery |
| ORPA3JZ | ICD-10 Procedure | Removal of Synthetic Substitute from Thoracolumbar Vertebral Joint, Percutaneous Approach         | Major spine surgery |
| ORPA40Z | ICD-10 Procedure | Removal of Drainage Device from Thoracolumbar Vertebral Joint, Percutaneous Endoscopic Approach   | Major spine surgery |
| ORPA43Z | ICD-10 Procedure | Removal of Infusion Device from Thoracolumbar Vertebral Joint, Percutaneous Endoscopic Approach   | Major spine surgery |



|         |                  |                                                                                                      |                     |
|---------|------------------|------------------------------------------------------------------------------------------------------|---------------------|
| ORPA44Z | ICD-10 Procedure | Removal of Internal Fixation Device from Thoracolumbar Vertebral Joint, Percutaneous Endoscopic Appr | Major spine surgery |
| ORPA47Z | ICD-10 Procedure | Removal of Autologous Tissue Substitute from Thoracolumbar Vertebral Joint, Percutaneous Endoscopic  | Major spine surgery |
| ORPA48Z | ICD-10 Procedure | Removal of Spacer from Thoracolumbar Vertebral Joint, Percutaneous Endoscopic Approach               | Major spine surgery |
| ORPA4AZ | ICD-10 Procedure | Removal of Interbody Fusion Device from Thoracolumbar Vertebral Joint, Percutaneous Endoscopic Appro | Major spine surgery |
| ORPA4JZ | ICD-10 Procedure | Removal of Synthetic Substitute from Thoracolumbar Vertebral Joint, Percutaneous Endoscopic Approach | Major spine surgery |
| ORPB00Z | ICD-10 Procedure | Removal of Drainage Device from Thoracolumbar Vertebral Disc, Open Approach                          | Major spine surgery |
| ORPB03Z | ICD-10 Procedure | Removal of Infusion Device from Thoracolumbar Vertebral Disc, Open Approach                          | Major spine surgery |
| ORPB07Z | ICD-10 Procedure | Removal of Autologous Tissue Substitute from Thoracolumbar Vertebral Disc, Open Approach             | Major spine surgery |
| ORPB0JZ | ICD-10 Procedure | Removal of Synthetic Substitute from Thoracolumbar Vertebral Disc, Open Approach                     | Major spine surgery |
| ORPB0KZ | ICD-10 Procedure | Removal of Nonautologous Tissue Substitute from Thoracolumbar Vertebral Disc, Open Approach          | Major spine surgery |
| ORPB30Z | ICD-10 Procedure | Removal of Drainage Device from Thoracolumbar Vertebral Disc, Percutaneous Approach                  | Major spine surgery |
| ORPB33Z | ICD-10 Procedure | Removal of Infusion Device from Thoracolumbar Vertebral Disc, Percutaneous Approach                  | Major spine surgery |
| ORPB37Z | ICD-10 Procedure | Removal of Autologous Tissue Substitute from Thoracolumbar Vertebral Disc, Percutaneous Approach     | Major spine surgery |
| ORPB3JZ | ICD-10 Procedure | Removal of Synthetic Substitute from Thoracolumbar Vertebral Disc, Percutaneous Approach             | Major spine surgery |

|         |                  |                                                                                                      |                     |
|---------|------------------|------------------------------------------------------------------------------------------------------|---------------------|
| ORPB3KZ | ICD-10 Procedure | Removal of Nonautologous Tissue Substitute from Thoracolumbar Vertebral Disc, Percutaneous Approach  | Major spine surgery |
| ORPB40Z | ICD-10 Procedure | Removal of Drainage Device from Thoracolumbar Vertebral Disc, Percutaneous Endoscopic Approach       | Major spine surgery |
| ORPB43Z | ICD-10 Procedure | Removal of Infusion Device from Thoracolumbar Vertebral Disc, Percutaneous Endoscopic Approach       | Major spine surgery |
| ORPB47Z | ICD-10 Procedure | Removal of Autologous Tissue Substitute from Thoracolumbar Vertebral Disc, Percutaneous Endoscopic A | Major spine surgery |
| ORPB4JZ | ICD-10 Procedure | Removal of Synthetic Substitute from Thoracolumbar Vertebral Disc, Percutaneous Endoscopic Approach  | Major spine surgery |
| ORPB4KZ | ICD-10 Procedure | Removal of Nonautologous Tissue Substitute from Thoracolumbar Vertebral Disc, Percutaneous Endoscopi | Major spine surgery |
| ORS004Z | ICD-10 Procedure | Reposition Occipital-cervical Joint with Internal Fixation Device, Open Approach                     | Major spine surgery |
| ORS00ZZ | ICD-10 Procedure | Reposition Occipital-cervical Joint, Open Approach                                                   | Major spine surgery |
| ORS034Z | ICD-10 Procedure | Reposition Occipital-cervical Joint with Internal Fixation Device, Percutaneous Approach             | Major spine surgery |
| ORS03ZZ | ICD-10 Procedure | Reposition Occipital-cervical Joint, Percutaneous Approach                                           | Major spine surgery |
| ORS044Z | ICD-10 Procedure | Reposition Occipital-cervical Joint with Internal Fixation Device, Percutaneous Endoscopic Approach  | Major spine surgery |
| ORS04ZZ | ICD-10 Procedure | Reposition Occipital-cervical Joint, Percutaneous Endoscopic Approach                                | Major spine surgery |
| ORSOX4Z | ICD-10 Procedure | Reposition Occipital-cervical Joint with Internal Fixation Device, External Approach                 | Major spine surgery |
| ORSOXZZ | ICD-10 Procedure | Reposition Occipital-cervical Joint, External Approach                                               | Major spine surgery |
| ORS104Z | ICD-10 Procedure | Reposition Cervical Vertebral Joint with Internal Fixation Device, Open Approach                     | Major spine surgery |
| ORS10ZZ | ICD-10 Procedure | Reposition Cervical Vertebral Joint, Open Approach                                                   | Major spine surgery |

|         |                  |                                                                                                      |                     |
|---------|------------------|------------------------------------------------------------------------------------------------------|---------------------|
| ORS134Z | ICD-10 Procedure | Reposition Cervical Vertebral Joint with Internal Fixation Device, Percutaneous Approach             | Major spine surgery |
| ORS13ZZ | ICD-10 Procedure | Reposition Cervical Vertebral Joint, Percutaneous Approach                                           | Major spine surgery |
| ORS144Z | ICD-10 Procedure | Reposition Cervical Vertebral Joint with Internal Fixation Device, Percutaneous Endoscopic Approach  | Major spine surgery |
| ORS14ZZ | ICD-10 Procedure | Reposition Cervical Vertebral Joint, Percutaneous Endoscopic Approach                                | Major spine surgery |
| ORS1X4Z | ICD-10 Procedure | Reposition Cervical Vertebral Joint with Internal Fixation Device, External Approach                 | Major spine surgery |
| ORS1XZZ | ICD-10 Procedure | Reposition Cervical Vertebral Joint, External Approach                                               | Major spine surgery |
| ORS404Z | ICD-10 Procedure | Reposition Cervicothoracic Vertebral Joint with Internal Fixation Device, Open Approach              | Major spine surgery |
| ORS40ZZ | ICD-10 Procedure | Reposition Cervicothoracic Vertebral Joint, Open Approach                                            | Major spine surgery |
| ORS434Z | ICD-10 Procedure | Reposition Cervicothoracic Vertebral Joint with Internal Fixation Device, Percutaneous Approach      | Major spine surgery |
| ORS43ZZ | ICD-10 Procedure | Reposition Cervicothoracic Vertebral Joint, Percutaneous Approach                                    | Major spine surgery |
| ORS444Z | ICD-10 Procedure | Reposition Cervicothoracic Vertebral Joint with Internal Fixation Device, Percutaneous Endoscopic Ap | Major spine surgery |
| ORS44ZZ | ICD-10 Procedure | Reposition Cervicothoracic Vertebral Joint, Percutaneous Endoscopic Approach                         | Major spine surgery |
| ORS4X4Z | ICD-10 Procedure | Reposition Cervicothoracic Vertebral Joint with Internal Fixation Device, External Approach          | Major spine surgery |
| ORS4XZZ | ICD-10 Procedure | Reposition Cervicothoracic Vertebral Joint, External Approach                                        | Major spine surgery |
| ORS604Z | ICD-10 Procedure | Reposition Thoracic Vertebral Joint with Internal Fixation Device, Open Approach                     | Major spine surgery |
| ORS60ZZ | ICD-10 Procedure | Reposition Thoracic Vertebral Joint, Open Approach                                                   | Major spine surgery |
| ORS634Z | ICD-10 Procedure | Reposition Thoracic Vertebral Joint with Internal Fixation Device, Percutaneous Approach             | Major spine surgery |

|         |                  |                                                                                                      |                     |
|---------|------------------|------------------------------------------------------------------------------------------------------|---------------------|
| ORS63ZZ | ICD-10 Procedure | Reposition Thoracic Vertebral Joint, Percutaneous Approach                                           | Major spine surgery |
| ORS644Z | ICD-10 Procedure | Reposition Thoracic Vertebral Joint with Internal Fixation Device, Percutaneous Endoscopic Approach  | Major spine surgery |
| ORS64ZZ | ICD-10 Procedure | Reposition Thoracic Vertebral Joint, Percutaneous Endoscopic Approach                                | Major spine surgery |
| ORS6X4Z | ICD-10 Procedure | Reposition Thoracic Vertebral Joint with Internal Fixation Device, External Approach                 | Major spine surgery |
| ORS6XZZ | ICD-10 Procedure | Reposition Thoracic Vertebral Joint, External Approach                                               | Major spine surgery |
| ORSA04Z | ICD-10 Procedure | Reposition Thoracolumbar Vertebral Joint with Internal Fixation Device, Open Approach                | Major spine surgery |
| ORSA0ZZ | ICD-10 Procedure | Reposition Thoracolumbar Vertebral Joint, Open Approach                                              | Major spine surgery |
| ORSA34Z | ICD-10 Procedure | Reposition Thoracolumbar Vertebral Joint with Internal Fixation Device, Percutaneous Approach        | Major spine surgery |
| ORSA3ZZ | ICD-10 Procedure | Reposition Thoracolumbar Vertebral Joint, Percutaneous Approach                                      | Major spine surgery |
| ORSA44Z | ICD-10 Procedure | Reposition Thoracolumbar Vertebral Joint with Internal Fixation Device, Percutaneous Endoscopic Appr | Major spine surgery |
| ORSA4ZZ | ICD-10 Procedure | Reposition Thoracolumbar Vertebral Joint, Percutaneous Endoscopic Approach                           | Major spine surgery |
| ORSAX4Z | ICD-10 Procedure | Reposition Thoracolumbar Vertebral Joint with Internal Fixation Device, External Approach            | Major spine surgery |
| ORSAXZZ | ICD-10 Procedure | Reposition Thoracolumbar Vertebral Joint, External Approach                                          | Major spine surgery |
| ORW000Z | ICD-10 Procedure | Revision of Drainage Device in Occipital-cervical Joint, Open Approach                               | Major spine surgery |
| ORW003Z | ICD-10 Procedure | Revision of Infusion Device in Occipital-cervical Joint, Open Approach                               | Major spine surgery |
| ORW004Z | ICD-10 Procedure | Revision of Internal Fixation Device in Occipital-cervical Joint, Open Approach                      | Major spine surgery |

|         |                  |                                                                                                    |                     |
|---------|------------------|----------------------------------------------------------------------------------------------------|---------------------|
| ORW007Z | ICD-10 Procedure | Revision of Autologous Tissue Substitute in Occipital-cervical Joint, Open Approach                | Major spine surgery |
| ORW008Z | ICD-10 Procedure | Revision of Spacer in Occipital-cervical Joint, Open Approach                                      | Major spine surgery |
| ORW00AZ | ICD-10 Procedure | Revision of Interbody Fusion Device in Occipital-cervical Joint, Open Approach                     | Major spine surgery |
| ORW00JZ | ICD-10 Procedure | Revision of Synthetic Substitute in Occipital-cervical Joint, Open Approach                        | Major spine surgery |
| ORW00KZ | ICD-10 Procedure | Revision of Nonautologous Tissue Substitute in Occipital-cervical Joint, Open Approach             | Major spine surgery |
| ORW030Z | ICD-10 Procedure | Revision of Drainage Device in Occipital-cervical Joint, Percutaneous Approach                     | Major spine surgery |
| ORW033Z | ICD-10 Procedure | Revision of Infusion Device in Occipital-cervical Joint, Percutaneous Approach                     | Major spine surgery |
| ORW034Z | ICD-10 Procedure | Revision of Internal Fixation Device in Occipital-cervical Joint, Percutaneous Approach            | Major spine surgery |
| ORW037Z | ICD-10 Procedure | Revision of Autologous Tissue Substitute in Occipital-cervical Joint, Percutaneous Approach        | Major spine surgery |
| ORW038Z | ICD-10 Procedure | Revision of Spacer in Occipital-cervical Joint, Percutaneous Approach                              | Major spine surgery |
| ORW03AZ | ICD-10 Procedure | Revision of Interbody Fusion Device in Occipital-cervical Joint, Percutaneous Approach             | Major spine surgery |
| ORW03JZ | ICD-10 Procedure | Revision of Synthetic Substitute in Occipital-cervical Joint, Percutaneous Approach                | Major spine surgery |
| ORW03KZ | ICD-10 Procedure | Revision of Nonautologous Tissue Substitute in Occipital-cervical Joint, Percutaneous Approach     | Major spine surgery |
| ORW040Z | ICD-10 Procedure | Revision of Drainage Device in Occipital-cervical Joint, Percutaneous Endoscopic Approach          | Major spine surgery |
| ORW043Z | ICD-10 Procedure | Revision of Infusion Device in Occipital-cervical Joint, Percutaneous Endoscopic Approach          | Major spine surgery |
| ORW044Z | ICD-10 Procedure | Revision of Internal Fixation Device in Occipital-cervical Joint, Percutaneous Endoscopic Approach | Major spine surgery |

|         |                  |                                                                                                      |                     |
|---------|------------------|------------------------------------------------------------------------------------------------------|---------------------|
| ORW047Z | ICD-10 Procedure | Revision of Autologous Tissue Substitute in Occipital-cervical Joint, Percutaneous Endoscopic Approa | Major spine surgery |
| ORW048Z | ICD-10 Procedure | Revision of Spacer in Occipital-cervical Joint, Percutaneous Endoscopic Approach                     | Major spine surgery |
| ORW04AZ | ICD-10 Procedure | Revision of Interbody Fusion Device in Occipital-cervical Joint, Percutaneous Endoscopic Approach    | Major spine surgery |
| ORW04JZ | ICD-10 Procedure | Revision of Synthetic Substitute in Occipital-cervical Joint, Percutaneous Endoscopic Approach       | Major spine surgery |
| ORW04KZ | ICD-10 Procedure | Revision of Nonautologous Tissue Substitute in Occipital-cervical Joint, Percutaneous Endoscopic App | Major spine surgery |
| ORW0X0Z | ICD-10 Procedure | Revision of Drainage Device in Occipital-cervical Joint, External Approach                           | Major spine surgery |
| ORW0X3Z | ICD-10 Procedure | Revision of Infusion Device in Occipital-cervical Joint, External Approach                           | Major spine surgery |
| ORW0X4Z | ICD-10 Procedure | Revision of Internal Fixation Device in Occipital-cervical Joint, External Approach                  | Major spine surgery |
| ORW0X7Z | ICD-10 Procedure | Revision of Autologous Tissue Substitute in Occipital-cervical Joint, External Approach              | Major spine surgery |
| ORW0X8Z | ICD-10 Procedure | Revision of Spacer in Occipital-cervical Joint, External Approach                                    | Major spine surgery |
| ORW0XAZ | ICD-10 Procedure | Revision of Interbody Fusion Device in Occipital-cervical Joint, External Approach                   | Major spine surgery |
| ORW0XJZ | ICD-10 Procedure | Revision of Synthetic Substitute in Occipital-cervical Joint, External Approach                      | Major spine surgery |
| ORW0XKZ | ICD-10 Procedure | Revision of Nonautologous Tissue Substitute in Occipital-cervical Joint, External Approach           | Major spine surgery |
| ORW100Z | ICD-10 Procedure | Revision of Drainage Device in Cervical Vertebral Joint, Open Approach                               | Major spine surgery |
| ORW103Z | ICD-10 Procedure | Revision of Infusion Device in Cervical Vertebral Joint, Open Approach                               | Major spine surgery |

|         |                  |                                                                                                |                     |
|---------|------------------|------------------------------------------------------------------------------------------------|---------------------|
| ORW104Z | ICD-10 Procedure | Revision of Internal Fixation Device in Cervical Vertebral Joint, Open Approach                | Major spine surgery |
| ORW107Z | ICD-10 Procedure | Revision of Autologous Tissue Substitute in Cervical Vertebral Joint, Open Approach            | Major spine surgery |
| ORW108Z | ICD-10 Procedure | Revision of Spacer in Cervical Vertebral Joint, Open Approach                                  | Major spine surgery |
| ORW10AZ | ICD-10 Procedure | Revision of Interbody Fusion Device in Cervical Vertebral Joint, Open Approach                 | Major spine surgery |
| ORW10JZ | ICD-10 Procedure | Revision of Synthetic Substitute in Cervical Vertebral Joint, Open Approach                    | Major spine surgery |
| ORW10KZ | ICD-10 Procedure | Revision of Nonautologous Tissue Substitute in Cervical Vertebral Joint, Open Approach         | Major spine surgery |
| ORW130Z | ICD-10 Procedure | Revision of Drainage Device in Cervical Vertebral Joint, Percutaneous Approach                 | Major spine surgery |
| ORW133Z | ICD-10 Procedure | Revision of Infusion Device in Cervical Vertebral Joint, Percutaneous Approach                 | Major spine surgery |
| ORW134Z | ICD-10 Procedure | Revision of Internal Fixation Device in Cervical Vertebral Joint, Percutaneous Approach        | Major spine surgery |
| ORW137Z | ICD-10 Procedure | Revision of Autologous Tissue Substitute in Cervical Vertebral Joint, Percutaneous Approach    | Major spine surgery |
| ORW138Z | ICD-10 Procedure | Revision of Spacer in Cervical Vertebral Joint, Percutaneous Approach                          | Major spine surgery |
| ORW13AZ | ICD-10 Procedure | Revision of Interbody Fusion Device in Cervical Vertebral Joint, Percutaneous Approach         | Major spine surgery |
| ORW13JZ | ICD-10 Procedure | Revision of Synthetic Substitute in Cervical Vertebral Joint, Percutaneous Approach            | Major spine surgery |
| ORW13KZ | ICD-10 Procedure | Revision of Nonautologous Tissue Substitute in Cervical Vertebral Joint, Percutaneous Approach | Major spine surgery |
| ORW140Z | ICD-10 Procedure | Revision of Drainage Device in Cervical Vertebral Joint, Percutaneous Endoscopic Approach      | Major spine surgery |
| ORW143Z | ICD-10 Procedure | Revision of Infusion Device in Cervical Vertebral Joint, Percutaneous Endoscopic Approach      | Major spine surgery |

|         |                  |                                                                                                      |                     |
|---------|------------------|------------------------------------------------------------------------------------------------------|---------------------|
| ORW144Z | ICD-10 Procedure | Revision of Internal Fixation Device in Cervical Vertebral Joint, Percutaneous Endoscopic Approach   | Major spine surgery |
| ORW147Z | ICD-10 Procedure | Revision of Autologous Tissue Substitute in Cervical Vertebral Joint, Percutaneous Endoscopic Approa | Major spine surgery |
| ORW148Z | ICD-10 Procedure | Revision of Spacer in Cervical Vertebral Joint, Percutaneous Endoscopic Approach                     | Major spine surgery |
| ORW14AZ | ICD-10 Procedure | Revision of Interbody Fusion Device in Cervical Vertebral Joint, Percutaneous Endoscopic Approach    | Major spine surgery |
| ORW14JZ | ICD-10 Procedure | Revision of Synthetic Substitute in Cervical Vertebral Joint, Percutaneous Endoscopic Approach       | Major spine surgery |
| ORW14KZ | ICD-10 Procedure | Revision of Nonautologous Tissue Substitute in Cervical Vertebral Joint, Percutaneous Endoscopic App | Major spine surgery |
| ORW1X0Z | ICD-10 Procedure | Revision of Drainage Device in Cervical Vertebral Joint, External Approach                           | Major spine surgery |
| ORW1X3Z | ICD-10 Procedure | Revision of Infusion Device in Cervical Vertebral Joint, External Approach                           | Major spine surgery |
| ORW1X4Z | ICD-10 Procedure | Revision of Internal Fixation Device in Cervical Vertebral Joint, External Approach                  | Major spine surgery |
| ORW1X7Z | ICD-10 Procedure | Revision of Autologous Tissue Substitute in Cervical Vertebral Joint, External Approach              | Major spine surgery |
| ORW1X8Z | ICD-10 Procedure | Revision of Spacer in Cervical Vertebral Joint, External Approach                                    | Major spine surgery |
| ORW1XAZ | ICD-10 Procedure | Revision of Interbody Fusion Device in Cervical Vertebral Joint, External Approach                   | Major spine surgery |
| ORW1XJZ | ICD-10 Procedure | Revision of Synthetic Substitute in Cervical Vertebral Joint, External Approach                      | Major spine surgery |
| ORW1XKZ | ICD-10 Procedure | Revision of Nonautologous Tissue Substitute in Cervical Vertebral Joint, External Approach           | Major spine surgery |
| ORW300Z | ICD-10 Procedure | Revision of Drainage Device in Cervical Vertebral Disc, Open Approach                                | Major spine surgery |



|         |                  |                                                                                                          |                     |
|---------|------------------|----------------------------------------------------------------------------------------------------------|---------------------|
| ORW303Z | ICD-10 Procedure | Revision of Infusion Device in Cervical Vertebral Disc, Open Approach                                    | Major spine surgery |
| ORW307Z | ICD-10 Procedure | Revision of Autologous Tissue Substitute in Cervical Vertebral Disc, Open Approach                       | Major spine surgery |
| ORW30JZ | ICD-10 Procedure | Revision of Synthetic Substitute in Cervical Vertebral Disc, Open Approach                               | Major spine surgery |
| ORW30KZ | ICD-10 Procedure | Revision of Nonautologous Tissue Substitute in Cervical Vertebral Disc, Open Approach                    | Major spine surgery |
| ORW330Z | ICD-10 Procedure | Revision of Drainage Device in Cervical Vertebral Disc, Percutaneous Approach                            | Major spine surgery |
| ORW333Z | ICD-10 Procedure | Revision of Infusion Device in Cervical Vertebral Disc, Percutaneous Approach                            | Major spine surgery |
| ORW337Z | ICD-10 Procedure | Revision of Autologous Tissue Substitute in Cervical Vertebral Disc, Percutaneous Approach               | Major spine surgery |
| ORW33JZ | ICD-10 Procedure | Revision of Synthetic Substitute in Cervical Vertebral Disc, Percutaneous Approach                       | Major spine surgery |
| ORW33KZ | ICD-10 Procedure | Revision of Nonautologous Tissue Substitute in Cervical Vertebral Disc, Percutaneous Approach            | Major spine surgery |
| ORW340Z | ICD-10 Procedure | Revision of Drainage Device in Cervical Vertebral Disc, Percutaneous Endoscopic Approach                 | Major spine surgery |
| ORW343Z | ICD-10 Procedure | Revision of Infusion Device in Cervical Vertebral Disc, Percutaneous Endoscopic Approach                 | Major spine surgery |
| ORW347Z | ICD-10 Procedure | Revision of Autologous Tissue Substitute in Cervical Vertebral Disc, Percutaneous Endoscopic Approach    | Major spine surgery |
| ORW34JZ | ICD-10 Procedure | Revision of Synthetic Substitute in Cervical Vertebral Disc, Percutaneous Endoscopic Approach            | Major spine surgery |
| ORW34KZ | ICD-10 Procedure | Revision of Nonautologous Tissue Substitute in Cervical Vertebral Disc, Percutaneous Endoscopic Approach | Major spine surgery |
| ORW3X0Z | ICD-10 Procedure | Revision of Drainage Device in Cervical Vertebral Disc, External Approach                                | Major spine surgery |

|         |                  |                                                                                                |                     |
|---------|------------------|------------------------------------------------------------------------------------------------|---------------------|
| ORW3X3Z | ICD-10 Procedure | Revision of Infusion Device in Cervical Vertebral Disc, External Approach                      | Major spine surgery |
| ORW3X7Z | ICD-10 Procedure | Revision of Autologous Tissue Substitute in Cervical Vertebral Disc, External Approach         | Major spine surgery |
| ORW3XJZ | ICD-10 Procedure | Revision of Synthetic Substitute in Cervical Vertebral Disc, External Approach                 | Major spine surgery |
| ORW3XKZ | ICD-10 Procedure | Revision of Nonautologous Tissue Substitute in Cervical Vertebral Disc, External Approach      | Major spine surgery |
| ORW400Z | ICD-10 Procedure | Revision of Drainage Device in Cervicothoracic Vertebral Joint, Open Approach                  | Major spine surgery |
| ORW403Z | ICD-10 Procedure | Revision of Infusion Device in Cervicothoracic Vertebral Joint, Open Approach                  | Major spine surgery |
| ORW404Z | ICD-10 Procedure | Revision of Internal Fixation Device in Cervicothoracic Vertebral Joint, Open Approach         | Major spine surgery |
| ORW407Z | ICD-10 Procedure | Revision of Autologous Tissue Substitute in Cervicothoracic Vertebral Joint, Open Approach     | Major spine surgery |
| ORW408Z | ICD-10 Procedure | Revision of Spacer in Cervicothoracic Vertebral Joint, Open Approach                           | Major spine surgery |
| ORW40AZ | ICD-10 Procedure | Revision of Interbody Fusion Device in Cervicothoracic Vertebral Joint, Open Approach          | Major spine surgery |
| ORW40JZ | ICD-10 Procedure | Revision of Synthetic Substitute in Cervicothoracic Vertebral Joint, Open Approach             | Major spine surgery |
| ORW40KZ | ICD-10 Procedure | Revision of Nonautologous Tissue Substitute in Cervicothoracic Vertebral Joint, Open Approach  | Major spine surgery |
| ORW430Z | ICD-10 Procedure | Revision of Drainage Device in Cervicothoracic Vertebral Joint, Percutaneous Approach          | Major spine surgery |
| ORW433Z | ICD-10 Procedure | Revision of Infusion Device in Cervicothoracic Vertebral Joint, Percutaneous Approach          | Major spine surgery |
| ORW434Z | ICD-10 Procedure | Revision of Internal Fixation Device in Cervicothoracic Vertebral Joint, Percutaneous Approach | Major spine surgery |

|         |                  |                                                                                                           |                     |
|---------|------------------|-----------------------------------------------------------------------------------------------------------|---------------------|
| ORW437Z | ICD-10 Procedure | Revision of Autologous Tissue Substitute in Cervicothoracic Vertebral Joint, Percutaneous Approach        | Major spine surgery |
| ORW438Z | ICD-10 Procedure | Revision of Spacer in Cervicothoracic Vertebral Joint, Percutaneous Approach                              | Major spine surgery |
| ORW43AZ | ICD-10 Procedure | Revision of Interbody Fusion Device in Cervicothoracic Vertebral Joint, Percutaneous Approach             | Major spine surgery |
| ORW43JZ | ICD-10 Procedure | Revision of Synthetic Substitute in Cervicothoracic Vertebral Joint, Percutaneous Approach                | Major spine surgery |
| ORW43KZ | ICD-10 Procedure | Revision of Nonautologous Tissue Substitute in Cervicothoracic Vertebral Joint, Percutaneous Approach     | Major spine surgery |
| ORW440Z | ICD-10 Procedure | Revision of Drainage Device in Cervicothoracic Vertebral Joint, Percutaneous Endoscopic Approach          | Major spine surgery |
| ORW443Z | ICD-10 Procedure | Revision of Infusion Device in Cervicothoracic Vertebral Joint, Percutaneous Endoscopic Approach          | Major spine surgery |
| ORW444Z | ICD-10 Procedure | Revision of Internal Fixation Device in Cervicothoracic Vertebral Joint, Percutaneous Endoscopic Approach | Major spine surgery |
| ORW447Z | ICD-10 Procedure | Revision of Autologous Tissue Substitute in Cervicothoracic Vertebral Joint, Percutaneous Endoscopic      | Major spine surgery |
| ORW448Z | ICD-10 Procedure | Revision of Spacer in Cervicothoracic Vertebral Joint, Percutaneous Endoscopic Approach                   | Major spine surgery |
| ORW44AZ | ICD-10 Procedure | Revision of Interbody Fusion Device in Cervicothoracic Vertebral Joint, Percutaneous Endoscopic Approach  | Major spine surgery |
| ORW44JZ | ICD-10 Procedure | Revision of Synthetic Substitute in Cervicothoracic Vertebral Joint, Percutaneous Endoscopic Approach     | Major spine surgery |
| ORW44KZ | ICD-10 Procedure | Revision of Nonautologous Tissue Substitute in Cervicothoracic Vertebral Joint, Percutaneous Endoscopic   | Major spine surgery |
| ORW4X0Z | ICD-10 Procedure | Revision of Drainage Device in Cervicothoracic Vertebral Joint, External Approach                         | Major spine surgery |

|         |                  |                                                                                                   |                     |
|---------|------------------|---------------------------------------------------------------------------------------------------|---------------------|
| ORW4X3Z | ICD-10 Procedure | Revision of Infusion Device in Cervicothoracic Vertebral Joint, External Approach                 | Major spine surgery |
| ORW4X4Z | ICD-10 Procedure | Revision of Internal Fixation Device in Cervicothoracic Vertebral Joint, External Approach        | Major spine surgery |
| ORW4X7Z | ICD-10 Procedure | Revision of Autologous Tissue Substitute in Cervicothoracic Vertebral Joint, External Approach    | Major spine surgery |
| ORW4X8Z | ICD-10 Procedure | Revision of Spacer in Cervicothoracic Vertebral Joint, External Approach                          | Major spine surgery |
| ORW4XAZ | ICD-10 Procedure | Revision of Interbody Fusion Device in Cervicothoracic Vertebral Joint, External Approach         | Major spine surgery |
| ORW4XJZ | ICD-10 Procedure | Revision of Synthetic Substitute in Cervicothoracic Vertebral Joint, External Approach            | Major spine surgery |
| ORW4XKZ | ICD-10 Procedure | Revision of Nonautologous Tissue Substitute in Cervicothoracic Vertebral Joint, External Approach | Major spine surgery |
| ORW500Z | ICD-10 Procedure | Revision of Drainage Device in Cervicothoracic Vertebral Disc, Open Approach                      | Major spine surgery |
| ORW503Z | ICD-10 Procedure | Revision of Infusion Device in Cervicothoracic Vertebral Disc, Open Approach                      | Major spine surgery |
| ORW507Z | ICD-10 Procedure | Revision of Autologous Tissue Substitute in Cervicothoracic Vertebral Disc, Open Approach         | Major spine surgery |
| ORW50JZ | ICD-10 Procedure | Revision of Synthetic Substitute in Cervicothoracic Vertebral Disc, Open Approach                 | Major spine surgery |
| ORW50KZ | ICD-10 Procedure | Revision of Nonautologous Tissue Substitute in Cervicothoracic Vertebral Disc, Open Approach      | Major spine surgery |
| ORW530Z | ICD-10 Procedure | Revision of Drainage Device in Cervicothoracic Vertebral Disc, Percutaneous Approach              | Major spine surgery |
| ORW533Z | ICD-10 Procedure | Revision of Infusion Device in Cervicothoracic Vertebral Disc, Percutaneous Approach              | Major spine surgery |
| ORW537Z | ICD-10 Procedure | Revision of Autologous Tissue Substitute in Cervicothoracic Vertebral Disc, Percutaneous Approach | Major spine surgery |

|         |                  |                                                                                                      |                     |
|---------|------------------|------------------------------------------------------------------------------------------------------|---------------------|
| ORW53JZ | ICD-10 Procedure | Revision of Synthetic Substitute in Cervicothoracic Vertebral Disc, Percutaneous Approach            | Major spine surgery |
| ORW53KZ | ICD-10 Procedure | Revision of Nonautologous Tissue Substitute in Cervicothoracic Vertebral Disc, Percutaneous Approach | Major spine surgery |
| ORW540Z | ICD-10 Procedure | Revision of Drainage Device in Cervicothoracic Vertebral Disc, Percutaneous Endoscopic Approach      | Major spine surgery |
| ORW543Z | ICD-10 Procedure | Revision of Infusion Device in Cervicothoracic Vertebral Disc, Percutaneous Endoscopic Approach      | Major spine surgery |
| ORW547Z | ICD-10 Procedure | Revision of Autologous Tissue Substitute in Cervicothoracic Vertebral Disc, Percutaneous Endoscopic  | Major spine surgery |
| ORW54JZ | ICD-10 Procedure | Revision of Synthetic Substitute in Cervicothoracic Vertebral Disc, Percutaneous Endoscopic Approach | Major spine surgery |
| ORW54KZ | ICD-10 Procedure | Revision of Nonautologous Tissue Substitute in Cervicothoracic Vertebral Disc, Percutaneous Endoscop | Major spine surgery |
| ORW5X0Z | ICD-10 Procedure | Revision of Drainage Device in Cervicothoracic Vertebral Disc, External Approach                     | Major spine surgery |
| ORW5X3Z | ICD-10 Procedure | Revision of Infusion Device in Cervicothoracic Vertebral Disc, External Approach                     | Major spine surgery |
| ORW5X7Z | ICD-10 Procedure | Revision of Autologous Tissue Substitute in Cervicothoracic Vertebral Disc, External Approach        | Major spine surgery |
| ORW5XJZ | ICD-10 Procedure | Revision of Synthetic Substitute in Cervicothoracic Vertebral Disc, External Approach                | Major spine surgery |
| ORW5XKZ | ICD-10 Procedure | Revision of Nonautologous Tissue Substitute in Cervicothoracic Vertebral Disc, External Approach     | Major spine surgery |
| ORW600Z | ICD-10 Procedure | Revision of Drainage Device in Thoracic Vertebral Joint, Open Approach                               | Major spine surgery |
| ORW603Z | ICD-10 Procedure | Revision of Infusion Device in Thoracic Vertebral Joint, Open Approach                               | Major spine surgery |

|         |                  |                                                                                                |                     |
|---------|------------------|------------------------------------------------------------------------------------------------|---------------------|
| ORW604Z | ICD-10 Procedure | Revision of Internal Fixation Device in Thoracic Vertebral Joint, Open Approach                | Major spine surgery |
| ORW607Z | ICD-10 Procedure | Revision of Autologous Tissue Substitute in Thoracic Vertebral Joint, Open Approach            | Major spine surgery |
| ORW608Z | ICD-10 Procedure | Revision of Spacer in Thoracic Vertebral Joint, Open Approach                                  | Major spine surgery |
| ORW60AZ | ICD-10 Procedure | Revision of Interbody Fusion Device in Thoracic Vertebral Joint, Open Approach                 | Major spine surgery |
| ORW60JZ | ICD-10 Procedure | Revision of Synthetic Substitute in Thoracic Vertebral Joint, Open Approach                    | Major spine surgery |
| ORW60KZ | ICD-10 Procedure | Revision of Nonautologous Tissue Substitute in Thoracic Vertebral Joint, Open Approach         | Major spine surgery |
| ORW630Z | ICD-10 Procedure | Revision of Drainage Device in Thoracic Vertebral Joint, Percutaneous Approach                 | Major spine surgery |
| ORW633Z | ICD-10 Procedure | Revision of Infusion Device in Thoracic Vertebral Joint, Percutaneous Approach                 | Major spine surgery |
| ORW634Z | ICD-10 Procedure | Revision of Internal Fixation Device in Thoracic Vertebral Joint, Percutaneous Approach        | Major spine surgery |
| ORW637Z | ICD-10 Procedure | Revision of Autologous Tissue Substitute in Thoracic Vertebral Joint, Percutaneous Approach    | Major spine surgery |
| ORW638Z | ICD-10 Procedure | Revision of Spacer in Thoracic Vertebral Joint, Percutaneous Approach                          | Major spine surgery |
| ORW63AZ | ICD-10 Procedure | Revision of Interbody Fusion Device in Thoracic Vertebral Joint, Percutaneous Approach         | Major spine surgery |
| ORW63JZ | ICD-10 Procedure | Revision of Synthetic Substitute in Thoracic Vertebral Joint, Percutaneous Approach            | Major spine surgery |
| ORW63KZ | ICD-10 Procedure | Revision of Nonautologous Tissue Substitute in Thoracic Vertebral Joint, Percutaneous Approach | Major spine surgery |
| ORW640Z | ICD-10 Procedure | Revision of Drainage Device in Thoracic Vertebral Joint, Percutaneous Endoscopic Approach      | Major spine surgery |
| ORW643Z | ICD-10 Procedure | Revision of Infusion Device in Thoracic Vertebral Joint, Percutaneous Endoscopic Approach      | Major spine surgery |

|         |                  |                                                                                                      |                     |
|---------|------------------|------------------------------------------------------------------------------------------------------|---------------------|
| ORW644Z | ICD-10 Procedure | Revision of Internal Fixation Device in Thoracic Vertebral Joint, Percutaneous Endoscopic Approach   | Major spine surgery |
| ORW647Z | ICD-10 Procedure | Revision of Autologous Tissue Substitute in Thoracic Vertebral Joint, Percutaneous Endoscopic Approa | Major spine surgery |
| ORW648Z | ICD-10 Procedure | Revision of Spacer in Thoracic Vertebral Joint, Percutaneous Endoscopic Approach                     | Major spine surgery |
| ORW64AZ | ICD-10 Procedure | Revision of Interbody Fusion Device in Thoracic Vertebral Joint, Percutaneous Endoscopic Approach    | Major spine surgery |
| ORW64JZ | ICD-10 Procedure | Revision of Synthetic Substitute in Thoracic Vertebral Joint, Percutaneous Endoscopic Approach       | Major spine surgery |
| ORW64KZ | ICD-10 Procedure | Revision of Nonautologous Tissue Substitute in Thoracic Vertebral Joint, Percutaneous Endoscopic App | Major spine surgery |
| ORW6X0Z | ICD-10 Procedure | Revision of Drainage Device in Thoracic Vertebral Joint, External Approach                           | Major spine surgery |
| ORW6X3Z | ICD-10 Procedure | Revision of Infusion Device in Thoracic Vertebral Joint, External Approach                           | Major spine surgery |
| ORW6X4Z | ICD-10 Procedure | Revision of Internal Fixation Device in Thoracic Vertebral Joint, External Approach                  | Major spine surgery |
| ORW6X7Z | ICD-10 Procedure | Revision of Autologous Tissue Substitute in Thoracic Vertebral Joint, External Approach              | Major spine surgery |
| ORW6X8Z | ICD-10 Procedure | Revision of Spacer in Thoracic Vertebral Joint, External Approach                                    | Major spine surgery |
| ORW6XAZ | ICD-10 Procedure | Revision of Interbody Fusion Device in Thoracic Vertebral Joint, External Approach                   | Major spine surgery |
| ORW6XJZ | ICD-10 Procedure | Revision of Synthetic Substitute in Thoracic Vertebral Joint, External Approach                      | Major spine surgery |
| ORW6XKZ | ICD-10 Procedure | Revision of Nonautologous Tissue Substitute in Thoracic Vertebral Joint, External Approach           | Major spine surgery |
| ORW900Z | ICD-10 Procedure | Revision of Drainage Device in Thoracic Vertebral Disc, Open Approach                                | Major spine surgery |

|         |                  |                                                                                                          |                     |
|---------|------------------|----------------------------------------------------------------------------------------------------------|---------------------|
| ORW903Z | ICD-10 Procedure | Revision of Infusion Device in Thoracic Vertebral Disc, Open Approach                                    | Major spine surgery |
| ORW907Z | ICD-10 Procedure | Revision of Autologous Tissue Substitute in Thoracic Vertebral Disc, Open Approach                       | Major spine surgery |
| ORW90JZ | ICD-10 Procedure | Revision of Synthetic Substitute in Thoracic Vertebral Disc, Open Approach                               | Major spine surgery |
| ORW90KZ | ICD-10 Procedure | Revision of Nonautologous Tissue Substitute in Thoracic Vertebral Disc, Open Approach                    | Major spine surgery |
| ORW930Z | ICD-10 Procedure | Revision of Drainage Device in Thoracic Vertebral Disc, Percutaneous Approach                            | Major spine surgery |
| ORW933Z | ICD-10 Procedure | Revision of Infusion Device in Thoracic Vertebral Disc, Percutaneous Approach                            | Major spine surgery |
| ORW937Z | ICD-10 Procedure | Revision of Autologous Tissue Substitute in Thoracic Vertebral Disc, Percutaneous Approach               | Major spine surgery |
| ORW93JZ | ICD-10 Procedure | Revision of Synthetic Substitute in Thoracic Vertebral Disc, Percutaneous Approach                       | Major spine surgery |
| ORW93KZ | ICD-10 Procedure | Revision of Nonautologous Tissue Substitute in Thoracic Vertebral Disc, Percutaneous Approach            | Major spine surgery |
| ORW940Z | ICD-10 Procedure | Revision of Drainage Device in Thoracic Vertebral Disc, Percutaneous Endoscopic Approach                 | Major spine surgery |
| ORW943Z | ICD-10 Procedure | Revision of Infusion Device in Thoracic Vertebral Disc, Percutaneous Endoscopic Approach                 | Major spine surgery |
| ORW947Z | ICD-10 Procedure | Revision of Autologous Tissue Substitute in Thoracic Vertebral Disc, Percutaneous Endoscopic Approach    | Major spine surgery |
| ORW94JZ | ICD-10 Procedure | Revision of Synthetic Substitute in Thoracic Vertebral Disc, Percutaneous Endoscopic Approach            | Major spine surgery |
| ORW94KZ | ICD-10 Procedure | Revision of Nonautologous Tissue Substitute in Thoracic Vertebral Disc, Percutaneous Endoscopic Approach | Major spine surgery |
| ORW9X0Z | ICD-10 Procedure | Revision of Drainage Device in Thoracic Vertebral Disc, External Approach                                | Major spine surgery |



|         |                  |                                                                                              |                     |
|---------|------------------|----------------------------------------------------------------------------------------------|---------------------|
| ORW9X3Z | ICD-10 Procedure | Revision of Infusion Device in Thoracic Vertebral Disc, External Approach                    | Major spine surgery |
| ORW9X7Z | ICD-10 Procedure | Revision of Autologous Tissue Substitute in Thoracic Vertebral Disc, External Approach       | Major spine surgery |
| ORW9XJZ | ICD-10 Procedure | Revision of Synthetic Substitute in Thoracic Vertebral Disc, External Approach               | Major spine surgery |
| ORW9XKZ | ICD-10 Procedure | Revision of Nonautologous Tissue Substitute in Thoracic Vertebral Disc, External Approach    | Major spine surgery |
| ORWA00Z | ICD-10 Procedure | Revision of Drainage Device in Thoracolumbar Vertebral Joint, Open Approach                  | Major spine surgery |
| ORWA03Z | ICD-10 Procedure | Revision of Infusion Device in Thoracolumbar Vertebral Joint, Open Approach                  | Major spine surgery |
| ORWA04Z | ICD-10 Procedure | Revision of Internal Fixation Device in Thoracolumbar Vertebral Joint, Open Approach         | Major spine surgery |
| ORWA07Z | ICD-10 Procedure | Revision of Autologous Tissue Substitute in Thoracolumbar Vertebral Joint, Open Approach     | Major spine surgery |
| ORWA08Z | ICD-10 Procedure | Revision of Spacer in Thoracolumbar Vertebral Joint, Open Approach                           | Major spine surgery |
| ORWA0AZ | ICD-10 Procedure | Revision of Interbody Fusion Device in Thoracolumbar Vertebral Joint, Open Approach          | Major spine surgery |
| ORWA0JZ | ICD-10 Procedure | Revision of Synthetic Substitute in Thoracolumbar Vertebral Joint, Open Approach             | Major spine surgery |
| ORWA0KZ | ICD-10 Procedure | Revision of Nonautologous Tissue Substitute in Thoracolumbar Vertebral Joint, Open Approach  | Major spine surgery |
| ORWA30Z | ICD-10 Procedure | Revision of Drainage Device in Thoracolumbar Vertebral Joint, Percutaneous Approach          | Major spine surgery |
| ORWA33Z | ICD-10 Procedure | Revision of Infusion Device in Thoracolumbar Vertebral Joint, Percutaneous Approach          | Major spine surgery |
| ORWA34Z | ICD-10 Procedure | Revision of Internal Fixation Device in Thoracolumbar Vertebral Joint, Percutaneous Approach | Major spine surgery |

|         |                  |                                                                                                      |                     |
|---------|------------------|------------------------------------------------------------------------------------------------------|---------------------|
| ORWA37Z | ICD-10 Procedure | Revision of Autologous Tissue Substitute in Thoracolumbar Vertebral Joint, Percutaneous Approach     | Major spine surgery |
| ORWA38Z | ICD-10 Procedure | Revision of Spacer in Thoracolumbar Vertebral Joint, Percutaneous Approach                           | Major spine surgery |
| ORWA3AZ | ICD-10 Procedure | Revision of Interbody Fusion Device in Thoracolumbar Vertebral Joint, Percutaneous Approach          | Major spine surgery |
| ORWA3JZ | ICD-10 Procedure | Revision of Synthetic Substitute in Thoracolumbar Vertebral Joint, Percutaneous Approach             | Major spine surgery |
| ORWA3KZ | ICD-10 Procedure | Revision of Nonautologous Tissue Substitute in Thoracolumbar Vertebral Joint, Percutaneous Approach  | Major spine surgery |
| ORWA40Z | ICD-10 Procedure | Revision of Drainage Device in Thoracolumbar Vertebral Joint, Percutaneous Endoscopic Approach       | Major spine surgery |
| ORWA43Z | ICD-10 Procedure | Revision of Infusion Device in Thoracolumbar Vertebral Joint, Percutaneous Endoscopic Approach       | Major spine surgery |
| ORWA44Z | ICD-10 Procedure | Revision of Internal Fixation Device in Thoracolumbar Vertebral Joint, Percutaneous Endoscopic Appro | Major spine surgery |
| ORWA47Z | ICD-10 Procedure | Revision of Autologous Tissue Substitute in Thoracolumbar Vertebral Joint, Percutaneous Endoscopic A | Major spine surgery |
| ORWA48Z | ICD-10 Procedure | Revision of Spacer in Thoracolumbar Vertebral Joint, Percutaneous Endoscopic Approach                | Major spine surgery |
| ORWA4AZ | ICD-10 Procedure | Revision of Interbody Fusion Device in Thoracolumbar Vertebral Joint, Percutaneous Endoscopic Approa | Major spine surgery |
| ORWA4JZ | ICD-10 Procedure | Revision of Synthetic Substitute in Thoracolumbar Vertebral Joint, Percutaneous Endoscopic Approach  | Major spine surgery |
| ORWA4KZ | ICD-10 Procedure | Revision of Nonautologous Tissue Substitute in Thoracolumbar Vertebral Joint, Percutaneous Endoscopi | Major spine surgery |
| ORWAX0Z | ICD-10 Procedure | Revision of Drainage Device in Thoracolumbar Vertebral Joint, External Approach                      | Major spine surgery |

|         |                  |                                                                                                 |                     |
|---------|------------------|-------------------------------------------------------------------------------------------------|---------------------|
| ORWAX3Z | ICD-10 Procedure | Revision of Infusion Device in Thoracolumbar Vertebral Joint, External Approach                 | Major spine surgery |
| ORWAX4Z | ICD-10 Procedure | Revision of Internal Fixation Device in Thoracolumbar Vertebral Joint, External Approach        | Major spine surgery |
| ORWAX7Z | ICD-10 Procedure | Revision of Autologous Tissue Substitute in Thoracolumbar Vertebral Joint, External Approach    | Major spine surgery |
| ORWAX8Z | ICD-10 Procedure | Revision of Spacer in Thoracolumbar Vertebral Joint, External Approach                          | Major spine surgery |
| ORWAXAZ | ICD-10 Procedure | Revision of Interbody Fusion Device in Thoracolumbar Vertebral Joint, External Approach         | Major spine surgery |
| ORWAXJZ | ICD-10 Procedure | Revision of Synthetic Substitute in Thoracolumbar Vertebral Joint, External Approach            | Major spine surgery |
| ORWAXKZ | ICD-10 Procedure | Revision of Nonautologous Tissue Substitute in Thoracolumbar Vertebral Joint, External Approach | Major spine surgery |
| ORWB00Z | ICD-10 Procedure | Revision of Drainage Device in Thoracolumbar Vertebral Disc, Open Approach                      | Major spine surgery |
| ORWB03Z | ICD-10 Procedure | Revision of Infusion Device in Thoracolumbar Vertebral Disc, Open Approach                      | Major spine surgery |
| ORWB07Z | ICD-10 Procedure | Revision of Autologous Tissue Substitute in Thoracolumbar Vertebral Disc, Open Approach         | Major spine surgery |
| ORWB0JZ | ICD-10 Procedure | Revision of Synthetic Substitute in Thoracolumbar Vertebral Disc, Open Approach                 | Major spine surgery |
| ORWB0KZ | ICD-10 Procedure | Revision of Nonautologous Tissue Substitute in Thoracolumbar Vertebral Disc, Open Approach      | Major spine surgery |
| ORWB30Z | ICD-10 Procedure | Revision of Drainage Device in Thoracolumbar Vertebral Disc, Percutaneous Approach              | Major spine surgery |
| ORWB33Z | ICD-10 Procedure | Revision of Infusion Device in Thoracolumbar Vertebral Disc, Percutaneous Approach              | Major spine surgery |
| ORWB37Z | ICD-10 Procedure | Revision of Autologous Tissue Substitute in Thoracolumbar Vertebral Disc, Percutaneous Approach | Major spine surgery |

|         |                  |                                                                                                      |                     |
|---------|------------------|------------------------------------------------------------------------------------------------------|---------------------|
| ORWB3JZ | ICD-10 Procedure | Revision of Synthetic Substitute in Thoracolumbar Vertebral Disc, Percutaneous Approach              | Major spine surgery |
| ORWB3KZ | ICD-10 Procedure | Revision of Nonautologous Tissue Substitute in Thoracolumbar Vertebral Disc, Percutaneous Approach   | Major spine surgery |
| ORWB4OZ | ICD-10 Procedure | Revision of Drainage Device in Thoracolumbar Vertebral Disc, Percutaneous Endoscopic Approach        | Major spine surgery |
| ORWB43Z | ICD-10 Procedure | Revision of Infusion Device in Thoracolumbar Vertebral Disc, Percutaneous Endoscopic Approach        | Major spine surgery |
| ORWB47Z | ICD-10 Procedure | Revision of Autologous Tissue Substitute in Thoracolumbar Vertebral Disc, Percutaneous Endoscopic Ap | Major spine surgery |
| ORWB4JZ | ICD-10 Procedure | Revision of Synthetic Substitute in Thoracolumbar Vertebral Disc, Percutaneous Endoscopic Approach   | Major spine surgery |
| ORWB4KZ | ICD-10 Procedure | Revision of Nonautologous Tissue Substitute in Thoracolumbar Vertebral Disc, Percutaneous Endoscopic | Major spine surgery |
| ORWBXOZ | ICD-10 Procedure | Revision of Drainage Device in Thoracolumbar Vertebral Disc, External Approach                       | Major spine surgery |
| ORWBX3Z | ICD-10 Procedure | Revision of Infusion Device in Thoracolumbar Vertebral Disc, External Approach                       | Major spine surgery |
| ORWBX7Z | ICD-10 Procedure | Revision of Autologous Tissue Substitute in Thoracolumbar Vertebral Disc, External Approach          | Major spine surgery |
| ORWBXJZ | ICD-10 Procedure | Revision of Synthetic Substitute in Thoracolumbar Vertebral Disc, External Approach                  | Major spine surgery |
| ORWBXKZ | ICD-10 Procedure | Revision of Nonautologous Tissue Substitute in Thoracolumbar Vertebral Disc, External Approach       | Major spine surgery |

22586 CPT , "Fusion of spine bones with removal of disc at lower spinal column with posterior instrumentation and Image guidance Major spine surgery

22634 CPT "Fusion of lower spine bones with removal of disc" Major spine surgery

|         |                  |                                                                                                                           |                     |
|---------|------------------|---------------------------------------------------------------------------------------------------------------------------|---------------------|
| 22848   | CPT              | "Pelvic fixation (attachment of caudal end of instrumentation to pelvic bony structures) other than sacrum                | Major spine surgery |
| 22858   | CPT              | "Insertion of artificial upper spine disc anterior approach"                                                              | Major spine surgery |
| 22551   | CPT              | "Fusion of spine bones with removal of disc at upper spinal column"                                                       | Major spine surgery |
| 22552   | CPT              | "Fusion of spine bones with removal of disc at upper spinal column"                                                       | Major spine surgery |
| 0195T   | CPT              | "Fusion of lower spine bone with removal of disc with image guidance"                                                     | Major spine surgery |
| 0196T   | CPT              | "Fusion of lower spine bone with removal of disc with image guidance"                                                     | Major spine surgery |
| 0202T   | CPT              | "Fusion of spinal facet joints using imaging guidance"                                                                    | Major spine surgery |
| 0274T   | CPT              | "Removal of upper or middle spine bone for decompression of neural elements using imaging guidance"                       | Major spine surgery |
| 0275T   | CPT              | "Removal of lower spine bone for decompression of neural elements using imaging guidance"                                 | Major spine surgery |
| 0309T   | CPT              | "Fusion of lower spine bone with removal of disc and insertion of instrumentation with image guidance"                    | Major spine surgery |
| 0375T   | CPT              | "Insertion of artificial upper spine discs anterior approach"                                                             | Major spine surgery |
| ORG1070 | ICD-10 Procedure | Fusion of Cervical Vertebral Joint with Autologous Tissue Substitute, Anterior Approach, Anterior Column, Open Approach   | Major spine surgery |
| ORG1071 | ICD-10 Procedure | Fusion of Cervical Vertebral Joint with Autologous Tissue Substitute, Posterior Approach, Posterior Column, Open Approach | Major spine surgery |
| ORG107J | ICD-10 Procedure | Fusion of Cervical Vertebral Joint with Autologous Tissue Substitute, Posterior Approach, Anterior Column, Open Approach  | Major spine surgery |

|         |                  |                                                                                                                                 |                     |
|---------|------------------|---------------------------------------------------------------------------------------------------------------------------------|---------------------|
| ORG10A0 | ICD-10 Procedure | Fusion of Cervical Vertebral Joint with Interbody Fusion Device, Anterior Approach, Anterior Column, Open Approach              | Major spine surgery |
| ORG10AJ | ICD-10 Procedure | Fusion of Cervical Vertebral Joint with Interbody Fusion Device, Posterior Approach, Anterior Column, Open Approach             | Major spine surgery |
| ORG10J0 | ICD-10 Procedure | Fusion of Cervical Vertebral Joint with Synthetic Substitute, Anterior Approach, Anterior Column, Open Approach                 | Major spine surgery |
| ORG10J1 | ICD-10 Procedure | Fusion of Cervical Vertebral Joint with Synthetic Substitute, Posterior Approach, Posterior Column, Open Approach               | Major spine surgery |
| ORG10JJ | ICD-10 Procedure | Fusion of Cervical Vertebral Joint with Synthetic Substitute, Posterior Approach, Anterior Column, Open Approach                | Major spine surgery |
| ORG10K0 | ICD-10 Procedure | Fusion of Cervical Vertebral Joint with Nonautologous Tissue Substitute, Anterior Approach, Anterior Column, Open Approach      | Major spine surgery |
| ORG10K1 | ICD-10 Procedure | Fusion of Cervical Vertebral Joint with Nonautologous Tissue Substitute, Posterior Approach, Posterior Column, Open Approach    | Major spine surgery |
| ORG10KJ | ICD-10 Procedure | Fusion of Cervical Vertebral Joint with Nonautologous Tissue Substitute, Posterior Approach, Anterior Column, Open Approach     | Major spine surgery |
| ORG10Z0 | ICD-10 Procedure | Fusion of Cervical Vertebral Joint, Anterior Approach, Anterior Column, Open Approach                                           | Major spine surgery |
| ORG10Z1 | ICD-10 Procedure | Fusion of Cervical Vertebral Joint, Posterior Approach, Posterior Column, Open Approach                                         | Major spine surgery |
| ORG10ZJ | ICD-10 Procedure | Fusion of Cervical Vertebral Joint, Posterior Approach, Anterior Column, Open Approach                                          | Major spine surgery |
| ORG1370 | ICD-10 Procedure | Fusion of Cervical Vertebral Joint with Autologous Tissue Substitute, Anterior Approach, Anterior Column, Percutaneous Approach | Major spine surgery |

|         |                  |                                                                                                                                      |                     |
|---------|------------------|--------------------------------------------------------------------------------------------------------------------------------------|---------------------|
| ORG1371 | ICD-10 Procedure | Fusion of Cervical Vertebral Joint with Autologous Tissue Substitute, Posterior Approach, Posterior Column, Percutaneous Approach    | Major spine surgery |
| ORG137J | ICD-10 Procedure | Fusion of Cervical Vertebral Joint with Autologous Tissue Substitute, Posterior Approach, Anterior Column, Percutaneous Approach     | Major spine surgery |
| ORG13A0 | ICD-10 Procedure | Fusion of Cervical Vertebral Joint with Interbody Fusion Device, Anterior Approach, Anterior Column, Percutaneous Approach           | Major spine surgery |
| ORG13A1 | ICD-10 Procedure | Fusion of Cervical Vertebral Joint with Interbody Fusion Device, Posterior Approach, Posterior Column, Percutaneous Approach         | Major spine surgery |
| ORG13AJ | ICD-10 Procedure | Fusion of Cervical Vertebral Joint with Interbody Fusion Device, Posterior Approach, Anterior Column, Percutaneous Approach          | Major spine surgery |
| ORG13J0 | ICD-10 Procedure | Fusion of Cervical Vertebral Joint with Synthetic Substitute, Anterior Approach, Anterior Column, Percutaneous Approach              | Major spine surgery |
| ORG13J1 | ICD-10 Procedure | Fusion of Cervical Vertebral Joint with Synthetic Substitute, Posterior Approach, Posterior Column, Percutaneous Approach            | Major spine surgery |
| ORG13JJ | ICD-10 Procedure | Fusion of Cervical Vertebral Joint with Synthetic Substitute, Posterior Approach, Anterior Column, Percutaneous Approach             | Major spine surgery |
| ORG13K0 | ICD-10 Procedure | Fusion of Cervical Vertebral Joint with Nonautologous Tissue Substitute, Anterior Approach, Anterior Column, Percutaneous Approach   | Major spine surgery |
| ORG13K1 | ICD-10 Procedure | Fusion of Cervical Vertebral Joint with Nonautologous Tissue Substitute, Posterior Approach, Posterior Column, Percutaneous Approach | Major spine surgery |
| ORG13KJ | ICD-10 Procedure | Fusion of Cervical Vertebral Joint with Nonautologous Tissue Substitute, Posterior Approach, Anterior Column, Percutaneous Approach  | Major spine surgery |

|         |                  |                                                                                                                                              |                     |
|---------|------------------|----------------------------------------------------------------------------------------------------------------------------------------------|---------------------|
| ORG13Z0 | ICD-10 Procedure | Fusion of Cervical Vertebral Joint, Anterior Approach, Anterior Column, Percutaneous Approach                                                | Major spine surgery |
| ORG13Z1 | ICD-10 Procedure | Fusion of Cervical Vertebral Joint, Posterior Approach, Posterior Column, Percutaneous Approach                                              | Major spine surgery |
| ORG13ZJ | ICD-10 Procedure | Fusion of Cervical Vertebral Joint, Posterior Approach, Anterior Column, Percutaneous Approach                                               | Major spine surgery |
| ORG1470 | ICD-10 Procedure | Fusion of Cervical Vertebral Joint with Autologous Tissue Substitute, Anterior Approach, Anterior Column, Percutaneous Endoscopic Approach   | Major spine surgery |
| ORG1471 | ICD-10 Procedure | Fusion of Cervical Vertebral Joint with Autologous Tissue Substitute, Posterior Approach, Posterior Column, Percutaneous Endoscopic Approach | Major spine surgery |
| ORG147J | ICD-10 Procedure | Fusion of Cervical Vertebral Joint with Autologous Tissue Substitute, Posterior Approach, Anterior Column, Percutaneous Endoscopic Approach  | Major spine surgery |
| ORG14A0 | ICD-10 Procedure | Fusion of Cervical Vertebral Joint with Interbody Fusion Device, Anterior Approach, Anterior Column, Percutaneous Endoscopic Approach        | Major spine surgery |
| ORG14A1 | ICD-10 Procedure | Fusion of Cervical Vertebral Joint with Interbody Fusion Device, Posterior Approach, Posterior Column, Percutaneous Endoscopic Approach      | Major spine surgery |
| ORG14AJ | ICD-10 Procedure | Fusion of Cervical Vertebral Joint with Interbody Fusion Device, Posterior Approach, Anterior Column, Percutaneous Endoscopic Approach       | Major spine surgery |
| ORG14J0 | ICD-10 Procedure | Fusion of Cervical Vertebral Joint with Synthetic Substitute, Anterior Approach, Anterior Column, Percutaneous Endoscopic Approach           | Major spine surgery |
| ORG14J1 | ICD-10 Procedure | Fusion of Cervical Vertebral Joint with Synthetic Substitute, Posterior Approach, Posterior Column, Percutaneous Endoscopic Approach         | Major spine surgery |



|         |                  |                                                                                                                                                 |                     |
|---------|------------------|-------------------------------------------------------------------------------------------------------------------------------------------------|---------------------|
| ORG14JJ | ICD-10 Procedure | Fusion of Cervical Vertebral Joint with Synthetic Substitute, Posterior Approach, Anterior Column, Percutaneous Endoscopic Approach             | Major spine surgery |
| ORG14K0 | ICD-10 Procedure | Fusion of Cervical Vertebral Joint with Nonautologous Tissue Substitute, Anterior Approach, Anterior Column, Percutaneous Endoscopic Approach   | Major spine surgery |
| ORG14K1 | ICD-10 Procedure | Fusion of Cervical Vertebral Joint with Nonautologous Tissue Substitute, Posterior Approach, Posterior Column, Percutaneous Endoscopic Approach | Major spine surgery |
| ORG14KJ | ICD-10 Procedure | Fusion of Cervical Vertebral Joint with Nonautologous Tissue Substitute, Posterior Approach, Anterior Column, Percutaneous Endoscopic Approach  | Major spine surgery |
| ORG14Z0 | ICD-10 Procedure | Fusion of Cervical Vertebral Joint, Anterior Approach, Anterior Column, Percutaneous Endoscopic Approach                                        | Major spine surgery |
| ORG14Z1 | ICD-10 Procedure | Fusion of Cervical Vertebral Joint, Posterior Approach, Posterior Column, Percutaneous Endoscopic Approach                                      | Major spine surgery |
| ORG14ZJ | ICD-10 Procedure | Fusion of Cervical Vertebral Joint, Posterior Approach, Anterior Column, Percutaneous Endoscopic Approach                                       | Major spine surgery |
| ORG2070 | ICD-10 Procedure | Fusion of 2 or more Cervical Vertebral Joints with Autologous Tissue Substitute, Anterior Approach, Anterior Column, Open Approach              | Major spine surgery |
| ORG20A0 | ICD-10 Procedure | Fusion of 2 or more Cervical Vertebral Joints with Interbody Fusion Device, Anterior Approach, Anterior Column, Open Approach                   | Major spine surgery |
| ORG20A1 | ICD-10 Procedure | Fusion of 2 or more Cervical Vertebral Joints with Interbody Fusion Device, Posterior Approach, Posterior Column, Open Approach                 | Major spine surgery |

|         |                  |                                                                                                                                            |                     |
|---------|------------------|--------------------------------------------------------------------------------------------------------------------------------------------|---------------------|
| ORG20AJ | ICD-10 Procedure | Fusion of 2 or more Cervical Vertebral Joints with Interbody Fusion Device, Posterior Approach, Anterior Column, Open Approach             | Major spine surgery |
| ORG20JO | ICD-10 Procedure | Fusion of 2 or more Cervical Vertebral Joints with Synthetic Substitute, Anterior Approach, Anterior Column, Open Approach                 | Major spine surgery |
| ORG20J1 | ICD-10 Procedure | Fusion of 2 or more Cervical Vertebral Joints with Synthetic Substitute, Posterior Approach, Posterior Column, Open Approach               | Major spine surgery |
| ORG20JJ | ICD-10 Procedure | Fusion of 2 or more Cervical Vertebral Joints with Synthetic Substitute, Posterior Approach, Anterior Column, Open Approach                | Major spine surgery |
| ORG20K0 | ICD-10 Procedure | Fusion of 2 or more Cervical Vertebral Joints with Nonautologous Tissue Substitute, Anterior Approach, Anterior Column, Open Approach      | Major spine surgery |
| ORG20K1 | ICD-10 Procedure | Fusion of 2 or more Cervical Vertebral Joints with Nonautologous Tissue Substitute, Posterior Approach, Posterior Column, Open Approach    | Major spine surgery |
| ORG20KJ | ICD-10 Procedure | Fusion of 2 or more Cervical Vertebral Joints with Nonautologous Tissue Substitute, Posterior Approach, Anterior Column, Open Approach     | Major spine surgery |
| ORG20Z0 | ICD-10 Procedure | Fusion of 2 or more Cervical Vertebral Joints, Anterior Approach, Anterior Column, Open Approach                                           | Major spine surgery |
| ORG20Z1 | ICD-10 Procedure | Fusion of 2 or more Cervical Vertebral Joints, Posterior Approach, Posterior Column, Open Approach                                         | Major spine surgery |
| ORG20ZJ | ICD-10 Procedure | Fusion of 2 or more Cervical Vertebral Joints, Posterior Approach, Anterior Column, Open Approach                                          | Major spine surgery |
| ORG2370 | ICD-10 Procedure | Fusion of 2 or more Cervical Vertebral Joints with Autologous Tissue Substitute, Anterior Approach, Anterior Column, Percutaneous Approach | Major spine surgery |

|         |                  |                                                                                                                                               |                     |
|---------|------------------|-----------------------------------------------------------------------------------------------------------------------------------------------|---------------------|
| ORG2371 | ICD-10 Procedure | Fusion of 2 or more Cervical Vertebral Joints with Autologous Tissue Substitute, Posterior Approach, Posterior Column, Percutaneous Approach  | Major spine surgery |
| ORG237J | ICD-10 Procedure | Fusion of 2 or more Cervical Vertebral Joints with Autologous Tissue Substitute, Posterior Approach, Anterior Column, Percutaneous Approach   | Major spine surgery |
| ORG23A0 | ICD-10 Procedure | Fusion of 2 or more Cervical Vertebral Joints with Interbody Fusion Device, Anterior Approach, Anterior Column, Percutaneous Approach         | Major spine surgery |
| ORG23A1 | ICD-10 Procedure | Fusion of 2 or more Cervical Vertebral Joints with Interbody Fusion Device, Posterior Approach, Posterior Column, Percutaneous Approach       | Major spine surgery |
| ORG23AJ | ICD-10 Procedure | Fusion of 2 or more Cervical Vertebral Joints with Interbody Fusion Device, Posterior Approach, Anterior Column, Percutaneous Approach        | Major spine surgery |
| ORG23J0 | ICD-10 Procedure | Fusion of 2 or more Cervical Vertebral Joints with Synthetic Substitute, Anterior Approach, Anterior Column, Percutaneous Approach            | Major spine surgery |
| ORG23J1 | ICD-10 Procedure | Fusion of 2 or more Cervical Vertebral Joints with Synthetic Substitute, Posterior Approach, Posterior Column, Percutaneous Approach          | Major spine surgery |
| ORG23JJ | ICD-10 Procedure | Fusion of 2 or more Cervical Vertebral Joints with Synthetic Substitute, Posterior Approach, Anterior Column, Percutaneous Approach           | Major spine surgery |
| ORG23K0 | ICD-10 Procedure | Fusion of 2 or more Cervical Vertebral Joints with Nonautologous Tissue Substitute, Anterior Approach, Anterior Column, Percutaneous Approach | Major spine surgery |

|         |                  |                                                                                                                                                         |                     |
|---------|------------------|---------------------------------------------------------------------------------------------------------------------------------------------------------|---------------------|
| ORG23K1 | ICD-10 Procedure | Fusion of 2 or more Cervical Vertebral Joints with Nonautologous Tissue Substitute, Posterior Approach, Posterior Column, Percutaneous Approach         | Major spine surgery |
| ORG23KJ | ICD-10 Procedure | Fusion of 2 or more Cervical Vertebral Joints with Nonautologous Tissue Substitute, Posterior Approach, Anterior Column, Percutaneous Approach          | Major spine surgery |
| ORG23Z1 | ICD-10 Procedure | Fusion of 2 or more Cervical Vertebral Joints, Posterior Approach, Posterior Column, Percutaneous Approach                                              | Major spine surgery |
| ORG23ZJ | ICD-10 Procedure | Fusion of 2 or more Cervical Vertebral Joints, Posterior Approach, Anterior Column, Percutaneous Approach                                               | Major spine surgery |
| ORG2470 | ICD-10 Procedure | Fusion of 2 or more Cervical Vertebral Joints with Autologous Tissue Substitute, Anterior Approach, Anterior Column, Percutaneous Endoscopic Approach   | Major spine surgery |
| ORG2471 | ICD-10 Procedure | Fusion of 2 or more Cervical Vertebral Joints with Autologous Tissue Substitute, Posterior Approach, Posterior Column, Percutaneous Endoscopic Approach | Major spine surgery |
| ORG247J | ICD-10 Procedure | Fusion of 2 or more Cervical Vertebral Joints with Autologous Tissue Substitute, Posterior Approach, Anterior Column, Percutaneous Endoscopic Approach  | Major spine surgery |
| ORG24A0 | ICD-10 Procedure | Fusion of 2 or more Cervical Vertebral Joints with Interbody Fusion Device, Anterior Approach, Anterior Column, Percutaneous Endoscopic Approach        | Major spine surgery |
| ORG24A1 | ICD-10 Procedure | Fusion of 2 or more Cervical Vertebral Joints with Interbody Fusion Device, Posterior Approach, Posterior Column, Percutaneous Endoscopic Approach      | Major spine surgery |

|         |                  |                                                                                                                                                            |                     |
|---------|------------------|------------------------------------------------------------------------------------------------------------------------------------------------------------|---------------------|
| ORG24AJ | ICD-10 Procedure | Fusion of 2 or more Cervical Vertebral Joints with Interbody Fusion Device, Posterior Approach, Anterior Column, Percutaneous Endoscopic Approach          | Major spine surgery |
| ORG24J0 | ICD-10 Procedure | Fusion of 2 or more Cervical Vertebral Joints with Synthetic Substitute, Anterior Approach, Anterior Column, Percutaneous Endoscopic Approach              | Major spine surgery |
| ORG24J1 | ICD-10 Procedure | Fusion of 2 or more Cervical Vertebral Joints with Synthetic Substitute, Posterior Approach, Posterior Column, Percutaneous Endoscopic Approach            | Major spine surgery |
| ORG24JJ | ICD-10 Procedure | Fusion of 2 or more Cervical Vertebral Joints with Synthetic Substitute, Posterior Approach, Anterior Column, Percutaneous Endoscopic Approach             | Major spine surgery |
| ORG24K0 | ICD-10 Procedure | Fusion of 2 or more Cervical Vertebral Joints with Nonautologous Tissue Substitute, Anterior Approach, Anterior Column, Percutaneous Endoscopic Approach   | Major spine surgery |
| ORG24K1 | ICD-10 Procedure | Fusion of 2 or more Cervical Vertebral Joints with Nonautologous Tissue Substitute, Posterior Approach, Posterior Column, Percutaneous Endoscopic Approach | Major spine surgery |
| ORG24KJ | ICD-10 Procedure | Fusion of 2 or more Cervical Vertebral Joints with Nonautologous Tissue Substitute, Posterior Approach, Anterior Column, Percutaneous Endoscopic Approach  | Major spine surgery |
| ORG24Z0 | ICD-10 Procedure | Fusion of 2 or more Cervical Vertebral Joints, Anterior Approach, Anterior Column, Percutaneous Endoscopic Approach                                        | Major spine surgery |
| ORG24Z1 | ICD-10 Procedure | Fusion of 2 or more Cervical Vertebral Joints, Posterior Approach, Posterior Column, Percutaneous Endoscopic Approach                                      | Major spine surgery |

|         |                  |                                                                                                                                   |                     |
|---------|------------------|-----------------------------------------------------------------------------------------------------------------------------------|---------------------|
| ORG24ZJ | ICD-10 Procedure | Fusion of 2 or more Cervical Vertebral Joints, Posterior Approach, Anterior Column, Percutaneous Endoscopic Approach              | Major spine surgery |
| ORG4070 | ICD-10 Procedure | Fusion of Cervicothoracic Vertebral Joint with Autologous Tissue Substitute, Anterior Approach, Anterior Column, Open Approach    | Major spine surgery |
| ORG4071 | ICD-10 Procedure | Fusion of Cervicothoracic Vertebral Joint with Autologous Tissue Substitute, Posterior Approach, Posterior Column, Open Approach  | Major spine surgery |
| ORG407J | ICD-10 Procedure | Fusion of Cervicothoracic Vertebral Joint with Autologous Tissue Substitute, Posterior Approach, Anterior Column, Open Approach   | Major spine surgery |
| ORG40A0 | ICD-10 Procedure | Fusion of Cervicothoracic Vertebral Joint with Interbody Fusion Device, Anterior Approach, Anterior Column, Open Approach         | Major spine surgery |
| ORG40A1 | ICD-10 Procedure | Fusion of Cervicothoracic Vertebral Joint with Interbody Fusion Device, Posterior Approach, Posterior Column, Open Approach       | Major spine surgery |
| ORG40AJ | ICD-10 Procedure | Fusion of Cervicothoracic Vertebral Joint with Interbody Fusion Device, Posterior Approach, Anterior Column, Open Approach        | Major spine surgery |
| ORG40J0 | ICD-10 Procedure | Fusion of Cervicothoracic Vertebral Joint with Synthetic Substitute, Anterior Approach, Anterior Column, Open Approach            | Major spine surgery |
| ORG40J1 | ICD-10 Procedure | Fusion of Cervicothoracic Vertebral Joint with Synthetic Substitute, Posterior Approach, Posterior Column, Open Approach          | Major spine surgery |
| ORG40JJ | ICD-10 Procedure | Fusion of Cervicothoracic Vertebral Joint with Synthetic Substitute, Posterior Approach, Anterior Column, Open Approach           | Major spine surgery |
| ORG40K0 | ICD-10 Procedure | Fusion of Cervicothoracic Vertebral Joint with Nonautologous Tissue Substitute, Anterior Approach, Anterior Column, Open Approach | Major spine surgery |

|         |                  |                                                                                                                                          |                     |
|---------|------------------|------------------------------------------------------------------------------------------------------------------------------------------|---------------------|
| ORG40K1 | ICD-10 Procedure | Fusion of Cervicothoracic Vertebral Joint with Nonautologous Tissue Substitute, Posterior Approach, Posterior Column, Open Approach      | Major spine surgery |
| ORG40KJ | ICD-10 Procedure | Fusion of Cervicothoracic Vertebral Joint with Nonautologous Tissue Substitute, Posterior Approach, Anterior Column, Open Approach       | Major spine surgery |
| ORG40ZO | ICD-10 Procedure | Fusion of Cervicothoracic Vertebral Joint, Anterior Approach, Anterior Column, Open Approach                                             | Major spine surgery |
| ORG40Z1 | ICD-10 Procedure | Fusion of Cervicothoracic Vertebral Joint, Posterior Approach, Posterior Column, Open Approach                                           | Major spine surgery |
| ORG40ZJ | ICD-10 Procedure | Fusion of Cervicothoracic Vertebral Joint, Posterior Approach, Anterior Column, Open Approach                                            | Major spine surgery |
| ORG4370 | ICD-10 Procedure | Fusion of Cervicothoracic Vertebral Joint with Autologous Tissue Substitute, Anterior Approach, Anterior Column, Percutaneous Approach   | Major spine surgery |
| ORG4371 | ICD-10 Procedure | Fusion of Cervicothoracic Vertebral Joint with Autologous Tissue Substitute, Posterior Approach, Posterior Column, Percutaneous Approach | Major spine surgery |
| ORG437J | ICD-10 Procedure | Fusion of Cervicothoracic Vertebral Joint with Autologous Tissue Substitute, Posterior Approach, Anterior Column, Percutaneous Approach  | Major spine surgery |
| ORG43A0 | ICD-10 Procedure | Fusion of Cervicothoracic Vertebral Joint with Interbody Fusion Device, Anterior Approach, Anterior Column, Percutaneous Approach        | Major spine surgery |
| ORG43A1 | ICD-10 Procedure | Fusion of Cervicothoracic Vertebral Joint with Interbody Fusion Device, Posterior Approach, Posterior Column, Percutaneous Approach      | Major spine surgery |
| ORG43AJ | ICD-10 Procedure | Fusion of Cervicothoracic Vertebral Joint with Interbody Fusion Device, Posterior Approach, Anterior Column, Percutaneous Approach       | Major spine surgery |

|         |                  |                                                                                                                                                     |                     |
|---------|------------------|-----------------------------------------------------------------------------------------------------------------------------------------------------|---------------------|
| ORG43J0 | ICD-10 Procedure | Fusion of Cervicothoracic Vertebral Joint with Synthetic Substitute, Anterior Approach, Anterior Column, Percutaneous Approach                      | Major spine surgery |
| ORG43J1 | ICD-10 Procedure | Fusion of Cervicothoracic Vertebral Joint with Synthetic Substitute, Posterior Approach, Posterior Column, Percutaneous Approach                    | Major spine surgery |
| ORG43JJ | ICD-10 Procedure | Fusion of Cervicothoracic Vertebral Joint with Synthetic Substitute, Posterior Approach, Anterior Column, Percutaneous Approach                     | Major spine surgery |
| ORG43K0 | ICD-10 Procedure | Fusion of Cervicothoracic Vertebral Joint with Nonautologous Tissue Substitute, Anterior Approach, Anterior Column, Percutaneous Approach           | Major spine surgery |
| ORG43K1 | ICD-10 Procedure | Fusion of Cervicothoracic Vertebral Joint with Nonautologous Tissue Substitute, Posterior Approach, Posterior Column, Percutaneous Approach         | Major spine surgery |
| ORG43KJ | ICD-10 Procedure | Fusion of Cervicothoracic Vertebral Joint with Nonautologous Tissue Substitute, Posterior Approach, Anterior Column, Percutaneous Approach          | Major spine surgery |
| ORG43Z0 | ICD-10 Procedure | Fusion of Cervicothoracic Vertebral Joint, Anterior Approach, Anterior Column, Percutaneous Approach                                                | Major spine surgery |
| ORG43Z1 | ICD-10 Procedure | Fusion of Cervicothoracic Vertebral Joint, Posterior Approach, Posterior Column, Percutaneous Approach                                              | Major spine surgery |
| ORG43ZJ | ICD-10 Procedure | Fusion of Cervicothoracic Vertebral Joint, Posterior Approach, Anterior Column, Percutaneous Approach                                               | Major spine surgery |
| ORG4470 | ICD-10 Procedure | Fusion of Cervicothoracic Vertebral Joint with Autologous Tissue Substitute, Anterior Approach, Anterior Column, Percutaneous Endoscopic Approach   | Major spine surgery |
| ORG4471 | ICD-10 Procedure | Fusion of Cervicothoracic Vertebral Joint with Autologous Tissue Substitute, Posterior Approach, Posterior Column, Percutaneous Endoscopic Approach | Major spine surgery |



|         |                  |                                                                                                                                                        |                     |
|---------|------------------|--------------------------------------------------------------------------------------------------------------------------------------------------------|---------------------|
| ORG447J | ICD-10 Procedure | Fusion of Cervicothoracic Vertebral Joint with Autologous Tissue Substitute, Posterior Approach, Anterior Column, Percutaneous Endoscopic Approach     | Major spine surgery |
| ORG44A0 | ICD-10 Procedure | Fusion of Cervicothoracic Vertebral Joint with Interbody Fusion Device, Anterior Approach, Anterior Column, Percutaneous Endoscopic Approach           | Major spine surgery |
| ORG44A1 | ICD-10 Procedure | Fusion of Cervicothoracic Vertebral Joint with Interbody Fusion Device, Posterior Approach, Posterior Column, Percutaneous Endoscopic Approach         | Major spine surgery |
| ORG44AJ | ICD-10 Procedure | Fusion of Cervicothoracic Vertebral Joint with Interbody Fusion Device, Posterior Approach, Anterior Column, Percutaneous Endoscopic Approach          | Major spine surgery |
| ORG44J0 | ICD-10 Procedure | Fusion of Cervicothoracic Vertebral Joint with Synthetic Substitute, Anterior Approach, Anterior Column, Percutaneous Endoscopic Approach              | Major spine surgery |
| ORG44J1 | ICD-10 Procedure | Fusion of Cervicothoracic Vertebral Joint with Synthetic Substitute, Posterior Approach, Posterior Column, Percutaneous Endoscopic Approach            | Major spine surgery |
| ORG44JJ | ICD-10 Procedure | Fusion of Cervicothoracic Vertebral Joint with Synthetic Substitute, Posterior Approach, Anterior Column, Percutaneous Endoscopic Approach             | Major spine surgery |
| ORG44K0 | ICD-10 Procedure | Fusion of Cervicothoracic Vertebral Joint with Nonautologous Tissue Substitute, Anterior Approach, Anterior Column, Percutaneous Endoscopic Approach   | Major spine surgery |
| ORG44K1 | ICD-10 Procedure | Fusion of Cervicothoracic Vertebral Joint with Nonautologous Tissue Substitute, Posterior Approach, Posterior Column, Percutaneous Endoscopic Approach | Major spine surgery |

|         |                  |                                                                                                                                                       |                     |
|---------|------------------|-------------------------------------------------------------------------------------------------------------------------------------------------------|---------------------|
| ORG44KJ | ICD-10 Procedure | Fusion of Cervicothoracic Vertebral Joint with Nonautologous Tissue Substitute, Posterior Approach, Anterior Column, Percutaneous Endoscopic Approach | Major spine surgery |
| ORG44ZO | ICD-10 Procedure | Fusion of Cervicothoracic Vertebral Joint, Anterior Approach, Anterior Column, Percutaneous Endoscopic Approach                                       | Major spine surgery |
| ORG44Z1 | ICD-10 Procedure | Fusion of Cervicothoracic Vertebral Joint, Posterior Approach, Posterior Column, Percutaneous Endoscopic Approach                                     | Major spine surgery |
| ORG44ZJ | ICD-10 Procedure | Fusion of Cervicothoracic Vertebral Joint, Posterior Approach, Anterior Column, Percutaneous Endoscopic Approach                                      | Major spine surgery |
| ORG6070 | ICD-10 Procedure | Fusion of Thoracic Vertebral Joint with Autologous Tissue Substitute, Anterior Approach, Anterior Column, Open Approach                               | Major spine surgery |
| ORG6071 | ICD-10 Procedure | Fusion of Thoracic Vertebral Joint with Autologous Tissue Substitute, Posterior Approach, Posterior Column, Open Approach                             | Major spine surgery |
| ORG607J | ICD-10 Procedure | Fusion of Thoracic Vertebral Joint with Autologous Tissue Substitute, Posterior Approach, Anterior Column, Open Approach                              | Major spine surgery |
| ORG60A0 | ICD-10 Procedure | Fusion of Thoracic Vertebral Joint with Interbody Fusion Device, Anterior Approach, Anterior Column, Open Approach                                    | Major spine surgery |
| ORG60A1 | ICD-10 Procedure | Fusion of Thoracic Vertebral Joint with Interbody Fusion Device, Posterior Approach, Posterior Column, Open Approach                                  | Major spine surgery |
| ORG60AJ | ICD-10 Procedure | Fusion of Thoracic Vertebral Joint with Interbody Fusion Device, Posterior Approach, Anterior Column, Open Approach                                   | Major spine surgery |
| ORG60J0 | ICD-10 Procedure | Fusion of Thoracic Vertebral Joint with Synthetic Substitute, Anterior Approach, Anterior Column, Open Approach                                       | Major spine surgery |

|         |                  |                                                                                                                                   |                     |
|---------|------------------|-----------------------------------------------------------------------------------------------------------------------------------|---------------------|
| ORG60J1 | ICD-10 Procedure | Fusion of Thoracic Vertebral Joint with Synthetic Substitute, Posterior Approach, Posterior Column, Open Approach                 | Major spine surgery |
| ORG60JJ | ICD-10 Procedure | Fusion of Thoracic Vertebral Joint with Synthetic Substitute, Posterior Approach, Anterior Column, Open Approach                  | Major spine surgery |
| ORG60K0 | ICD-10 Procedure | Fusion of Thoracic Vertebral Joint with Nonautologous Tissue Substitute, Anterior Approach, Anterior Column, Open Approach        | Major spine surgery |
| ORG60K1 | ICD-10 Procedure | Fusion of Thoracic Vertebral Joint with Nonautologous Tissue Substitute, Posterior Approach, Posterior Column, Open Approach      | Major spine surgery |
| ORG60KJ | ICD-10 Procedure | Fusion of Thoracic Vertebral Joint with Nonautologous Tissue Substitute, Posterior Approach, Anterior Column, Open Approach       | Major spine surgery |
| ORG60Z0 | ICD-10 Procedure | Fusion of Thoracic Vertebral Joint, Anterior Approach, Anterior Column, Open Approach                                             | Major spine surgery |
| ORG60Z1 | ICD-10 Procedure | Fusion of Thoracic Vertebral Joint, Posterior Approach, Posterior Column, Open Approach                                           | Major spine surgery |
| ORG60ZJ | ICD-10 Procedure | Fusion of Thoracic Vertebral Joint, Posterior Approach, Anterior Column, Open Approach                                            | Major spine surgery |
| ORG6370 | ICD-10 Procedure | Fusion of Thoracic Vertebral Joint with Autologous Tissue Substitute, Anterior Approach, Anterior Column, Percutaneous Approach   | Major spine surgery |
| ORG6371 | ICD-10 Procedure | Fusion of Thoracic Vertebral Joint with Autologous Tissue Substitute, Posterior Approach, Posterior Column, Percutaneous Approach | Major spine surgery |
| ORG637J | ICD-10 Procedure | Fusion of Thoracic Vertebral Joint with Autologous Tissue Substitute, Posterior Approach, Anterior Column, Percutaneous Approach  | Major spine surgery |
| ORG63A0 | ICD-10 Procedure | Fusion of Thoracic Vertebral Joint with Interbody Fusion Device, Anterior Approach, Anterior Column, Percutaneous Approach        | Major spine surgery |

|         |                  |                                                                                                                                      |                     |
|---------|------------------|--------------------------------------------------------------------------------------------------------------------------------------|---------------------|
| ORG63A1 | ICD-10 Procedure | Fusion of Thoracic Vertebral Joint with Interbody Fusion Device, Posterior Approach, Posterior Column, Percutaneous Approach         | Major spine surgery |
| ORG63AJ | ICD-10 Procedure | Fusion of Thoracic Vertebral Joint with Interbody Fusion Device, Posterior Approach, Anterior Column, Percutaneous Approach          | Major spine surgery |
| ORG63J0 | ICD-10 Procedure | Fusion of Thoracic Vertebral Joint with Synthetic Substitute, Anterior Approach, Anterior Column, Percutaneous Approach              | Major spine surgery |
| ORG63J1 | ICD-10 Procedure | Fusion of Thoracic Vertebral Joint with Synthetic Substitute, Posterior Approach, Posterior Column, Percutaneous Approach            | Major spine surgery |
| ORG63JJ | ICD-10 Procedure | Fusion of Thoracic Vertebral Joint with Synthetic Substitute, Posterior Approach, Anterior Column, Percutaneous Approach             | Major spine surgery |
| ORG63K0 | ICD-10 Procedure | Fusion of Thoracic Vertebral Joint with Nonautologous Tissue Substitute, Anterior Approach, Anterior Column, Percutaneous Approach   | Major spine surgery |
| ORG63K1 | ICD-10 Procedure | Fusion of Thoracic Vertebral Joint with Nonautologous Tissue Substitute, Posterior Approach, Posterior Column, Percutaneous Approach | Major spine surgery |
| ORG63KJ | ICD-10 Procedure | Fusion of Thoracic Vertebral Joint with Nonautologous Tissue Substitute, Posterior Approach, Anterior Column, Percutaneous Approach  | Major spine surgery |
| ORG63Z0 | ICD-10 Procedure | Fusion of Thoracic Vertebral Joint, Anterior Approach, Anterior Column, Percutaneous Approach                                        | Major spine surgery |
| ORG63Z1 | ICD-10 Procedure | Fusion of Thoracic Vertebral Joint, Posterior Approach, Posterior Column, Percutaneous Approach                                      | Major spine surgery |
| ORG63ZJ | ICD-10 Procedure | Fusion of Thoracic Vertebral Joint, Posterior Approach, Anterior Column, Percutaneous Approach                                       | Major spine surgery |

|         |                  |                                                                                                                                               |                     |
|---------|------------------|-----------------------------------------------------------------------------------------------------------------------------------------------|---------------------|
| ORG6470 | ICD-10 Procedure | Fusion of Thoracic Vertebral Joint with Autologous Tissue Substitute, Anterior Approach, Anterior Column, Percutaneous Endoscopic Approach    | Major spine surgery |
| ORG6471 | ICD-10 Procedure | Fusion of Thoracic Vertebral Joint with Autologous Tissue Substitute, Posterior Approach, Posterior Column, Percutaneous Endoscopic Approach  | Major spine surgery |
| ORG647J | ICD-10 Procedure | Fusion of Thoracic Vertebral Joint with Autologous Tissue Substitute, Posterior Approach, Anterior Column, Percutaneous Endoscopic Approach   | Major spine surgery |
| ORG64A0 | ICD-10 Procedure | Fusion of Thoracic Vertebral Joint with Interbody Fusion Device, Anterior Approach, Anterior Column, Percutaneous Endoscopic Approach         | Major spine surgery |
| ORG64A1 | ICD-10 Procedure | Fusion of Thoracic Vertebral Joint with Interbody Fusion Device, Posterior Approach, Posterior Column, Percutaneous Endoscopic Approach       | Major spine surgery |
| ORG64AJ | ICD-10 Procedure | Fusion of Thoracic Vertebral Joint with Interbody Fusion Device, Posterior Approach, Anterior Column, Percutaneous Endoscopic Approach        | Major spine surgery |
| ORG64J0 | ICD-10 Procedure | Fusion of Thoracic Vertebral Joint with Synthetic Substitute, Anterior Approach, Anterior Column, Percutaneous Endoscopic Approach            | Major spine surgery |
| ORG64J1 | ICD-10 Procedure | Fusion of Thoracic Vertebral Joint with Synthetic Substitute, Posterior Approach, Posterior Column, Percutaneous Endoscopic Approach          | Major spine surgery |
| ORG64JJ | ICD-10 Procedure | Fusion of Thoracic Vertebral Joint with Synthetic Substitute, Posterior Approach, Anterior Column, Percutaneous Endoscopic Approach           | Major spine surgery |
| ORG64K0 | ICD-10 Procedure | Fusion of Thoracic Vertebral Joint with Nonautologous Tissue Substitute, Anterior Approach, Anterior Column, Percutaneous Endoscopic Approach | Major spine surgery |

|         |                  |                                                                                                                                                 |                     |
|---------|------------------|-------------------------------------------------------------------------------------------------------------------------------------------------|---------------------|
| ORG64K1 | ICD-10 Procedure | Fusion of Thoracic Vertebral Joint with Nonautologous Tissue Substitute, Posterior Approach, Posterior Column, Percutaneous Endoscopic Approach | Major spine surgery |
| ORG64KJ | ICD-10 Procedure | Fusion of Thoracic Vertebral Joint with Nonautologous Tissue Substitute, Posterior Approach, Anterior Column, Percutaneous Endoscopic Approach  | Major spine surgery |
| ORG64ZO | ICD-10 Procedure | Fusion of Thoracic Vertebral Joint, Anterior Approach, Anterior Column, Percutaneous Endoscopic Approach                                        | Major spine surgery |
| ORG64Z1 | ICD-10 Procedure | Fusion of Thoracic Vertebral Joint, Posterior Approach, Posterior Column, Percutaneous Endoscopic Approach                                      | Major spine surgery |
| ORG64ZJ | ICD-10 Procedure | Fusion of Thoracic Vertebral Joint, Posterior Approach, Anterior Column, Percutaneous Endoscopic Approach                                       | Major spine surgery |
| ORG7070 | ICD-10 Procedure | Fusion of 2 to 7 Thoracic Vertebral Joints with Autologous Tissue Substitute, Anterior Approach, Anterior Column, Open Approach                 | Major spine surgery |
| ORG7071 | ICD-10 Procedure | Fusion of 2 to 7 Thoracic Vertebral Joints with Autologous Tissue Substitute, Posterior Approach, Posterior Column, Open Approach               | Major spine surgery |
| ORG707J | ICD-10 Procedure | Fusion of 2 to 7 Thoracic Vertebral Joints with Autologous Tissue Substitute, Posterior Approach, Anterior Column, Open Approach                | Major spine surgery |
| ORG70A0 | ICD-10 Procedure | Fusion of 2 to 7 Thoracic Vertebral Joints with Interbody Fusion Device, Anterior Approach, Anterior Column, Open Approach                      | Major spine surgery |
| ORG70A1 | ICD-10 Procedure | Fusion of 2 to 7 Thoracic Vertebral Joints with Interbody Fusion Device, Posterior Approach, Posterior Column, Open Approach                    | Major spine surgery |
| ORG70AJ | ICD-10 Procedure | Fusion of 2 to 7 Thoracic Vertebral Joints with Interbody Fusion Device, Posterior Approach, Anterior Column, Open Approach                     | Major spine surgery |

|         |                  |                                                                                                                                           |                     |
|---------|------------------|-------------------------------------------------------------------------------------------------------------------------------------------|---------------------|
| ORG70J0 | ICD-10 Procedure | Fusion of 2 to 7 Thoracic Vertebral Joints with Synthetic Substitute, Anterior Approach, Anterior Column, Open Approach                   | Major spine surgery |
| ORG70J1 | ICD-10 Procedure | Fusion of 2 to 7 Thoracic Vertebral Joints with Synthetic Substitute, Posterior Approach, Posterior Column, Open Approach                 | Major spine surgery |
| ORG70JJ | ICD-10 Procedure | Fusion of 2 to 7 Thoracic Vertebral Joints with Synthetic Substitute, Posterior Approach, Anterior Column, Open Approach                  | Major spine surgery |
| ORG70K0 | ICD-10 Procedure | Fusion of 2 to 7 Thoracic Vertebral Joints with Nonautologous Tissue Substitute, Anterior Approach, Anterior Column, Open Approach        | Major spine surgery |
| ORG70K1 | ICD-10 Procedure | Fusion of 2 to 7 Thoracic Vertebral Joints with Nonautologous Tissue Substitute, Posterior Approach, Posterior Column, Open Approach      | Major spine surgery |
| ORG70KJ | ICD-10 Procedure | Fusion of 2 to 7 Thoracic Vertebral Joints with Nonautologous Tissue Substitute, Posterior Approach, Anterior Column, Open Approach       | Major spine surgery |
| ORG70Z0 | ICD-10 Procedure | Fusion of 2 to 7 Thoracic Vertebral Joints, Anterior Approach, Anterior Column, Open Approach                                             | Major spine surgery |
| ORG70Z1 | ICD-10 Procedure | Fusion of 2 to 7 Thoracic Vertebral Joints, Posterior Approach, Posterior Column, Open Approach                                           | Major spine surgery |
| ORG70ZJ | ICD-10 Procedure | Fusion of 2 to 7 Thoracic Vertebral Joints, Posterior Approach, Anterior Column, Open Approach                                            | Major spine surgery |
| ORG7370 | ICD-10 Procedure | Fusion of 2 to 7 Thoracic Vertebral Joints with Autologous Tissue Substitute, Anterior Approach, Anterior Column, Percutaneous Approach   | Major spine surgery |
| ORG7371 | ICD-10 Procedure | Fusion of 2 to 7 Thoracic Vertebral Joints with Autologous Tissue Substitute, Posterior Approach, Posterior Column, Percutaneous Approach | Major spine surgery |

|         |                  |                                                                                                                                              |                     |
|---------|------------------|----------------------------------------------------------------------------------------------------------------------------------------------|---------------------|
| ORG737J | ICD-10 Procedure | Fusion of 2 to 7 Thoracic Vertebral Joints with Autologous Tissue Substitute, Posterior Approach, Anterior Column, Percutaneous Approach     | Major spine surgery |
| ORG73A0 | ICD-10 Procedure | Fusion of 2 to 7 Thoracic Vertebral Joints with Interbody Fusion Device, Anterior Approach, Anterior Column, Percutaneous Approach           | Major spine surgery |
| ORG73A1 | ICD-10 Procedure | Fusion of 2 to 7 Thoracic Vertebral Joints with Interbody Fusion Device, Posterior Approach, Posterior Column, Percutaneous Approach         | Major spine surgery |
| ORG73AJ | ICD-10 Procedure | Fusion of 2 to 7 Thoracic Vertebral Joints with Interbody Fusion Device, Posterior Approach, Anterior Column, Percutaneous Approach          | Major spine surgery |
| ORG73J0 | ICD-10 Procedure | Fusion of 2 to 7 Thoracic Vertebral Joints with Synthetic Substitute, Anterior Approach, Anterior Column, Percutaneous Approach              | Major spine surgery |
| ORG73J1 | ICD-10 Procedure | Fusion of 2 to 7 Thoracic Vertebral Joints with Synthetic Substitute, Posterior Approach, Posterior Column, Percutaneous Approach            | Major spine surgery |
| ORG73JJ | ICD-10 Procedure | Fusion of 2 to 7 Thoracic Vertebral Joints with Synthetic Substitute, Posterior Approach, Anterior Column, Percutaneous Approach             | Major spine surgery |
| ORG73K0 | ICD-10 Procedure | Fusion of 2 to 7 Thoracic Vertebral Joints with Nonautologous Tissue Substitute, Anterior Approach, Anterior Column, Percutaneous Approach   | Major spine surgery |
| ORG73K1 | ICD-10 Procedure | Fusion of 2 to 7 Thoracic Vertebral Joints with Nonautologous Tissue Substitute, Posterior Approach, Posterior Column, Percutaneous Approach | Major spine surgery |
| ORG73KJ | ICD-10 Procedure | Fusion of 2 to 7 Thoracic Vertebral Joints with Nonautologous Tissue Substitute, Posterior Approach, Anterior Column, Percutaneous Approach  | Major spine surgery |
| ORG73Z0 | ICD-10 Procedure | Fusion of 2 to 7 Thoracic Vertebral Joints, Anterior Approach, Anterior Column, Percutaneous Approach                                        | Major spine surgery |



|         |                  |                                                                                                                                                      |                     |
|---------|------------------|------------------------------------------------------------------------------------------------------------------------------------------------------|---------------------|
| ORG73Z1 | ICD-10 Procedure | Fusion of 2 to 7 Thoracic Vertebral Joints, Posterior Approach, Posterior Column, Percutaneous Approach                                              | Major spine surgery |
| ORG73ZJ | ICD-10 Procedure | Fusion of 2 to 7 Thoracic Vertebral Joints, Posterior Approach, Anterior Column, Percutaneous Approach                                               | Major spine surgery |
| ORG7470 | ICD-10 Procedure | Fusion of 2 to 7 Thoracic Vertebral Joints with Autologous Tissue Substitute, Anterior Approach, Anterior Column, Percutaneous Endoscopic Approach   | Major spine surgery |
| ORG7471 | ICD-10 Procedure | Fusion of 2 to 7 Thoracic Vertebral Joints with Autologous Tissue Substitute, Posterior Approach, Posterior Column, Percutaneous Endoscopic Approach | Major spine surgery |
| ORG747J | ICD-10 Procedure | Fusion of 2 to 7 Thoracic Vertebral Joints with Autologous Tissue Substitute, Posterior Approach, Anterior Column, Percutaneous Endoscopic Approach  | Major spine surgery |
| ORG74A0 | ICD-10 Procedure | Fusion of 2 to 7 Thoracic Vertebral Joints with Interbody Fusion Device, Anterior Approach, Anterior Column, Percutaneous Endoscopic Approach        | Major spine surgery |
| ORG74A1 | ICD-10 Procedure | Fusion of 2 to 7 Thoracic Vertebral Joints with Interbody Fusion Device, Posterior Approach, Posterior Column, Percutaneous Endoscopic Approach      | Major spine surgery |
| ORG74AJ | ICD-10 Procedure | Fusion of 2 to 7 Thoracic Vertebral Joints with Interbody Fusion Device, Posterior Approach, Anterior Column, Percutaneous Endoscopic Approach       | Major spine surgery |
| ORG74J0 | ICD-10 Procedure | Fusion of 2 to 7 Thoracic Vertebral Joints with Synthetic Substitute, Anterior Approach, Anterior Column, Percutaneous Endoscopic Approach           | Major spine surgery |
| ORG74J1 | ICD-10 Procedure | Fusion of 2 to 7 Thoracic Vertebral Joints with Synthetic Substitute, Posterior Approach, Posterior Column, Percutaneous Endoscopic Approach         | Major spine surgery |

|         |                  |                                                                                                                                                         |                     |
|---------|------------------|---------------------------------------------------------------------------------------------------------------------------------------------------------|---------------------|
| ORG74JJ | ICD-10 Procedure | Fusion of 2 to 7 Thoracic Vertebral Joints with Synthetic Substitute, Posterior Approach, Anterior Column, Percutaneous Endoscopic Approach             | Major spine surgery |
| ORG74K0 | ICD-10 Procedure | Fusion of 2 to 7 Thoracic Vertebral Joints with Nonautologous Tissue Substitute, Anterior Approach, Anterior Column, Percutaneous Endoscopic Approach   | Major spine surgery |
| ORG74K1 | ICD-10 Procedure | Fusion of 2 to 7 Thoracic Vertebral Joints with Nonautologous Tissue Substitute, Posterior Approach, Posterior Column, Percutaneous Endoscopic Approach | Major spine surgery |
| ORG74KJ | ICD-10 Procedure | Fusion of 2 to 7 Thoracic Vertebral Joints with Nonautologous Tissue Substitute, Posterior Approach, Anterior Column, Percutaneous Endoscopic Approach  | Major spine surgery |
| ORG74Z0 | ICD-10 Procedure | Fusion of 2 to 7 Thoracic Vertebral Joints, Anterior Approach, Anterior Column, Percutaneous Endoscopic Approach                                        | Major spine surgery |
| ORG74Z1 | ICD-10 Procedure | Fusion of 2 to 7 Thoracic Vertebral Joints, Posterior Approach, Posterior Column, Percutaneous Endoscopic Approach                                      | Major spine surgery |
| ORG74ZJ | ICD-10 Procedure | Fusion of 2 to 7 Thoracic Vertebral Joints, Posterior Approach, Anterior Column, Percutaneous Endoscopic Approach                                       | Major spine surgery |
| ORG8070 | ICD-10 Procedure | Fusion of 8 or more Thoracic Vertebral Joints with Autologous Tissue Substitute, Anterior Approach, Anterior Column, Open Approach                      | Major spine surgery |
| ORG8071 | ICD-10 Procedure | Fusion of 8 or more Thoracic Vertebral Joints with Autologous Tissue Substitute, Posterior Approach, Posterior Column, Open Approach                    | Major spine surgery |
| ORG807J | ICD-10 Procedure | Fusion of 8 or more Thoracic Vertebral Joints with Autologous Tissue Substitute, Posterior Approach, Anterior Column, Open Approach                     | Major spine surgery |

|         |                  |                                                                                                                                         |                     |
|---------|------------------|-----------------------------------------------------------------------------------------------------------------------------------------|---------------------|
| ORG80A0 | ICD-10 Procedure | Fusion of 8 or more Thoracic Vertebral Joints with Interbody Fusion Device, Anterior Approach, Anterior Column, Open Approach           | Major spine surgery |
| ORG80A1 | ICD-10 Procedure | Fusion of 8 or more Thoracic Vertebral Joints with Interbody Fusion Device, Posterior Approach, Posterior Column, Open Approach         | Major spine surgery |
| ORG80AJ | ICD-10 Procedure | Fusion of 8 or more Thoracic Vertebral Joints with Interbody Fusion Device, Posterior Approach, Anterior Column, Open Approach          | Major spine surgery |
| ORG80J0 | ICD-10 Procedure | Fusion of 8 or more Thoracic Vertebral Joints with Synthetic Substitute, Anterior Approach, Anterior Column, Open Approach              | Major spine surgery |
| ORG80J1 | ICD-10 Procedure | Fusion of 8 or more Thoracic Vertebral Joints with Synthetic Substitute, Posterior Approach, Posterior Column, Open Approach            | Major spine surgery |
| ORG80JJ | ICD-10 Procedure | Fusion of 8 or more Thoracic Vertebral Joints with Synthetic Substitute, Posterior Approach, Anterior Column, Open Approach             | Major spine surgery |
| ORG80K0 | ICD-10 Procedure | Fusion of 8 or more Thoracic Vertebral Joints with Nonautologous Tissue Substitute, Anterior Approach, Anterior Column, Open Approach   | Major spine surgery |
| ORG80K1 | ICD-10 Procedure | Fusion of 8 or more Thoracic Vertebral Joints with Nonautologous Tissue Substitute, Posterior Approach, Posterior Column, Open Approach | Major spine surgery |
| ORG80KJ | ICD-10 Procedure | Fusion of 8 or more Thoracic Vertebral Joints with Nonautologous Tissue Substitute, Posterior Approach, Anterior Column, Open Approach  | Major spine surgery |
| ORG80Z0 | ICD-10 Procedure | Fusion of 8 or more Thoracic Vertebral Joints, Anterior Approach, Anterior Column, Open Approach                                        | Major spine surgery |
| ORG80Z1 | ICD-10 Procedure | Fusion of 8 or more Thoracic Vertebral Joints, Posterior Approach, Posterior Column, Open Approach                                      | Major spine surgery |

|         |                  |                                                                                                                                              |                     |
|---------|------------------|----------------------------------------------------------------------------------------------------------------------------------------------|---------------------|
| ORG80ZJ | ICD-10 Procedure | Fusion of 8 or more Thoracic Vertebral Joints, Posterior Approach, Anterior Column, Open Approach                                            | Major spine surgery |
| ORG8370 | ICD-10 Procedure | Fusion of 8 or more Thoracic Vertebral Joints with Autologous Tissue Substitute, Anterior Approach, Anterior Column, Percutaneous Approach   | Major spine surgery |
| ORG8371 | ICD-10 Procedure | Fusion of 8 or more Thoracic Vertebral Joints with Autologous Tissue Substitute, Posterior Approach, Posterior Column, Percutaneous Approach | Major spine surgery |
| ORG837J | ICD-10 Procedure | Fusion of 8 or more Thoracic Vertebral Joints with Autologous Tissue Substitute, Posterior Approach, Anterior Column, Percutaneous Approach  | Major spine surgery |
| ORG83A0 | ICD-10 Procedure | Fusion of 8 or more Thoracic Vertebral Joints with Interbody Fusion Device, Anterior Approach, Anterior Column, Percutaneous Approach        | Major spine surgery |
| ORG83A1 | ICD-10 Procedure | Fusion of 8 or more Thoracic Vertebral Joints with Interbody Fusion Device, Posterior Approach, Posterior Column, Percutaneous Approach      | Major spine surgery |
| ORG83AJ | ICD-10 Procedure | Fusion of 8 or more Thoracic Vertebral Joints with Interbody Fusion Device, Posterior Approach, Anterior Column, Percutaneous Approach       | Major spine surgery |
| ORG83J0 | ICD-10 Procedure | Fusion of 8 or more Thoracic Vertebral Joints with Synthetic Substitute, Anterior Approach, Anterior Column, Percutaneous Approach           | Major spine surgery |
| ORG83J1 | ICD-10 Procedure | Fusion of 8 or more Thoracic Vertebral Joints with Synthetic Substitute, Posterior Approach, Posterior Column, Percutaneous Approach         | Major spine surgery |

|         |                  |                                                                                                                                                         |                     |
|---------|------------------|---------------------------------------------------------------------------------------------------------------------------------------------------------|---------------------|
| ORG83JJ | ICD-10 Procedure | Fusion of 8 or more Thoracic Vertebral Joints with Synthetic Substitute, Posterior Approach, Anterior Column, Percutaneous Approach                     | Major spine surgery |
| ORG83K0 | ICD-10 Procedure | Fusion of 8 or more Thoracic Vertebral Joints with Nonautologous Tissue Substitute, Anterior Approach, Anterior Column, Percutaneous Approach           | Major spine surgery |
| ORG83K1 | ICD-10 Procedure | Fusion of 8 or more Thoracic Vertebral Joints with Nonautologous Tissue Substitute, Posterior Approach, Posterior Column, Percutaneous Approach         | Major spine surgery |
| ORG83KJ | ICD-10 Procedure | Fusion of 8 or more Thoracic Vertebral Joints with Nonautologous Tissue Substitute, Posterior Approach, Anterior Column, Percutaneous Approach          | Major spine surgery |
| ORG83Z0 | ICD-10 Procedure | Fusion of 8 or more Thoracic Vertebral Joints, Anterior Approach, Anterior Column, Percutaneous Approach                                                | Major spine surgery |
| ORG83Z1 | ICD-10 Procedure | Fusion of 8 or more Thoracic Vertebral Joints, Posterior Approach, Posterior Column, Percutaneous Approach                                              | Major spine surgery |
| ORG83ZJ | ICD-10 Procedure | Fusion of 8 or more Thoracic Vertebral Joints, Posterior Approach, Anterior Column, Percutaneous Approach                                               | Major spine surgery |
| ORG8470 | ICD-10 Procedure | Fusion of 8 or more Thoracic Vertebral Joints with Autologous Tissue Substitute, Anterior Approach, Anterior Column, Percutaneous Endoscopic Approach   | Major spine surgery |
| ORG8471 | ICD-10 Procedure | Fusion of 8 or more Thoracic Vertebral Joints with Autologous Tissue Substitute, Posterior Approach, Posterior Column, Percutaneous Endoscopic Approach | Major spine surgery |
| ORG847J | ICD-10 Procedure | Fusion of 8 or more Thoracic Vertebral Joints with Autologous Tissue Substitute, Posterior Approach, Anterior Column, Percutaneous Endoscopic Approach  | Major spine surgery |

|         |                  |                                                                                                                                                            |                     |
|---------|------------------|------------------------------------------------------------------------------------------------------------------------------------------------------------|---------------------|
| ORG84A0 | ICD-10 Procedure | Fusion of 8 or more Thoracic Vertebral Joints with Interbody Fusion Device, Anterior Approach, Anterior Column, Percutaneous Endoscopic Approach           | Major spine surgery |
| ORG84A1 | ICD-10 Procedure | Fusion of 8 or more Thoracic Vertebral Joints with Interbody Fusion Device, Posterior Approach, Posterior Column, Percutaneous Endoscopic Approach         | Major spine surgery |
| ORG84AJ | ICD-10 Procedure | Fusion of 8 or more Thoracic Vertebral Joints with Interbody Fusion Device, Posterior Approach, Anterior Column, Percutaneous Endoscopic Approach          | Major spine surgery |
| ORG84JO | ICD-10 Procedure | Fusion of 8 or more Thoracic Vertebral Joints with Synthetic Substitute, Anterior Approach, Anterior Column, Percutaneous Endoscopic Approach              | Major spine surgery |
| ORG84J1 | ICD-10 Procedure | Fusion of 8 or more Thoracic Vertebral Joints with Synthetic Substitute, Posterior Approach, Posterior Column, Percutaneous Endoscopic Approach            | Major spine surgery |
| ORG84JJ | ICD-10 Procedure | Fusion of 8 or more Thoracic Vertebral Joints with Synthetic Substitute, Posterior Approach, Anterior Column, Percutaneous Endoscopic Approach             | Major spine surgery |
| ORG84K0 | ICD-10 Procedure | Fusion of 8 or more Thoracic Vertebral Joints with Nonautologous Tissue Substitute, Anterior Approach, Anterior Column, Percutaneous Endoscopic Approach   | Major spine surgery |
| ORG84K1 | ICD-10 Procedure | Fusion of 8 or more Thoracic Vertebral Joints with Nonautologous Tissue Substitute, Posterior Approach, Posterior Column, Percutaneous Endoscopic Approach | Major spine surgery |

|         |                  |                                                                                                                                                        |                     |
|---------|------------------|--------------------------------------------------------------------------------------------------------------------------------------------------------|---------------------|
| ORG84KJ | ICD-10 Procedure | Fusion of 8 or more Thoracic Vertebral Joints with Nonautologous Tissue Substitute, Posterior Approach, Anterior Column, Percutaneous Endoscopic Appro | Major spine surgery |
| ORG84Z0 | ICD-10 Procedure | Fusion of 8 or more Thoracic Vertebral Joints, Anterior Approach, Anterior Column, Percutaneous Endoscopic Approach                                    | Major spine surgery |
| ORG84Z1 | ICD-10 Procedure | Fusion of 8 or more Thoracic Vertebral Joints, Posterior Approach, Posterior Column, Percutaneous Endoscopic Approach                                  | Major spine surgery |
| ORG84ZJ | ICD-10 Procedure | Fusion of 8 or more Thoracic Vertebral Joints, Posterior Approach, Anterior Column, Percutaneous Endoscopic Approach                                   | Major spine surgery |
| ORGA070 | ICD-10 Procedure | Fusion of Thoracolumbar Vertebral Joint with Autologous Tissue Substitute, Anterior Approach, Anterior Column, Open Approach                           | Major spine surgery |
| ORGA071 | ICD-10 Procedure | Fusion of Thoracolumbar Vertebral Joint with Autologous Tissue Substitute, Posterior Approach, Posterior Column, Open Approach                         | Major spine surgery |
| ORGA07J | ICD-10 Procedure | Fusion of Thoracolumbar Vertebral Joint with Autologous Tissue Substitute, Posterior Approach, Anterior Column, Open Approach                          | Major spine surgery |
| ORGA0A0 | ICD-10 Procedure | Fusion of Thoracolumbar Vertebral Joint with Interbody Fusion Device, Anterior Approach, Anterior Column, Open Approach                                | Major spine surgery |
| ORGA0A1 | ICD-10 Procedure | Fusion of Thoracolumbar Vertebral Joint with Interbody Fusion Device, Posterior Approach, Posterior Column, Open Approach                              | Major spine surgery |
| ORGA0AJ | ICD-10 Procedure | Fusion of Thoracolumbar Vertebral Joint with Interbody Fusion Device, Posterior Approach, Anterior Column, Open Approach                               | Major spine surgery |
| ORGA0JO | ICD-10 Procedure | Fusion of Thoracolumbar Vertebral Joint with Synthetic Substitute, Anterior Approach, Anterior Column, Open Approach                                   | Major spine surgery |

|         |                  |                                                                                                                                        |                     |
|---------|------------------|----------------------------------------------------------------------------------------------------------------------------------------|---------------------|
| ORGA0J1 | ICD-10 Procedure | Fusion of Thoracolumbar Vertebral Joint with Synthetic Substitute, Posterior Approach, Posterior Column, Open Approach                 | Major spine surgery |
| ORGA0JJ | ICD-10 Procedure | Fusion of Thoracolumbar Vertebral Joint with Synthetic Substitute, Posterior Approach, Anterior Column, Open Approach                  | Major spine surgery |
| ORGA0K0 | ICD-10 Procedure | Fusion of Thoracolumbar Vertebral Joint with Nonautologous Tissue Substitute, Anterior Approach, Anterior Column, Open Approach        | Major spine surgery |
| ORGA0K1 | ICD-10 Procedure | Fusion of Thoracolumbar Vertebral Joint with Nonautologous Tissue Substitute, Posterior Approach, Posterior Column, Open Approach      | Major spine surgery |
| ORGA0KJ | ICD-10 Procedure | Fusion of Thoracolumbar Vertebral Joint with Nonautologous Tissue Substitute, Posterior Approach, Anterior Column, Open Approach       | Major spine surgery |
| ORGA0Z0 | ICD-10 Procedure | Fusion of Thoracolumbar Vertebral Joint, Anterior Approach, Anterior Column, Open Approach                                             | Major spine surgery |
| ORGA0Z1 | ICD-10 Procedure | Fusion of Thoracolumbar Vertebral Joint, Posterior Approach, Posterior Column, Open Approach                                           | Major spine surgery |
| ORGA0ZJ | ICD-10 Procedure | Fusion of Thoracolumbar Vertebral Joint, Posterior Approach, Anterior Column, Open Approach                                            | Major spine surgery |
| ORGA370 | ICD-10 Procedure | Fusion of Thoracolumbar Vertebral Joint with Autologous Tissue Substitute, Anterior Approach, Anterior Column, Percutaneous Approach   | Major spine surgery |
| ORGA371 | ICD-10 Procedure | Fusion of Thoracolumbar Vertebral Joint with Autologous Tissue Substitute, Posterior Approach, Posterior Column, Percutaneous Approach | Major spine surgery |
| ORGA37J | ICD-10 Procedure | Fusion of Thoracolumbar Vertebral Joint with Autologous Tissue Substitute, Posterior Approach, Anterior Column, Percutaneous Approach  | Major spine surgery |



|         |                  |                                                                                                                                           |                     |
|---------|------------------|-------------------------------------------------------------------------------------------------------------------------------------------|---------------------|
| ORGA3A0 | ICD-10 Procedure | Fusion of Thoracolumbar Vertebral Joint with Interbody Fusion Device, Anterior Approach, Anterior Column, Percutaneous Approach           | Major spine surgery |
| ORGA3A1 | ICD-10 Procedure | Fusion of Thoracolumbar Vertebral Joint with Interbody Fusion Device, Posterior Approach, Posterior Column, Percutaneous Approach         | Major spine surgery |
| ORGA3AJ | ICD-10 Procedure | Fusion of Thoracolumbar Vertebral Joint with Interbody Fusion Device, Posterior Approach, Anterior Column, Percutaneous Approach          | Major spine surgery |
| ORGA3JO | ICD-10 Procedure | Fusion of Thoracolumbar Vertebral Joint with Synthetic Substitute, Anterior Approach, Anterior Column, Percutaneous Approach              | Major spine surgery |
| ORGA3J1 | ICD-10 Procedure | Fusion of Thoracolumbar Vertebral Joint with Synthetic Substitute, Posterior Approach, Posterior Column, Percutaneous Approach            | Major spine surgery |
| ORGA3JJ | ICD-10 Procedure | Fusion of Thoracolumbar Vertebral Joint with Synthetic Substitute, Posterior Approach, Anterior Column, Percutaneous Approach             | Major spine surgery |
| ORGA3K0 | ICD-10 Procedure | Fusion of Thoracolumbar Vertebral Joint with Nonautologous Tissue Substitute, Anterior Approach, Anterior Column, Percutaneous Approach   | Major spine surgery |
| ORGA3K1 | ICD-10 Procedure | Fusion of Thoracolumbar Vertebral Joint with Nonautologous Tissue Substitute, Posterior Approach, Posterior Column, Percutaneous Approach | Major spine surgery |
| ORGA3KJ | ICD-10 Procedure | Fusion of Thoracolumbar Vertebral Joint with Nonautologous Tissue Substitute, Posterior Approach, Anterior Column, Percutaneous Approach  | Major spine surgery |
| ORGA3ZO | ICD-10 Procedure | Fusion of Thoracolumbar Vertebral Joint, Anterior Approach, Anterior Column, Percutaneous Approach                                        | Major spine surgery |
| ORGA3Z1 | ICD-10 Procedure | Fusion of Thoracolumbar Vertebral Joint, Posterior Approach, Posterior Column, Percutaneous Approach                                      | Major spine surgery |

|         |                  |                                                                                                                                                   |                     |
|---------|------------------|---------------------------------------------------------------------------------------------------------------------------------------------------|---------------------|
| ORGA3ZJ | ICD-10 Procedure | Fusion of Thoracolumbar Vertebral Joint, Posterior Approach, Anterior Column, Percutaneous Approach                                               | Major spine surgery |
| ORGA470 | ICD-10 Procedure | Fusion of Thoracolumbar Vertebral Joint with Autologous Tissue Substitute, Anterior Approach, Anterior Column, Percutaneous Endoscopic Approach   | Major spine surgery |
| ORGA471 | ICD-10 Procedure | Fusion of Thoracolumbar Vertebral Joint with Autologous Tissue Substitute, Posterior Approach, Posterior Column, Percutaneous Endoscopic Approach | Major spine surgery |
| ORGA47J | ICD-10 Procedure | Fusion of Thoracolumbar Vertebral Joint with Autologous Tissue Substitute, Posterior Approach, Anterior Column, Percutaneous Endoscopic Approach  | Major spine surgery |
| ORGA4A0 | ICD-10 Procedure | Fusion of Thoracolumbar Vertebral Joint with Interbody Fusion Device, Anterior Approach, Anterior Column, Percutaneous Endoscopic Approach        | Major spine surgery |
| ORGA4A1 | ICD-10 Procedure | Fusion of Thoracolumbar Vertebral Joint with Interbody Fusion Device, Posterior Approach, Posterior Column, Percutaneous Endoscopic Approach      | Major spine surgery |
| ORGA4AJ | ICD-10 Procedure | Fusion of Thoracolumbar Vertebral Joint with Interbody Fusion Device, Posterior Approach, Anterior Column, Percutaneous Endoscopic Approach       | Major spine surgery |
| ORGA4J0 | ICD-10 Procedure | Fusion of Thoracolumbar Vertebral Joint with Synthetic Substitute, Anterior Approach, Anterior Column, Percutaneous Endoscopic Approach           | Major spine surgery |
| ORGA4J1 | ICD-10 Procedure | Fusion of Thoracolumbar Vertebral Joint with Synthetic Substitute, Posterior Approach, Posterior Column, Percutaneous Endoscopic Approach         | Major spine surgery |

|         |                  |                                                                                                                                                      |                     |
|---------|------------------|------------------------------------------------------------------------------------------------------------------------------------------------------|---------------------|
| ORGA4JJ | ICD-10 Procedure | Fusion of Thoracolumbar Vertebral Joint with Synthetic Substitute, Posterior Approach, Anterior Column, Percutaneous Endoscopic Approach             | Major spine surgery |
| ORGA4K0 | ICD-10 Procedure | Fusion of Thoracolumbar Vertebral Joint with Nonautologous Tissue Substitute, Anterior Approach, Anterior Column, Percutaneous Endoscopic Approach   | Major spine surgery |
| ORGA4K1 | ICD-10 Procedure | Fusion of Thoracolumbar Vertebral Joint with Nonautologous Tissue Substitute, Posterior Approach, Posterior Column, Percutaneous Endoscopic Approach | Major spine surgery |
| ORGA4KJ | ICD-10 Procedure | Fusion of Thoracolumbar Vertebral Joint with Nonautologous Tissue Substitute, Posterior Approach, Anterior Column, Percutaneous Endoscopic Approach  | Major spine surgery |
| ORGA4Z0 | ICD-10 Procedure | Fusion of Thoracolumbar Vertebral Joint, Anterior Approach, Anterior Column, Percutaneous Endoscopic Approach                                        | Major spine surgery |
| ORGA4Z1 | ICD-10 Procedure | Fusion of Thoracolumbar Vertebral Joint, Posterior Approach, Posterior Column, Percutaneous Endoscopic Approach                                      | Major spine surgery |
| ORGA4ZJ | ICD-10 Procedure | Fusion of Thoracolumbar Vertebral Joint, Posterior Approach, Anterior Column, Percutaneous Endoscopic Approach                                       | Major spine surgery |
| M4320   | ICD-10 Diagnosis | Fusion of spine, site unspecified                                                                                                                    | Major spine surgery |
| M4322   | ICD-10 Diagnosis | Fusion of spine, cervical region                                                                                                                     | Major spine surgery |
| M4323   | ICD-10 Diagnosis | Fusion of spine, cervicothoracic region                                                                                                              | Major spine surgery |
| M4324   | ICD-10 Diagnosis | Fusion of spine, thoracic region                                                                                                                     | Major spine surgery |
| M4325   | ICD-10 Diagnosis | Fusion of spine, thoracolumbar region                                                                                                                | Major spine surgery |
| M4326   | ICD-10 Diagnosis | Fusion of spine, lumbar region                                                                                                                       | Major spine surgery |
| M4327   | ICD-10 Diagnosis | Fusion of spine, lumbosacral region                                                                                                                  | Major spine surgery |
| G9511   | ICD-10 Diagnosis | Acute infarction of spinal cord (embolic) (nonembolic)                                                                                               | Adverse events      |
| M0008   | ICD-10 Diagnosis | Staphylococcal arthritis, vertebrae                                                                                                                  | Adverse events      |
| M4630   | ICD-10 Diagnosis | Infection of intervertebral disc (pyogenic), site unspecified                                                                                        | Adverse events      |

|         |                  |                                                                                                    |                |
|---------|------------------|----------------------------------------------------------------------------------------------------|----------------|
| M4633   | ICD-10 Diagnosis | Infection of intervertebral disc (pyogenic), cervicothoracic region                                | Adverse events |
| M4634   | ICD-10 Diagnosis | Infection of intervertebral disc (pyogenic), thoracic region                                       | Adverse events |
| M4635   | ICD-10 Diagnosis | Infection of intervertebral disc (pyogenic), thoracolumbar region                                  | Adverse events |
| M4636   | ICD-10 Diagnosis | Infection of intervertebral disc (pyogenic), lumbar region                                         | Adverse events |
| M4637   | ICD-10 Diagnosis | Infection of intervertebral disc (pyogenic), lumbosacral region                                    | Adverse events |
| M4640   | ICD-10 Diagnosis | Discitis, unspecified, site unspecified                                                            | Adverse events |
| M4643   | ICD-10 Diagnosis | Discitis, unspecified, cervicothoracic region                                                      | Adverse events |
| M4644   | ICD-10 Diagnosis | Discitis, unspecified, thoracic region                                                             | Adverse events |
| M4645   | ICD-10 Diagnosis | Discitis, unspecified, thoracolumbar region                                                        | Adverse events |
| M4646   | ICD-10 Diagnosis | Discitis, unspecified, lumbar region                                                               | Adverse events |
| M4647   | ICD-10 Diagnosis | Discitis, unspecified, lumbosacral region                                                          | Adverse events |
| M4649   | ICD-10 Diagnosis | Discitis, unspecified, multiple sites in spine                                                     | Adverse events |
| M4650   | ICD-10 Diagnosis | Other infective spondylopathies, site unspecified                                                  | Adverse events |
| M4654   | ICD-10 Diagnosis | Other infective spondylopathies, thoracic region                                                   | Adverse events |
| M4655   | ICD-10 Diagnosis | Other infective spondylopathies, thoracolumbar region                                              | Adverse events |
| M4656   | ICD-10 Diagnosis | Other infective spondylopathies, lumbar region                                                     | Adverse events |
| M4657   | ICD-10 Diagnosis | Other infective spondylopathies, lumbosacral region                                                | Adverse events |
| T8463XA | ICD-10 Diagnosis | Infection and inflammatory reaction due to internal fixation device of spine, initial encounter    | Adverse events |
| T8463XD | ICD-10 Diagnosis | Infection and inflammatory reaction due to internal fixation device of spine, subsequent encounter | Adverse events |
| T8463XS | ICD-10 Diagnosis | Infection and inflammatory reaction due to internal fixation device of spine, sequela              | Adverse events |
| G834    | ICD-10 Diagnosis | Cauda equina syndrome                                                                              | Adverse events |
| G8381   | ICD-10 Diagnosis | Brown-Sequard syndrome                                                                             | Adverse events |
| G8382   | ICD-10 Diagnosis | Anterior cord syndrome                                                                             | Adverse events |
| G8383   | ICD-10 Diagnosis | Posterior cord syndrome                                                                            | Adverse events |
| G9520   | ICD-10 Diagnosis | Unspecified cord compression                                                                       | Adverse events |
| G9529   | ICD-10 Diagnosis | Other cord compression                                                                             | Adverse events |

|        |                  |                                                                      |                |
|--------|------------------|----------------------------------------------------------------------|----------------|
| G9581  | ICD-10 Diagnosis | Conus medullaris syndrome                                            | Adverse events |
| M47013 | ICD-10 Diagnosis | Anterior spinal artery compression syndromes, cervicothoracic region | Adverse events |
| M47014 | ICD-10 Diagnosis | Anterior spinal artery compression syndromes, thoracic region        | Adverse events |
| M47016 | ICD-10 Diagnosis | Anterior spinal artery compression syndromes, lumbar region          | Adverse events |
| M47019 | ICD-10 Diagnosis | Anterior spinal artery compression syndromes, site unspecified       | Adverse events |
| S2410  | ICD-10 Diagnosis | Unspecified injury at T1 level of thoracic spinal cord               | Adverse events |
| S2411  | ICD-10 Diagnosis | Complete lesion at T1 level of thoracic spinal cord                  | Adverse events |
| S2413  | ICD-10 Diagnosis | Anterior cord syndrome at T1 level of thoracic spinal cord           | Adverse events |
| S2414  | ICD-10 Diagnosis | Brown-Séquard syndrome of thoracic spinal cord                       | Adverse events |
| S2415  | ICD-10 Diagnosis | Other incomplete lesion at T1 level of thoracic spinal cord          | Adverse events |
| S3410  | ICD-10 Diagnosis | Unspecified injury to L1 level of lumbar spinal cord                 | Adverse events |
| S3411  | ICD-10 Diagnosis | Complete lesion of L1 level of lumbar spinal cord                    | Adverse events |
| S3412  | ICD-10 Diagnosis | Incomplete lesion of lumbar spinal cord                              | Adverse events |
| S343   | ICD-10 Diagnosis | Injury of cauda equina                                               | Adverse events |

**eTable 2. Definition of control groups of patients who did not receive augmentation procedures that were contrasted with those who received kyphoplasty.**

|                 | Propensity Matching Variables                                                                                                                                                                                                                                                                                                                                                                                                                                                                                                                                                                                                                                                                                                                                                                     | Exact Matching Variables                                                                                                                                                                                                                         | Additional Exclusions                                                                                                                                                                                                                                                                                                                     |
|-----------------|---------------------------------------------------------------------------------------------------------------------------------------------------------------------------------------------------------------------------------------------------------------------------------------------------------------------------------------------------------------------------------------------------------------------------------------------------------------------------------------------------------------------------------------------------------------------------------------------------------------------------------------------------------------------------------------------------------------------------------------------------------------------------------------------------|--------------------------------------------------------------------------------------------------------------------------------------------------------------------------------------------------------------------------------------------------|-------------------------------------------------------------------------------------------------------------------------------------------------------------------------------------------------------------------------------------------------------------------------------------------------------------------------------------------|
| Control Group 1 | None                                                                                                                                                                                                                                                                                                                                                                                                                                                                                                                                                                                                                                                                                                                                                                                              | None                                                                                                                                                                                                                                             | <ul style="list-style-type: none"> <li>• No augmentation within 180 days of index fracture</li> <li>• Between index fracture and 1 year later:               <ul style="list-style-type: none"> <li>○ No cancer diagnoses</li> <li>○ No major spine surgery</li> <li>○ No adverse events related to index fracture</li> </ul> </li> </ul> |
| Control Group 2 | <ul style="list-style-type: none"> <li>• Sex</li> <li>• Race</li> <li>• Year of index fracture</li> <li>• Whether the patient was admitted for the index fracture</li> <li>• Whether pain medications (opioids, NSAIDs, muscle relaxers, gabapentin, benzodiazepines, pregabalin) were filled in the 90 days through 1 day prior to the index fracture</li> <li>• Spinal region of the index fracture</li> <li>• Whether the state paid the individual's monthly premium</li> <li>• Number of inpatient and outpatient encounters the patient had in the year prior to the index fracture</li> <li>• Region of residence</li> <li>• Frailty score</li> <li>• Diagnoses of complications<sup>1</sup> in the year prior to fracture</li> <li>• Age</li> <li>• Charlson comorbidity score</li> </ul> | <ul style="list-style-type: none"> <li>• Fills of opioids between index fracture and kyphoplasty/pseudo-kyphoplasty</li> <li>• Receipt of advanced imaging from 6 weeks before index fracture through kyphoplasty/ pseudo-kyphoplasty</li> </ul> | <ul style="list-style-type: none"> <li>• Between index fracture and kyphoplasty/pseudo-kyphoplasty:               <ul style="list-style-type: none"> <li>○ No death</li> <li>○ No cancer diagnoses</li> <li>○ No major spine surgery</li> <li>○ No adverse events related to index fracture</li> </ul> </li> </ul>                        |
| Control Group 3 | Variables listed in control group 2                                                                                                                                                                                                                                                                                                                                                                                                                                                                                                                                                                                                                                                                                                                                                               | Variables in control group 2 plus diagnoses of complications <sup>1</sup> between index fracture and kyphoplasty/pseudo-kyphoplasty                                                                                                              | Same as control group 2                                                                                                                                                                                                                                                                                                                   |
| Control Group 4 | Variables listed in control group 2 except for age and Charlson comorbidity score                                                                                                                                                                                                                                                                                                                                                                                                                                                                                                                                                                                                                                                                                                                 | Variables in control group 3 plus age (+/- 1 year) and number of Charlson comorbidities (0, 1, 2-3, 4-5, and ≥6)                                                                                                                                 | Same as control group 2                                                                                                                                                                                                                                                                                                                   |

<sup>1</sup> Complications include cardiac arrest, acute myocardial infarction, respiratory failure, pulmonary embolism, pneumonia, stroke, patient on ventilator, patient required cardiopulmonary resuscitation, patient required intubation, deep vein thrombosis, HIV/AIDS, gastrointestinal bleeding, sepsis, coagulopathy, severe liver disease, paralysis, hip fracture, sudden weight loss, and fluid and electrolyte disorders.

eFigure 1. Conditional probability of death among unmatched patients who received kyphoplasty versus those who did not receive augmentation (control group 1).

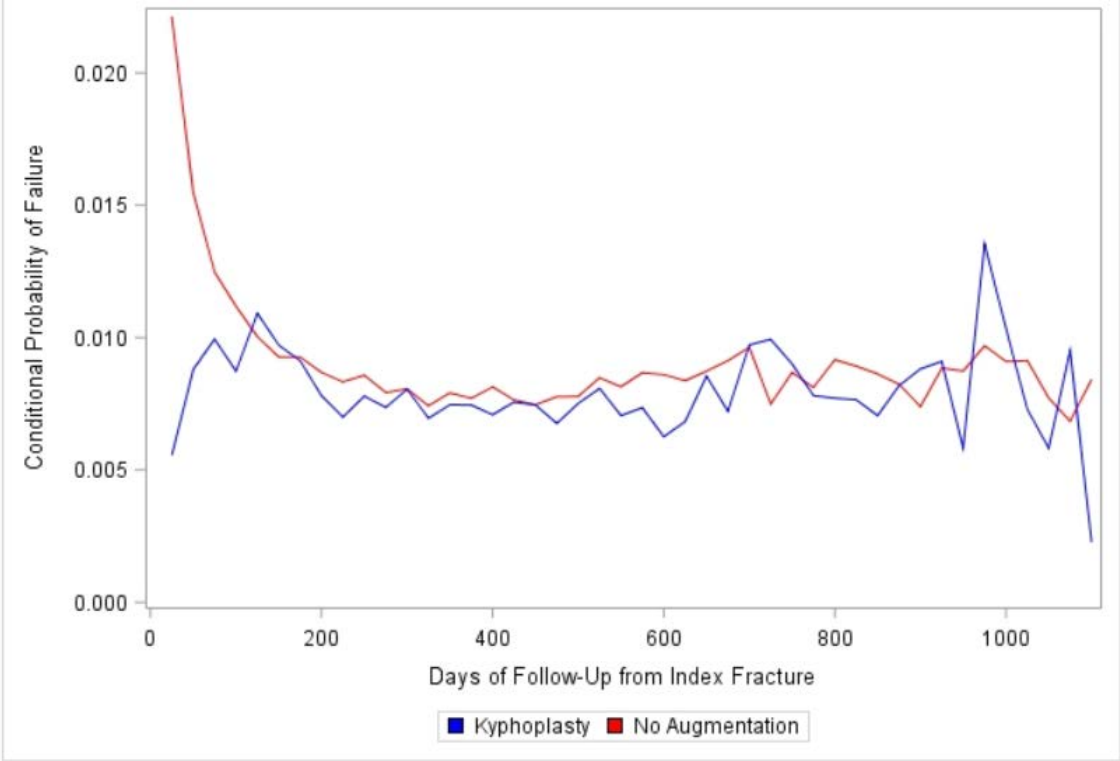

eFigure 2. Conditional probability of death among patients who received kyphoplasty versus those propensity matched with exact matching on fulfillment of opioid prescriptions and advanced imaging between fracture and kyphoplasty/pseudo-kyphoplasty who did not receive augmentation (control group 2).

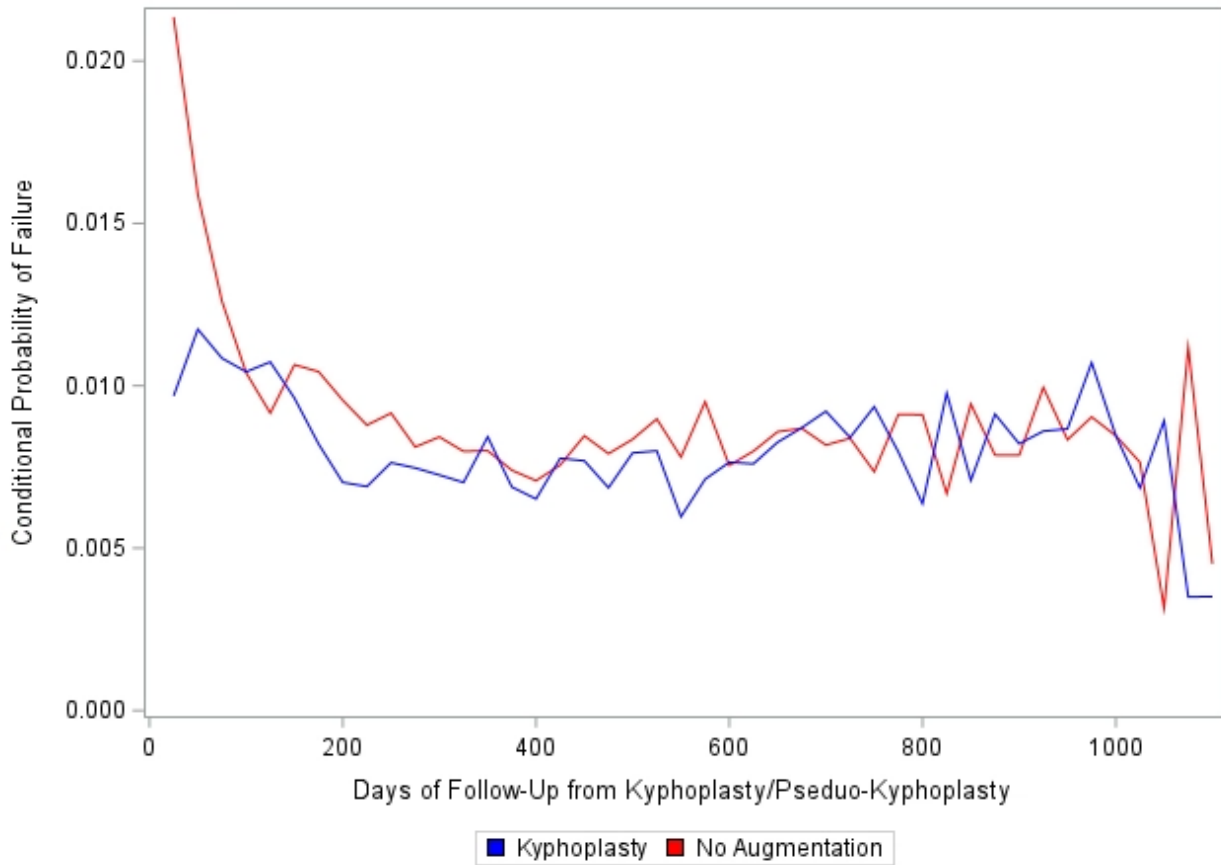



eFigure 3. Conditional probability of death among patients who received kyphoplasty versus those who did not who were propensity matched with exact matching on fulfillment of opioid prescriptions, advanced imaging, and complications between fracture and kyphoplasty/pseudo-kyphoplasty (control group 3).

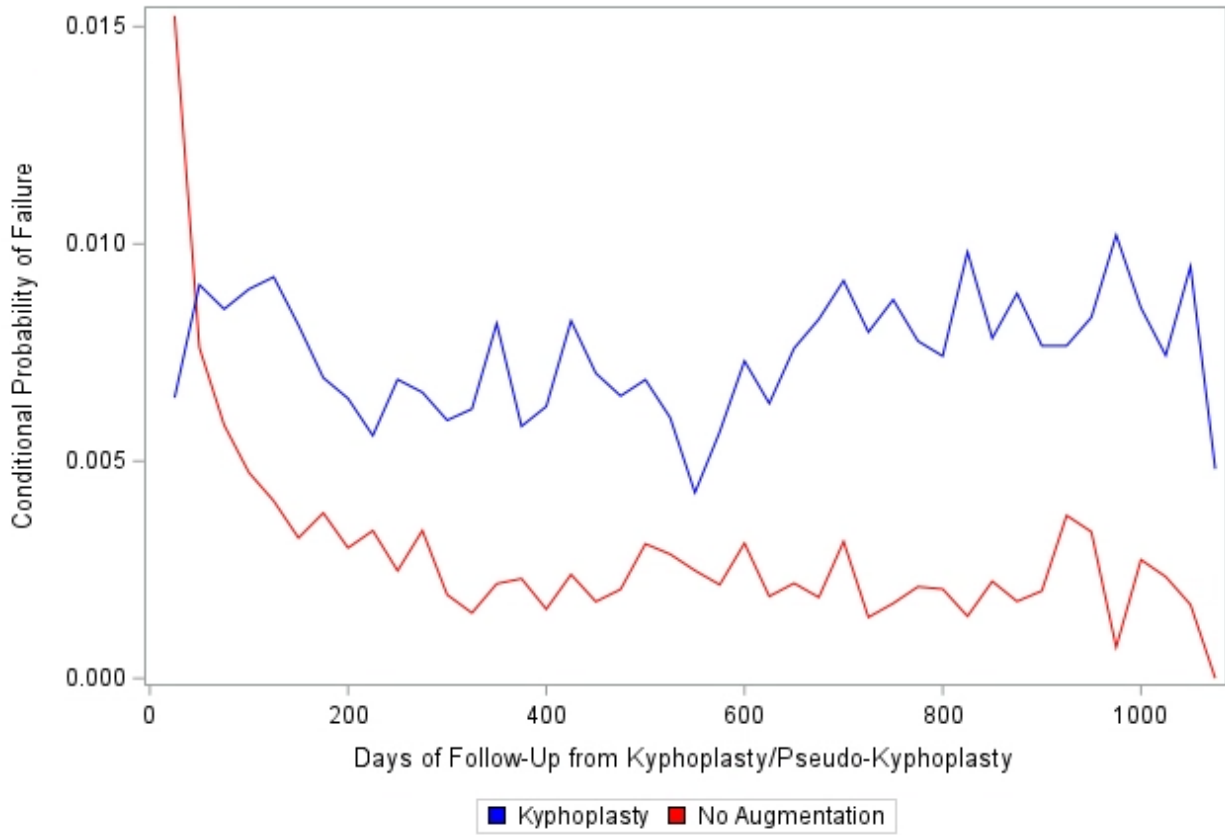

eFigure 4. Conditional probability of death among patients who received kyphoplasty versus those who did not who were propensity matched with exact matching on age ( $\pm 1$  year), number of Charlson comorbidities, fulfillment of opioid prescriptions, advanced imaging, and complications between fracture and kyphoplasty/pseudo-kyphoplasty (control group 4).

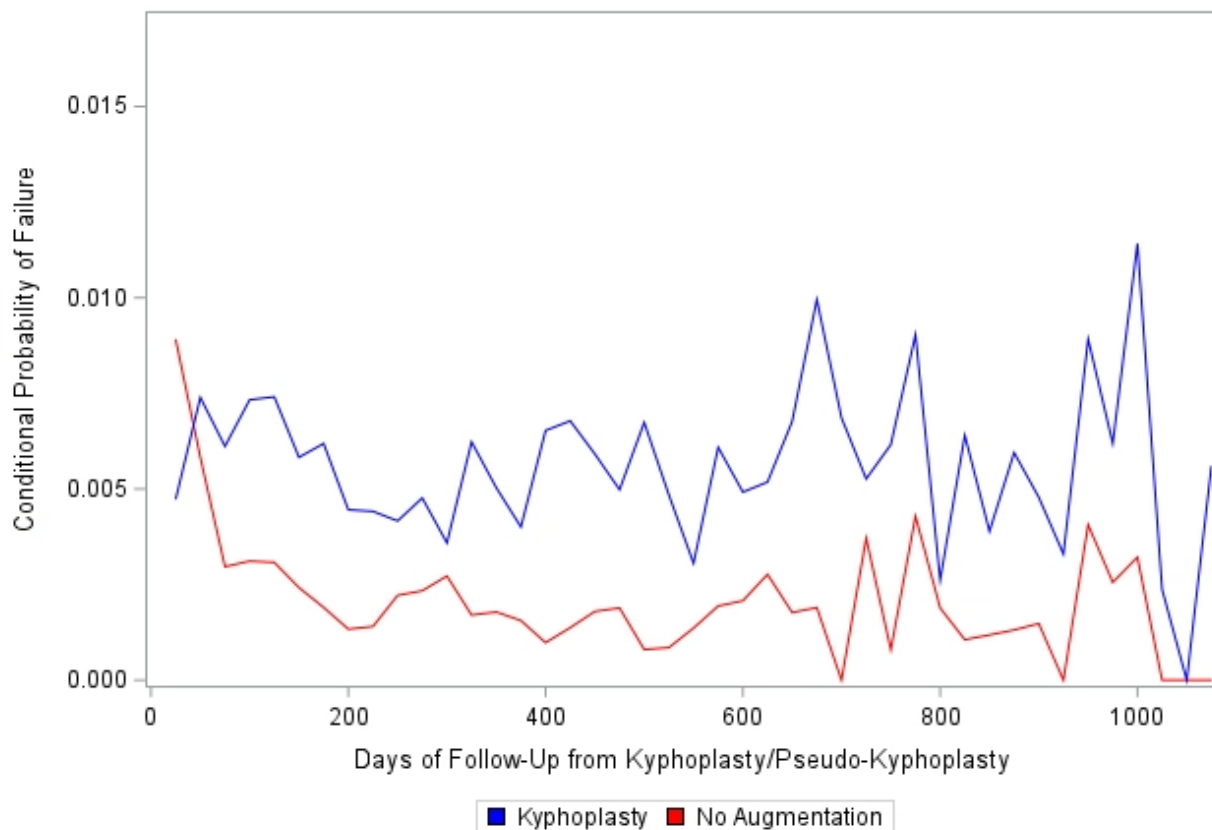

eTable 3. Comparison of patients who received kyphoplasty to propensity matched patients who did not receive augmentation. Exact match on age ( $\pm 1$  year), number of Charlson comorbidities, and whether they filled opioids, received advanced imaging, and had diagnoses of complications between fracture and kyphoplasty/pseudo-kyphoplasty (control group 4).

| <b>Variable</b>                                  | <b>No Augmentation<br/>n=6380 (50%)<br/>n (%)</b> | <b>Kyphoplasty<br/>n=6380 (50%)<br/>n (%)</b> | <b>Total<br/>n=12,760</b> |
|--------------------------------------------------|---------------------------------------------------|-----------------------------------------------|---------------------------|
| <i>Age (Median, IQR)</i>                         | 79.0 (73.4, 84.6)                                 | 78.9 (73.4, 84.6)                             | 79.0 (73.4, 85.6)         |
| <i>Female</i>                                    | 5491 (86)                                         | 5424 (85)                                     | 10,915 (86)               |
| <i>Patient race</i>                              |                                                   |                                               |                           |
| <i>Unknown</i>                                   | 65 (1)                                            | 45 (1)                                        | 110 (1)                   |
| <i>White</i>                                     | 5879 (92)                                         | 5892 (92)                                     | 11,771 (92)               |
| <i>Black</i>                                     | 84 (1)                                            | 98 (2)                                        | 182 (1)                   |
| <i>Other</i>                                     | 90 (1)                                            | 94 (1)                                        | 184 (1)                   |
| <i>Asian</i>                                     | 146 (2)                                           | 146 (2)                                       | 292 (2)                   |
| <i>Hispanic</i>                                  | 88 (1)                                            | 85 (1)                                        | 173 (1)                   |
| <i>North American Native</i>                     | 28 (0)                                            | 20 (0)                                        | 48 (0)                    |
| <i>Year of Fracture</i>                          |                                                   |                                               |                           |
| 2017                                             | 1593 (25)                                         | 2332 (37)                                     | 3925 (31)                 |
| 2018                                             | 2006 (31)                                         | 2169 (34)                                     | 4175 (33)                 |
| 2019                                             | 2781 (44)                                         | 1879 (29)                                     | 4660 (37)                 |
| <i>Charlson Co-morbidity Score (Median, IQR)</i> | 1 (0, 2)                                          | 1 (0, 2)                                      | 1 (0, 2)                  |
| 0                                                | 2089 (33)                                         | 2089 (33)                                     | 4178 (33)                 |
| 1                                                | 1669 (26)                                         | 1669 (26)                                     | 3338 (26)                 |
| 2-3                                              | 1973 (31)                                         | 1973 (31)                                     | 3946 (31)                 |
| 4-5                                              | 433 (7)                                           | 433 (7)                                       | 866 (7)                   |
| 6+                                               | 216 (3)                                           | 216 (3)                                       | 432 (3)                   |
| <i>Comorbidities in year prior to fracture</i>   |                                                   |                                               |                           |
| <i>Congestive heart failure</i>                  | 971 (15)                                          | 1104 (17)                                     | 2075 (16)                 |
| <i>Dementia</i>                                  | 506 (8)                                           | 637 (10)                                      | 1143 (9)                  |
| <i>Renal failure</i>                             | 750 (12)                                          | 696 (11)                                      | 1446 (11)                 |
| <i>Weight loss</i>                               | 303 (5)                                           | 446 (7)                                       | 749 (6)                   |
| <i>Hemiplegia</i>                                | 25 (0)                                            | 38 (1)                                        | 63 (0)                    |
| <i>Alcohol abuse</i>                             | 9 (0)                                             | 21 (0)                                        | 30 (0)                    |
| <i>Cardiac arrhythmias</i>                       | 1888 (30)                                         | 2036 (32)                                     | 3924 (31)                 |
| <i>Chronic pulmonary disease</i>                 | 1661 (26)                                         | 1770 (28)                                     | 3431 (27)                 |
| <i>Coagulopathy</i>                              | 139 (2)                                           | 209 (3)                                       | 348 (3)                   |
| <i>Complicated diabetes</i>                      | 701 (11)                                          | 614 (10)                                      | 1315 (10)                 |
| <i>Deficiency anemia</i>                         | 1222 (19)                                         | 1444 (23)                                     | 2666 (21)                 |
| <i>Fluid/electrolyte disorders</i>               | 739 (12)                                          | 1031 (16)                                     | 1770 (14)                 |
| <i>Liver disease</i>                             | 218 (3)                                           | 271 (4)                                       | 489 (4)                   |
| <i>Peripheral vascular disease</i>               | 1224 (19)                                         | 1245 (20)                                     | 2469 (19)                 |
| <i>Mood disorders</i>                            | 1170 (18)                                         | 1326 (21)                                     | 2496 (20)                 |
| <i>Pulmonary circulation disorders</i>           | 259 (4)                                           | 315 (5)                                       | 574 (5)                   |

| <b>Variable</b>                                                                                           | <b>No<br/>Augmentation<br/>n=6380 (50%)<br/>n (%)</b> | <b>Kyphoplasty<br/>n=6380 (50%)<br/>n (%)</b> | <b>Total<br/>n=12,760</b> |
|-----------------------------------------------------------------------------------------------------------|-------------------------------------------------------|-----------------------------------------------|---------------------------|
| <i>HIV/AIDS</i>                                                                                           | 0                                                     | 2 (0)                                         | 2 (0)                     |
| <i>Hypertension</i>                                                                                       | 4437 (70)                                             | 4515 (71)                                     | 8952 (70)                 |
| <i>Myocardial infarction</i>                                                                              | 200 (3)                                               | 186 (3)                                       | 386 (3)                   |
| <i>Cardiovascular disease</i>                                                                             | 900 (14)                                              | 958 (15)                                      | 1858 (15)                 |
| <i>Rheumatic disease</i>                                                                                  | 550 (9)                                               | 527 (8)                                       | 1077 (8)                  |
| <i>Peptic ulcer disease</i>                                                                               | 95 (1)                                                | 120 (2)                                       | 215 (2)                   |
| <i>Diabetes without complications</i>                                                                     | 1182 (19)                                             | 1123 (18)                                     | 2305 (18)                 |
| <i>Frailty Score<sup>1</sup></i>                                                                          | 7.0 (3.7, 12.2)                                       | 7.8 (3.9, 13.4)                               | 7.4 (3.8, 12.9)           |
| <i>Intermediate/High Frail Score</i>                                                                      | 4142 (65)                                             | 4353 (68)                                     | 8495 (67)                 |
| <i>Admitted for fracture</i>                                                                              | 763 (12)                                              | 928 (15)                                      | 1691 (13)                 |
| <i>Filled ≥1 medication from 90 days prior - fracture date</i>                                            |                                                       |                                               |                           |
| <i>Opioid</i>                                                                                             | 2077 (33)                                             | 2338 (37)                                     | 4415 (35)                 |
| <i>Muscle relaxer</i>                                                                                     | 755 (12)                                              | 783 (12)                                      | 1538 (12)                 |
| <i>Gabapentin</i>                                                                                         | 396 (6)                                               | 437 (7)                                       | 833 (7)                   |
| <i>Benzodiazepine</i>                                                                                     | 619 (10)                                              | 727 (11)                                      | 1346 (11)                 |
| <i>NSAID</i>                                                                                              | 551 (9)                                               | 549 (9)                                       | 1100 (9)                  |
| <i>Pregabalin</i>                                                                                         | 432 (7)                                               | 478 (7)                                       | 910 (7)                   |
| <i>Inpatient encounters in year prior to fracture (Median, IQR)</i>                                       | 0 (0, 0)                                              | 0 (0, 0)                                      | 0 (0, 0)                  |
| <i>Outpatient encounters in year prior to fracture (Median, IQR)</i>                                      | 4 (2, 8)                                              | 4 (2, 9)                                      | 4 (2, 9)                  |
| <i>Fracture Level</i>                                                                                     |                                                       |                                               |                           |
| <i>Lumbar</i>                                                                                             | 3125 (49)                                             | 2832 (44)                                     | 5957 (47)                 |
| <i>Thoracic</i>                                                                                           | 2052 (32)                                             | 2218 (35)                                     | 4270 (33)                 |
| <i>Thoracolumbar or Unspecified</i>                                                                       | 1203 (19)                                             | 1330 (21)                                     | 2533 (20)                 |
| <i>Patient had buy-in from state<sup>2</sup></i>                                                          | 933 (15)                                              | 1085 (17)                                     | 2018 (16)                 |
| <i>Received advanced imaging in from 6 weeks prior to fracture through kyphoplasty/pseudo-kyphoplasty</i> | 5064 (79)                                             | 5064 (79)                                     | 10,128 (79)               |
| <i>Filled prescription for opioid from fracture to kyphoplasty/pseudo-kyphoplasty</i>                     | 1975 (31)                                             | 1975 (31)                                     | 3950 (31)                 |
| <i>Complications between index fracture and kyphoplasty/pseudo-kyphoplasty</i>                            |                                                       |                                               |                           |
| Cardiac arrest                                                                                            | 0                                                     | 0                                             | 0                         |
| Acute myocardial infarction                                                                               | 4 (0)                                                 | 4 (0)                                         | 8 (0)                     |
| Respiratory failure                                                                                       | 0                                                     | 0                                             | 0                         |
| Pulmonary embolism                                                                                        | 1 (0)                                                 | 1 (0)                                         | 2 (0)                     |
| Pneumonia                                                                                                 | 7 (0)                                                 | 7 (0)                                         | 14 (0)                    |
| Stroke                                                                                                    | 4 (0)                                                 | 4 (0)                                         | 8 (0)                     |
| CPR                                                                                                       | 0                                                     | 0                                             | 0                         |

| <b>Variable</b>                                                       | <b>No<br/>Augmentation<br/>n=6380 (50%)<br/>n (%)</b> | <b>Kyphoplasty<br/>n=6380 (50%)<br/>n (%)</b> | <b>Total<br/>n=12,760</b> |
|-----------------------------------------------------------------------|-------------------------------------------------------|-----------------------------------------------|---------------------------|
| Intubation                                                            | 0                                                     | 0                                             | 0                         |
| Ventilator                                                            | 0                                                     | 0                                             | 0                         |
| Deep vein thrombosis                                                  | 0                                                     | 0                                             | 0                         |
| Hip fracture                                                          | 4 (0)                                                 | 4 (0)                                         | 8 (0)                     |
| Paralysis                                                             | 2 (0)                                                 | 2 (0)                                         | 4 (0)                     |
| Weight Loss                                                           | 27 (0)                                                | 27 (0)                                        | 54 (0)                    |
| Liver Disease                                                         | 5 (0)                                                 | 5 (0)                                         | 10 (0)                    |
| HIV/AIDS                                                              | 0                                                     | 0                                             | 0                         |
| Coagulopathy                                                          | 4 (0)                                                 | 4 (0)                                         | 8 (0)                     |
| Fluid and electrolyte disorders                                       | 210 (3)                                               | 210 (3)                                       | 420 (3)                   |
| Sepsis                                                                | 0                                                     | 0                                             | 0                         |
| Gastrointestinal bleed                                                | 1 (0)                                                 | 1 (0)                                         | 2 (0)                     |
| Any complication                                                      | 253 (4)                                               | 253 (4)                                       | 506 (4)                   |
| Days from fracture to kyphoplasty (Median, IQR)                       | --                                                    | 12 (3, 28)                                    | 12 (3, 28)                |
| Days of follow-up after kyphoplasty/ pseudo-kyphoplasty (Median, IQR) | 363 (152, 660)                                        | 494 (240, 774)                                | 430 (189, 720)            |
| Death prior to matched pair receiving kyphoplasty                     | 0                                                     | --                                            | 0                         |

<sup>1</sup>Frail score derived from Gilbert T et. al.<sup>23</sup>

<sup>2</sup>Patients whose states (including state Medicaid programs) paid his/her monthly premiums..

Abbreviations

HIV/AIDS: Human immunodeficiency virus/acquired immunodeficiency syndrome

IQR: Interquartile range

NSAID: Non-steroidal anti-inflammatory drug
